# Supplementary material for: Genome-wide determinants of sequence-specific DNA binding of general regulatory factors
Source: HighWire-hosted journal article supplement (doi:10.1101/gr.229518.117), 2018-03-21
Supplement: Supplemental_Materials.zip [file C1. Comprehensive list of Reb1 binding sites.xlsx]

## Sheet: Table S1
Table S1. Comprehensive list of Reb1 binding sites
Chromosome	Start	End	ID	Bound	Strand	Bound	ChIP-exo tags	PB-exo tags	WhIP-exo tags	ORGANIC score	Native PB-seq tags	Motif p-value	Reb1 motif sequence	Mismatches
chr12	605112	605120	chr12_605112_605120_+	1. OR;XO;PBXO	+	1. OR;XO;PBXO	1489.69	8812.82	9248.8	16.5005	1759.7	2.67e-05	ATTACCCG	0
chr14	317896	317904	chr14_317896_317904_+	1. OR;XO;PBXO	+	1. OR;XO;PBXO	5070.88	8180.79	19566.2	251.016	1871.47	4.14e-05	GTTACCCT	0
chr8	360755	360763	chr8_360755_360763_-	1. OR;XO;PBXO	-	1. OR;XO;PBXO	1095.46	7343.36	2678.37	138.664	715.962	5.35e-05	CTTACCCG	0
chr9	139477	139485	chr9_139477_139485_+	1. OR;XO;PBXO	+	1. OR;XO;PBXO	2089.75	6512.04	8677.37	70.4022	1798.97	2.67e-05	ATTACCCG	0
chr4	190750	190758	chr4_190750_190758_+	1. OR;XO;PBXO	+	1. OR;XO;PBXO	1756.58	6497.65	7877.91	127.604	1084.52	2.67e-05	ATTACCCG	0
chr13	253546	253554	chr13_253546_253554_-	1. OR;XO;PBXO	-	1. OR;XO;PBXO	2567.71	6419.95	3326.03	17.8384	1872.98	1.21e-05	GTTACCCG	0
chr1	72794	72802	chr1_72794_72802_-	1. OR;XO;PBXO	-	1. OR;XO;PBXO	237.234	5967.78	865.578	3.24064	433.505	4.14e-05	GTTACCCT	0
chr9	169894	169902	chr9_169894_169902_+	1. OR;XO;PBXO	+	1. OR;XO;PBXO	5343	5923.9	14490.8	245.07	972.742	0.000783	GTAACCCA	2
chr14	304748	304756	chr14_304748_304756_+	1. OR;XO;PBXO	+	1. OR;XO;PBXO	1542.02	5886.13	2581.22	208.679	1391.14	0.000132	GTTACCCC	1
chr4	1114153	1114161	chr4_1114153_1114161_+	1. OR;XO;PBXO	+	1. OR;XO;PBXO	4615.6	5885.77	12466.2	203.298	661.585	7.13e-05	ATTACCCT	0
chr4	56817	56825	chr4_56817_56825_-	1. OR;XO;PBXO	-	1. OR;XO;PBXO	2660.16	5861.31	6032.06	77.2402	2477.17	2.67e-05	ATTACCCG	0
chr4	56838	56846	chr4_56838_56846_-	1. OR;XO;PBXO	-	1. OR;XO;PBXO	2185.69	5791.16	4409.52	77.2402	2418.26	0.000282	ATTACCCA	1
chr9	169891	169899	chr9_169891_169899_-	1. OR;XO;PBXO	-	1. OR;XO;PBXO	5147.63	5740.8	14327.6	245.07	959.148	4.14e-05	GTTACCCT	0
chr2	568649	568657	chr2_568649_568657_+	1. OR;XO;PBXO	+	1. OR;XO;PBXO	1308.28	5735.76	14337	334.47	536.216	1.21e-05	GTTACCCG	0
chr15	912636	912644	chr15_912636_912644_+	1. OR;XO;PBXO	+	1. OR;XO;PBXO	7654.29	5700.15	18341.1	131.826	4745.89	4.14e-05	GTTACCCT	0
chr4	130638	130646	chr4_130638_130646_-	1. OR;XO;PBXO	-	1. OR;XO;PBXO	2021.72	5699.07	6236.48	34.0713	493.923	0.00043	CCTACCCG	1
chr14	187685	187693	chr14_187685_187693_+	1. OR;XO;PBXO	+	1. OR;XO;PBXO	1022.2	5630.72	5944.35	10.4949	1160.04	1.21e-05	GTTACCCG	0
chr7	976945	976953	chr7_976945_976953_-	1. OR;XO;PBXO	-	1. OR;XO;PBXO	4599.9	5628.21	15050.1	52.5638	1696.26	1.21e-05	GTTACCCG	0
chr11	213139	213147	chr11_213139_213147_+	1. OR;XO;PBXO	+	1. OR;XO;PBXO	2602.6	5586.48	3022.44	134.442	2172.05	8.6e-05	CTTACCCT	0
chr12	605126	605134	chr12_605126_605134_+	1. OR;XO;PBXO	+	1. OR;XO;PBXO	1378.05	5585.4	8116.06	16.5005	1734.02	0.000756	ATGACCCT	1
chr12	399483	399491	chr12_399483_399491_+	1. OR;XO;PBXO	+	1. OR;XO;PBXO	498.89	5562.38	3114.87	57.3801	589.083	4.14e-05	GTTACCCT	0
chr16	329247	329255	chr16_329247_329255_+	1. OR;XO;PBXO	+	1. OR;XO;PBXO	4737.71	5468.85	5563.18	127.961	2017.99	4.14e-05	GTTACCCT	0
chr3	51264	51272	chr3_51264_51272_+	1. OR;XO;PBXO	+	1. OR;XO;PBXO	819.854	5417.05	3858.33	25.1819	1373.02	0.00012	ATCACCCG	1
chr14	456295	456303	chr14_456295_456303_+	1. OR;XO;PBXO	+	1. OR;XO;PBXO	3821.91	5416.33	4496.55	130.309	1631.31	5.35e-05	CTTACCCG	0
chr5	462406	462414	chr5_462406_462414_+	1. OR;XO;PBXO	+	1. OR;XO;PBXO	2988.1	5397.63	6193.3	44.8933	3631.17	2.67e-05	ATTACCCG	0
chr15	161363	161371	chr15_161363_161371_+	1. OR;XO;PBXO	+	1. OR;XO;PBXO	291.31	5319.57	2932.04	43.8824	539.237	0.000132	GTTACCCC	1
chr6	250020	250028	chr6_250020_250028_-	1. OR;XO;PBXO	-	1. OR;XO;PBXO	2170	5311.29	13944.4	283.838	2336.7	1.21e-05	GTTACCCG	0
chr6	250023	250031	chr6_250023_250031_+	1. OR;XO;PBXO	+	1. OR;XO;PBXO	2168.25	5293.67	14356.6	283.838	2335.18	0.000198	GTAACCCT	1
chr4	130643	130651	chr4_130643_130651_-	1. OR;XO;PBXO	-	1. OR;XO;PBXO	2086.27	5293.67	6213.54	34.0713	518.091	7.13e-05	ATTACCCT	0
chr14	135760	135768	chr14_135760_135768_-	1. OR;XO;PBXO	-	1. OR;XO;PBXO	807.643	5051.57	3601.96	60.2937	735.598	5.35e-05	CTTACCCG	0
chr16	125869	125877	chr16_125869_125877_-	1. OR;XO;PBXO	-	1. OR;XO;PBXO	889.628	5041.86	4279.31	251.7	1333.74	5.35e-05	CTTACCCG	0
chr6	106467	106475	chr6_106467_106475_+	1. OR;XO;PBXO	+	1. OR;XO;PBXO	1728.67	5023.15	9910.63	16.1735	3599.45	1.21e-05	GTTACCCG	0
chr6	123223	123231	chr6_123223_123231_+	1. OR;XO;PBXO	+	1. OR;XO;PBXO	1085	5023.15	2474.62	294.125	729.556	0.000783	GTAACCCA	2
chr6	123220	123228	chr6_123220_123228_-	1. OR;XO;PBXO	-	1. OR;XO;PBXO	1058.83	5015.6	2474.62	294.125	740.13	4.14e-05	GTTACCCT	0
chr12	830829	830837	chr12_830829_830837_+	1. OR;XO;PBXO	+	1. OR;XO;PBXO	1241.99	4957.33	3464.34	47.6285	478.819	1.21e-05	GTTACCCG	0
chr13	626095	626103	chr13_626095_626103_-	1. OR;XO;PBXO	-	1. OR;XO;PBXO	3050.9	4805.16	4917.54	93.9488	1685.68	1.21e-05	GTTACCCG	0
chr8	506172	506180	chr8_506172_506180_-	1. OR;XO;PBXO	-	1. OR;XO;PBXO	464.002	4763.8	6800.49	23.5169	847.373	1.21e-05	GTTACCCG	0
chr15	461682	461690	chr15_461682_461690_+	1. OR;XO;PBXO	+	1. OR;XO;PBXO	451.792	4713.07	2453.71	46.6176	601.167	0.000108	GTAACCCG	1
chr4	1126173	1126181	chr4_1126173_1126181_-	1. OR;XO;PBXO	-	1. OR;XO;PBXO	1297.81	4705.88	2436.84	190.841	351.939	7.13e-05	ATTACCCT	0
chr2	595735	595743	chr2_595735_595743_+	1. OR;XO;PBXO	+	1. OR;XO;PBXO	889.628	4698.33	12595.7	32.228	644.97	4.14e-05	GTTACCCT	0
chr13	483240	483248	chr13_483240_483248_+	1. OR;XO;PBXO	+	1. OR;XO;PBXO	1526.32	4694.01	5524.05	36.6282	664.606	2.67e-05	ATTACCCG	0
chr4	769357	769365	chr4_769357_769365_-	1. OR;XO;PBXO	-	1. OR;XO;PBXO	5018.55	4680.7	15544.6	101.322	2410.71	1.21e-05	GTTACCCG	0
chr13	68171	68179	chr13_68171_68179_+	1. OR;XO;PBXO	+	1. OR;XO;PBXO	382.017	4640.77	994.436	86.7243	483.35	0.000405	GTTGCCCG	1
chr13	99558	99566	chr13_99558_99566_+	1. OR;XO;PBXO	+	1. OR;XO;PBXO	664.605	4590.77	3734.2	167.205	438.036	0.000159	ATAACCCG	1
chr9	197779	197787	chr9_197779_197787_-	1. OR;XO;PBXO	-	1. OR;XO;PBXO	1622.26	4573.5	4941.15	59.6694	1326.19	7.13e-05	ATTACCCT	0
chr8	187800	187808	chr8_187800_187808_-	1. OR;XO;PBXO	-	1. OR;XO;PBXO	3574.21	4568.47	12506.7	217.004	2453	4.14e-05	GTTACCCT	0
chr13	216292	216300	chr13_216292_216300_-	1. OR;XO;PBXO	-	1. OR;XO;PBXO	207.58	4497.6	493.17	128.942	453.141	0.000183	GCTACCCG	1
chr12	234883	234891	chr12_234883_234891_+	1. OR;XO;PBXO	+	1. OR;XO;PBXO	990.802	4451.2	2010.46	30.4442	933.47	4.14e-05	GTTACCCT	0
chr15	877955	877963	chr15_877955_877963_-	1. OR;XO;PBXO	-	1. OR;XO;PBXO	3375.35	4430.33	8979.61	29.9685	1752.14	4.14e-05	GTTACCCT	0
chr1	117	125	chr1_117_125_+	1. OR;XO;PBXO	+	1. OR;XO;PBXO	4858.07	4402.27	4930.35	47.6582	0	8.6e-05	CTTACCCT	0
chr15	832623	832631	chr15_832623_832631_+	1. OR;XO;PBXO	+	1. OR;XO;PBXO	11491.9	4392.56	5607.7	55.0611	4532.92	1.21e-05	GTTACCCG	0
chr4	504973	504981	chr4_504973_504981_-	1. OR;XO;PBXO	-	1. OR;XO;PBXO	908.816	4359.83	2360.61	72.7806	889.666	5.35e-05	CTTACCCG	0
chr11	493249	493257	chr11_493249_493257_+	1. OR;XO;PBXO	+	1. OR;XO;PBXO	137.805	4356.95	3278.13	2.05141	364.023	5.35e-05	CTTACCCG	0
chr9	139504	139512	chr9_139504_139512_+	1. OR;XO;PBXO	+	1. OR;XO;PBXO	866.952	4350.47	4939.12	70.4022	1783.86	2.67e-05	ATTACCCG	0
chr4	1251802	1251810	chr4_1251802_1251810_+	1. OR;XO;PBXO	+	1. OR;XO;PBXO	2344.43	4290.04	3732.85	47.0636	712.941	7.13e-05	ATTACCCT	0
chr14	392739	392747	chr14_392739_392747_-	1. OR;XO;PBXO	-	1. OR;XO;PBXO	2820.65	4273.85	11448.8	163.578	1943.97	1.21e-05	GTTACCCG	0
chr15	882140	882148	chr15_882140_882148_+	1. OR;XO;PBXO	+	1. OR;XO;PBXO	2480.49	4269.18	600.44	16.7384	1792.93	5.35e-05	CTTACCCG	0
chr1	145	153	chr1_145_153_+	1. OR;XO;PBXO	+	1. OR;XO;PBXO	4631.3	4245.44	3526.4	47.6582	0	4.14e-05	GTTACCCT	0
chr1	127	135	chr1_127_135_+	1. OR;XO;PBXO	+	1. OR;XO;PBXO	4913.89	4237.88	3734.87	47.6582	0	7.13e-05	ATTACCCT	0
chr11	284813	284821	chr11_284813_284821_+	1. OR;XO;PBXO	+	1. OR;XO;PBXO	3029.97	4215.58	10678.4	119.904	747.682	1.21e-05	GTTACCCG	0
chr5	80317	80325	chr5_80317_80325_+	1. OR;XO;PBXO	+	1. OR;XO;PBXO	280.843	4212.34	2943.5	42.1878	383.659	0.000159	ATAACCCG	1
chr7	511166	511174	chr7_511166_511174_-	1. OR;XO;PBXO	-	1. OR;XO;PBXO	1294.32	4206.95	4062.75	94.7218	2205.28	2.67e-05	ATTACCCG	0
chr14	503309	503317	chr14_503309_503317_+	1. OR;XO;PBXO	+	1. OR;XO;PBXO	3389.31	4184.28	9229.23	18.106	1540.68	1.21e-05	GTTACCCG	0
chr5	542749	542757	chr5_542749_542757_-	1. OR;XO;PBXO	-	1. OR;XO;PBXO	83.7297	4175.65	661.159	3.74606	451.63	2.67e-05	ATTACCCG	0
chr4	286841	286849	chr4_286841_286849_+	1. OR;XO;PBXO	+	1. OR;XO;PBXO	348.874	4168.1	2660.83	16.887	519.601	0.000597	GTTGCCCT	1
chr7	761221	761229	chr7_761221_761229_+	1. OR;XO;PBXO	+	1. OR;XO;PBXO	2639.23	4166.66	7291.63	323.588	708.41	4.14e-05	GTTACCCT	0
chr16	227979	227987	chr16_227979_227987_+	1. OR;XO;PBXO	+	1. OR;XO;PBXO	502.378	4163.06	4399.4	15.0734	611.74	7.13e-05	ATTACCCT	0
chr7	245282	245290	chr7_245282_245290_-	1. OR;XO;PBXO	-	1. OR;XO;PBXO	481.446	4106.58	2718.85	215.012	581.53	7.13e-05	ATTACCCT	0
chr16	264843	264851	chr16_264843_264851_-	1. OR;XO;PBXO	-	1. OR;XO;PBXO	507.612	4097.59	4790.03	111.222	413.868	1.21e-05	GTTACCCG	0
chr5	194741	194749	chr5_194741_194749_+	1. OR;XO;PBXO	+	1. OR;XO;PBXO	1069.3	4092.91	5922.09	55.8341	558.873	0.000386	GGTACCCG	1
chr2	668758	668766	chr2_668758_668766_+	1. OR;XO;PBXO	+	1. OR;XO;PBXO	2506.66	4088.24	1578.68	16.2627	3794.3	2.67e-05	ATTACCCG	0
chr7	49398	49406	chr7_49398_49406_+	1. OR;XO;PBXO	+	1. OR;XO;PBXO	5109.26	4061.98	7308.5	263.443	1099.62	7.13e-05	ATTACCCT	0
chr4	769377	769385	chr4_769377_769385_-	1. OR;XO;PBXO	-	1. OR;XO;PBXO	4737.71	4048.67	12709.1	101.322	2391.07	5.35e-05	CTTACCCG	0
chr14	618356	618364	chr14_618356_618364_-	1. OR;XO;PBXO	-	1. OR;XO;PBXO	2818.9	4006.94	4606.52	65.7642	589.083	7.13e-05	ATTACCCT	0
chr15	170591	170599	chr15_170591_170599_-	1. OR;XO;PBXO	-	1. OR;XO;PBXO	270.377	3974.93	1370.22	60.7992	635.907	0.000546	GTGACCCT	1
chr5	194729	194737	chr5_194729_194737_-	1. OR;XO;PBXO	-	1. OR;XO;PBXO	1044.88	3931.04	6040.16	55.8341	573.978	1.21e-05	GTTACCCG	0
chr14	292869	292877	chr14_292869_292877_+	1. OR;XO;PBXO	+	1. OR;XO;PBXO	682.048	3925.64	2931.36	288.982	974.252	1.21e-05	GTTACCCG	0
chr9	360568	360576	chr9_360568_360576_+	1. OR;XO;PBXO	+	1. OR;XO;PBXO	6230.89	3921.33	9653.59	205.825	3486.16	1.21e-05	GTTACCCG	0
chr15	979601	979609	chr15_979601_979609_+	1. OR;XO;PBXO	+	1. OR;XO;PBXO	4798.76	3917.01	4611.24	126.593	1611.67	2.67e-05	ATTACCCG	0
chr14	59921	59929	chr14_59921_59929_-	1. OR;XO;PBXO	-	1. OR;XO;PBXO	322.708	3915.21	750.213	92.4028	478.819	0.000386	GGTACCCG	1
chr14	59923	59931	chr14_59923_59931_+	1. OR;XO;PBXO	+	1. OR;XO;PBXO	336.663	3886.43	750.213	92.4028	477.308	0.000573	GGTACCCT	1
chr16	230992	231000	chr16_230992_231000_-	1. OR;XO;PBXO	-	1. OR;XO;PBXO	368.062	3871.33	572.779	299.506	407.827	2.67e-05	ATTACCCG	0
chr12	169584	169592	chr12_169584_169592_+	1. OR;XO;PBXO	+	1. OR;XO;PBXO	122.106	3869.17	4345.43	3.18118	382.149	1.21e-05	GTTACCCG	0
chr7	905661	905669	chr7_905661_905669_+	1. OR;XO;PBXO	+	1. OR;XO;PBXO	450.047	3869.17	1542.93	2.02168	392.722	0.00043	CCTACCCG	1
chr7	905654	905662	chr7_905654_905662_-	1. OR;XO;PBXO	-	1. OR;XO;PBXO	439.581	3863.77	1542.93	2.02168	389.701	0.000108	GTAACCCG	1
chr13	628044	628052	chr13_628044_628052_+	1. OR;XO;PBXO	+	1. OR;XO;PBXO	394.227	3850.46	1312.2	62.5533	480.329	0.000386	GGTACCCG	1
chr7	1070096	1070104	chr7_1070096_1070104_-	1. OR;XO;PBXO	-	1. OR;XO;PBXO	350.618	3841.47	2628.44	52.5043	483.35	9.59e-05	GTCACCCG	1
chr15	170594	170602	chr15_170594_170602_+	1. OR;XO;PBXO	+	1. OR;XO;PBXO	273.866	3840.39	1370.22	60.7992	641.949	9.59e-05	GTCACCCG	1
chr16	261333	261341	chr16_261333_261341_-	1. OR;XO;PBXO	-	1. OR;XO;PBXO	118.617	3836.07	986.341	35.6768	441.057	0.000108	GTAACCCG	1
chr6	173481	173489	chr6_173481_173489_+	1. OR;XO;PBXO	+	1. OR;XO;PBXO	111.64	3827.8	484.4	8.35431	533.195	8.6e-05	CTTACCCT	0
chr13	43682	43690	chr13_43682_43690_-	1. OR;XO;PBXO	-	1. OR;XO;PBXO	1104.19	3809.81	6347.8	53.9314	676.69	1.21e-05	GTTACCCG	0
chr5	194732	194740	chr5_194732_194740_+	1. OR;XO;PBXO	+	1. OR;XO;PBXO	1051.85	3800.82	6040.16	55.8341	580.02	0.000108	GTAACCCG	1
chr7	640525	640533	chr7_640525_640533_+	1. OR;XO;PBXO	+	1. OR;XO;PBXO	2742.15	3780.68	11898.8	53.0395	941.022	1.21e-05	GTTACCCG	0
chr11	571040	571048	chr11_571040_571048_-	1. OR;XO;PBXO	-	1. OR;XO;PBXO	4666.19	3777.44	6115.04	144.877	2274.77	1.21e-05	GTTACCCG	0
chr12	747721	747729	chr12_747721_747729_-	1. OR;XO;PBXO	-	1. OR;XO;PBXO	1163.49	3768.45	12747.5	205.26	1277.86	1.21e-05	GTTACCCG	0
chr4	1075310	1075318	chr4_1075310_1075318_+	1. OR;XO;PBXO	+	1. OR;XO;PBXO	1681.57	3761.25	4517.47	427.497	2235.49	0.000108	GTAACCCG	1
chr12	490766	490774	chr12_490766_490774_-	1. OR;XO;PBXO	-	1. OR;XO;PBXO	1697.27	3756.21	4548.5	68.5291	1676.62	1.21e-05	GTTACCCG	0
chr7	1026212	1026220	chr7_1026212_1026220_+	1. OR;XO;PBXO	+	1. OR;XO;PBXO	678.56	3737.15	7296.36	7.34347	410.847	7.13e-05	ATTACCCT	0
chr12	669058	669066	chr12_669058_669066_+	1. OR;XO;PBXO	+	1. OR;XO;PBXO	1390.26	3736.07	5756.13	276.168	942.532	2.67e-05	ATTACCCG	0
chr7	53705	53713	chr7_53705_53713_-	1. OR;XO;PBXO	-	1. OR;XO;PBXO	2520.61	3725.64	6221.64	286.871	1161.55	5.35e-05	CTTACCCG	0
chr3	205537	205545	chr3_205537_205545_+	1. OR;XO;PBXO	+	1. OR;XO;PBXO	2771.8	3700.82	6009.8	584.683	815.653	1.21e-05	GTTACCCG	0
chr3	50465	50473	chr3_50465_50473_-	1. OR;XO;PBXO	-	1. OR;XO;PBXO	5552.33	3684.27	3682.92	8.20566	1031.65	4.14e-05	GTTACCCT	0
chr9	310929	310937	chr9_310929_310937_+	1. OR;XO;PBXO	+	1. OR;XO;PBXO	4202.19	3650.1	8220.63	298.198	2753.58	1.21e-05	GTTACCCG	0
chr12	1064963	1064971	chr12_1064963_1064971_-	1. OR;XO;PBXO	-	1. OR;XO;PBXO	3343.96	3648.3	4129.54	60.2937	699.347	7.13e-05	ATTACCCT	0
chr8	151408	151416	chr8_151408_151416_-	1. OR;XO;PBXO	-	1. OR;XO;PBXO	1247.22	3646.86	1291.28	44.1797	684.242	7.13e-05	ATTACCCT	0
chr12	377440	377448	chr12_377440_377448_+	1. OR;XO;PBXO	+	1. OR;XO;PBXO	1508.88	3634.27	4406.82	267.219	4434.74	1.21e-05	GTTACCCG	0
chr15	948788	948796	chr15_948788_948796_+	1. OR;XO;PBXO	+	1. OR;XO;PBXO	174.437	3624.2	2964.42	7.64077	502.986	0.000173	GTTACCCA	1
chr9	131917	131925	chr9_131917_131925_+	1. OR;XO;PBXO	+	1. OR;XO;PBXO	2046.15	3623.12	6143.38	20.9006	445.588	5.35e-05	CTTACCCG	0
chr4	570456	570464	chr4_570456_570464_+	1. OR;XO;PBXO	+	1. OR;XO;PBXO	1107.67	3619.52	4676.68	157.81	691.795	1.21e-05	GTTACCCG	0
chr2	589292	589300	chr2_589292_589300_+	1. OR;XO;PBXO	+	1. OR;XO;PBXO	1634.47	3615.2	1528.76	188.344	1717.4	0.000213	TTTACCCG	1
chr10	649588	649596	chr10_649588_649596_+	1. OR;XO;PBXO	+	1. OR;XO;PBXO	545.988	3606.93	1235.29	52.0584	638.928	7.13e-05	ATTACCCT	0
chr15	77421	77429	chr15_77421_77429_+	1. OR;XO;PBXO	+	1. OR;XO;PBXO	1304.79	3600.81	2594.71	234.842	1090.56	4.14e-05	GTTACCCT	0
chr9	166209	166217	chr9_166209_166217_-	1. OR;XO;PBXO	-	1. OR;XO;PBXO	1069.3	3592.9	6467.88	22.1493	1152.49	7.13e-05	ATTACCCT	0
chr16	797403	797411	chr16_797403_797411_+	1. OR;XO;PBXO	+	1. OR;XO;PBXO	702.981	3586.07	6400.42	78.1024	427.463	4.14e-05	GTTACCCT	0
chr11	63635	63643	chr11_63635_63643_-	1. OR;XO;PBXO	-	1. OR;XO;PBXO	526.8	3574.2	1729.81	342.646	422.931	0.000213	TTTACCCG	1
chr7	648185	648193	chr7_648185_648193_+	1. OR;XO;PBXO	+	1. OR;XO;PBXO	1735.65	3562.32	8905.4	304.828	957.637	7.13e-05	ATTACCCT	0
chr12	424028	424036	chr12_424028_424036_-	1. OR;XO;PBXO	-	1. OR;XO;PBXO	526.8	3540.38	905.382	7.46239	744.661	9.59e-05	GTCACCCG	1
chr9	343950	343958	chr9_343950_343958_-	1. OR;XO;PBXO	-	1. OR;XO;PBXO	85.4741	3535.71	0	50.0664	515.07	0.000686	GTAACCCC	2
chr12	168900	168908	chr12_168900_168908_+	1. OR;XO;PBXO	+	1. OR;XO;PBXO	83.7297	3532.83	3799.64	23.8737	454.651	2.67e-05	ATTACCCG	0
chr7	976923	976931	chr7_976923_976931_+	1. OR;XO;PBXO	+	1. OR;XO;PBXO	3914.36	3514.84	14734.4	52.5638	1622.24	4.14e-05	GTTACCCT	0
chr8	117612	117620	chr8_117612_117620_+	1. OR;XO;PBXO	+	1. OR;XO;PBXO	680.304	3509.09	12473	50.1853	749.192	4.14e-05	GTTACCCT	0
chr12	81195	81203	chr12_81195_81203_-	1. OR;XO;PBXO	-	1. OR;XO;PBXO	1840.31	3488.22	3620.18	48.3123	1453.07	9.59e-05	GTCACCCG	1
chr11	174011	174019	chr11_174011_174019_+	1. OR;XO;PBXO	+	1. OR;XO;PBXO	3502.69	3464.12	5987.53	196.014	4185.51	0.000213	TTTACCCG	1
chr13	851787	851795	chr13_851787_851795_-	1. OR;XO;PBXO	-	1. OR;XO;PBXO	2251.98	3431.03	4068.82	110.984	1030.14	0.000213	TTTACCCG	1
chr15	316564	316572	chr15_316564_316572_+	1. OR;XO;PBXO	+	1. OR;XO;PBXO	4751.66	3424.55	11866.4	70.7292	2425.81	1.21e-05	GTTACCCG	0
chr11	171647	171655	chr11_171647_171655_+	1. OR;XO;PBXO	+	1. OR;XO;PBXO	5475.58	3401.17	11762.6	202.347	2747.54	1.21e-05	GTTACCCG	0
chr8	151431	151439	chr8_151431_151439_+	1. OR;XO;PBXO	+	1. OR;XO;PBXO	1203.61	3391.46	1814.14	44.1797	703.878	8.6e-05	CTTACCCT	0
chr10	265237	265245	chr10_265237_265245_-	1. OR;XO;PBXO	-	1. OR;XO;PBXO	415.16	3387.5	97.1498	86.5162	373.086	8.6e-05	CTTACCCT	0
chr11	392397	392405	chr11_392397_392405_+	1. OR;XO;PBXO	+	1. OR;XO;PBXO	1323.98	3383.9	5401.94	590.54	601.167	4.14e-05	GTTACCCT	0
chr15	877941	877949	chr15_877941_877949_-	1. OR;XO;PBXO	-	1. OR;XO;PBXO	3722.48	3382.46	10065.8	29.9685	1734.02	4.14e-05	GTTACCCT	0
chr2	227403	227411	chr2_227403_227411_+	1. OR;XO;PBXO	+	1. OR;XO;PBXO	162.226	3375.99	718.504	86.1891	510.538	9.59e-05	GTCACCCG	1
chr1	87164	87172	chr1_87164_87172_-	1. OR;XO;PBXO	-	1. OR;XO;PBXO	2025.21	3372.39	5406.66	540.83	1986.27	4.14e-05	GTTACCCT	0
chr16	840591	840599	chr16_840591_840599_+	1. OR;XO;PBXO	+	1. OR;XO;PBXO	2511.89	3363.04	8317.1	26.4603	2113.15	1.21e-05	GTTACCCG	0
chr6	95331	95339	chr6_95331_95339_-	1. OR;XO;PBXO	-	1. OR;XO;PBXO	2321.76	3359.8	2045.54	28.5711	1002.95	0.000364	GTGACCCG	1
chr9	343953	343961	chr9_343953_343961_+	1. OR;XO;PBXO	+	1. OR;XO;PBXO	83.7297	3349.01	0	50.0664	515.07	0.000173	GTTACCCA	1
chr4	1075292	1075300	chr4_1075292_1075300_+	1. OR;XO;PBXO	+	1. OR;XO;PBXO	1435.62	3329.94	3850.24	427.497	2235.49	0.000354	CTTACCCC	1
chr4	1378651	1378659	chr4_1378651_1378659_-	1. OR;XO;PBXO	-	1. OR;XO;PBXO	111.64	3319.15	1966.61	13.2896	457.672	0.000132	GTTACCCC	1
chr14	387060	387068	chr14_387060_387068_-	1. OR;XO;PBXO	-	1. OR;XO;PBXO	507.612	3313.04	7851.59	251.759	478.819	1.21e-05	GTTACCCG	0
chr8	389843	389851	chr8_389843_389851_-	1. OR;XO;PBXO	-	1. OR;XO;PBXO	81.9854	3305.84	2502.28	12.1598	513.559	2.67e-05	ATTACCCG	0
chr7	866246	866254	chr7_866246_866254_+	1. OR;XO;PBXO	+	1. OR;XO;PBXO	2920.07	3284.98	3261.27	407.458	1830.69	5.35e-05	CTTACCCG	0
chr2	132301	132309	chr2_132301_132309_-	1. OR;XO;PBXO	-	1. OR;XO;PBXO	729.146	3273.11	7355.73	140.239	359.492	2.67e-05	ATTACCCG	0
chr13	684088	684096	chr13_684088_684096_+	1. OR;XO;PBXO	+	1. OR;XO;PBXO	1576.91	3265.19	5617.15	234.842	663.096	4.14e-05	GTTACCCT	0
chr16	870537	870545	chr16_870537_870545_+	1. OR;XO;PBXO	+	1. OR;XO;PBXO	2459.56	3257.64	7044.04	108.903	1801.99	2.67e-05	ATTACCCG	0
chr5	284782	284790	chr5_284782_284790_+	1. OR;XO;PBXO	+	1. OR;XO;PBXO	552.965	3255.12	4232.76	20.9304	1119.26	1.21e-05	GTTACCCG	0
chr2	582290	582298	chr2_582290_582298_+	1. OR;XO;PBXO	+	1. OR;XO;PBXO	1137.33	3241.81	12010.1	174.995	531.685	1.21e-05	GTTACCCG	0
chr7	35226	35234	chr7_35226_35234_+	1. OR;XO;PBXO	+	1. OR;XO;PBXO	2642.72	3240.37	10451	111.252	610.229	1.21e-05	GTTACCCG	0
chr13	695213	695221	chr13_695213_695221_+	1. OR;XO;PBXO	+	1. OR;XO;PBXO	5922.13	3223.47	6922.6	282.055	1499.9	2.67e-05	ATTACCCG	0
chr9	360551	360559	chr9_360551_360559_+	1. OR;XO;PBXO	+	1. OR;XO;PBXO	5177.29	3215.19	3684.95	205.825	3490.69	0.000686	GTAACCCC	2
chr16	75461	75469	chr16_75461_75469_+	1. OR;XO;PBXO	+	1. OR;XO;PBXO	11245.9	3196.13	10495.6	26.4305	3221.83	5.35e-05	CTTACCCG	0
chr9	160568	160576	chr9_160568_160576_+	1. OR;XO;PBXO	+	1. OR;XO;PBXO	5426.73	3186.78	4795.42	379.749	2028.56	1.21e-05	GTTACCCG	0
chr12	440088	440096	chr12_440088_440096_-	1. OR;XO;PBXO	-	1. OR;XO;PBXO	1224.55	3177.42	9704.86	8.71108	1012.01	1.21e-05	GTTACCCG	0
chr13	266965	266973	chr13_266965_266973_-	1. OR;XO;PBXO	-	1. OR;XO;PBXO	3560.26	3172.03	5480.19	131.945	740.13	1.21e-05	GTTACCCG	0
chr10	576774	576782	chr10_576774_576782_-	1. OR;XO;PBXO	-	1. OR;XO;PBXO	2367.11	3169.51	8018.91	91.1541	625.334	1.21e-05	GTTACCCG	0
chr5	221686	221694	chr5_221686_221694_+	1. OR;XO;PBXO	+	1. OR;XO;PBXO	397.716	3155.12	2073.88	12.1598	1732.51	0.000457	GATACCCG	1
chr8	390128	390136	chr8_390128_390136_+	1. OR;XO;PBXO	+	1. OR;XO;PBXO	341.896	3150.08	2747.86	70.6995	613.25	1.21e-05	GTTACCCG	0
chr2	532374	532382	chr2_532374_532382_-	1. OR;XO;PBXO	-	1. OR;XO;PBXO	1379.8	3147.57	2944.85	161.645	1309.58	2.67e-05	ATTACCCG	0
chr12	543783	543791	chr12_543783_543791_-	1. OR;XO;PBXO	-	1. OR;XO;PBXO	675.071	3147.57	2143.37	221.434	2889.53	2.67e-05	ATTACCCG	0
chr15	689502	689510	chr15_689502_689510_-	1. OR;XO;PBXO	-	1. OR;XO;PBXO	160.482	3142.53	1289.93	82.5917	427.463	2.67e-05	ATTACCCG	0
chr4	1120364	1120372	chr4_1120364_1120372_+	1. OR;XO;PBXO	+	1. OR;XO;PBXO	2763.08	3135.69	2411.88	517.581	581.53	2.67e-05	ATTACCCG	0
chr13	306853	306861	chr13_306853_306861_-	1. OR;XO;PBXO	-	1. OR;XO;PBXO	1606.56	3116.99	1164.45	39.8688	664.606	5.35e-05	CTTACCCG	0
chr10	68935	68943	chr10_68935_68943_-	1. OR;XO;PBXO	-	1. OR;XO;PBXO	2417.7	3109.43	2079.28	37.2525	478.819	5.35e-05	CTTACCCG	0
chr16	499460	499468	chr16_499460_499468_-	1. OR;XO;PBXO	-	1. OR;XO;PBXO	450.047	3097.56	2251.31	30.0577	649.502	0.00012	ATCACCCG	1
chr9	143084	143092	chr9_143084_143092_+	1. OR;XO;PBXO	+	1. OR;XO;PBXO	4249.28	3095.77	780.572	131.528	1821.63	1.21e-05	GTTACCCG	0
chr16	821363	821371	chr16_821363_821371_+	1. OR;XO;PBXO	+	1. OR;XO;PBXO	163.971	3081.74	2633.84	2.5271	977.273	9.59e-05	GTCACCCG	1
chr15	1000945	1000953	chr15_1000945_1000953_+	1. OR;XO;PBXO	+	1. OR;XO;PBXO	1465.27	3073.1	5195.49	195.895	643.46	1.21e-05	GTTACCCG	0
chr2	84432	84440	chr2_84432_84440_+	1. OR;XO;PBXO	+	1. OR;XO;PBXO	709.958	3049.36	4205.1	53.5152	522.622	2.67e-05	ATTACCCG	0
chr4	907168	907176	chr4_907168_907176_-	1. OR;XO;PBXO	-	1. OR;XO;PBXO	1240.25	3033.17	3841.47	317.91	1522.55	0.000573	AATACCCG	1
chr15	502608	502616	chr15_502608_502616_+	1. OR;XO;PBXO	+	1. OR;XO;PBXO	798.921	3027.42	13758.8	409.421	823.205	2.67e-05	ATTACCCG	0
chr12	501187	501195	chr12_501187_501195_+	1. OR;XO;PBXO	+	1. OR;XO;PBXO	1885.66	3027.42	7684.28	191.495	712.941	1.21e-05	GTTACCCG	0
chr15	109379	109387	chr15_109379_109387_+	1. OR;XO;PBXO	+	1. OR;XO;PBXO	193.625	3017.71	244.899	3.15145	587.572	0.000364	GTGACCCG	1
chr7	596370	596378	chr7_596370_596378_+	1. OR;XO;PBXO	+	1. OR;XO;PBXO	2504.91	3004.04	1869.46	26.4305	6562.99	2.67e-05	ATTACCCG	0
chr7	191001	191009	chr7_191001_191009_-	1. OR;XO;PBXO	-	1. OR;XO;PBXO	1100.7	3000.44	1277.79	40.1958	1690.21	8.6e-05	CTTACCCT	0
chr12	377459	377467	chr12_377459_377467_+	1. OR;XO;PBXO	+	1. OR;XO;PBXO	1618.77	2999.72	4636.88	267.219	4442.29	2.67e-05	ATTACCCG	0
chr2	369833	369841	chr2_369833_369841_-	1. OR;XO;PBXO	-	1. OR;XO;PBXO	809.387	2990.01	3029.19	83.2161	647.991	7.13e-05	ATTACCCT	0
chr2	490658	490666	chr2_490658_490666_-	1. OR;XO;PBXO	-	1. OR;XO;PBXO	188.392	2986.77	794.065	5.58936	403.295	0.000619	GTCACCCC	2
chr3	31284	31292	chr3_31284_31292_-	1. OR;XO;PBXO	-	1. OR;XO;PBXO	1850.78	2968.78	9726.45	639.833	1468.18	0.000108	GTAACCCG	1
chr4	1241625	1241633	chr4_1241625_1241633_+	1. OR;XO;PBXO	+	1. OR;XO;PBXO	73.2635	2963.75	787.993	5.41098	453.141	0.000159	ATAACCCG	1
chr3	31287	31295	chr3_31287_31295_+	1. OR;XO;PBXO	+	1. OR;XO;PBXO	1742.63	2954.75	9101.72	639.833	1463.64	0.000173	GTTACCCA	1
chr9	151464	151472	chr9_151464_151472_-	1. OR;XO;PBXO	-	1. OR;XO;PBXO	1381.54	2947.2	4418.97	426.01	2386.54	1.21e-05	GTTACCCG	0
chr15	109385	109393	chr15_109385_109393_-	1. OR;XO;PBXO	-	1. OR;XO;PBXO	191.881	2940.73	180.132	3.15145	592.104	0.000947	ACCACCCG	2
chr14	736589	736597	chr14_736589_736597_+	1. OR;XO;PBXO	+	1. OR;XO;PBXO	95.9403	2940.73	2678.37	42.4554	410.847	4.14e-05	GTTACCCT	0
chr2	60037	60045	chr2_60037_60045_+	1. OR;XO;PBXO	+	1. OR;XO;PBXO	221.535	2933.53	4636.21	9.72192	438.036	8.6e-05	CTTACCCT	0
chr5	150160	150168	chr5_150160_150168_-	1. OR;XO;PBXO	-	1. OR;XO;PBXO	136.061	2930.29	1190.76	27.3819	666.117	7.13e-05	ATTACCCT	0
chr5	150178	150186	chr5_150178_150186_+	1. OR;XO;PBXO	+	1. OR;XO;PBXO	150.016	2929.57	1238.66	27.3819	700.857	0.000159	ATAACCCG	1
chr2	565523	565531	chr2_565523_565531_+	1. OR;XO;PBXO	+	1. OR;XO;PBXO	1078.02	2922.74	1721.04	133.461	430.484	2.67e-05	ATTACCCG	0
chr13	502019	502027	chr13_502019_502027_-	1. OR;XO;PBXO	-	1. OR;XO;PBXO	3659.69	2918.06	9817.53	290.141	1729.49	1.21e-05	GTTACCCG	0
chr15	943506	943514	chr15_943506_943514_+	1. OR;XO;PBXO	+	1. OR;XO;PBXO	251.189	2911.23	673.977	37.6985	421.421	9.59e-05	GTCACCCG	1
chr7	731836	731844	chr7_731836_731844_+	1. OR;XO;PBXO	+	1. OR;XO;PBXO	78.4966	2907.63	4792.72	11.3571	302.094	0.000173	GTTACCCA	1
chr16	49092	49100	chr16_49092_49100_+	1. OR;XO;PBXO	+	1. OR;XO;PBXO	3286.39	2901.16	3911.63	161.973	3218.81	2.67e-05	ATTACCCG	0
chr11	619523	619531	chr11_619523_619531_-	1. OR;XO;PBXO	-	1. OR;XO;PBXO	383.761	2896.84	3442.75	200.503	1078.47	0.000132	GTTACCCC	1
chr2	662716	662724	chr2_662716_662724_-	1. OR;XO;PBXO	-	1. OR;XO;PBXO	3968.44	2884.97	2891.56	19.0573	1347.34	5.35e-05	CTTACCCG	0
chr13	653455	653463	chr13_653455_653463_+	1. OR;XO;PBXO	+	1. OR;XO;PBXO	226.768	2880.29	1250.8	5.79747	583.041	0.000132	GTTACCCC	1
chr11	640435	640443	chr11_640435_640443_+	1. OR;XO;PBXO	+	1. OR;XO;PBXO	123.85	2878.49	442.571	29.7901	475.798	0.000364	GTGACCCG	1
chr16	261313	261321	chr16_261313_261321_+	1. OR;XO;PBXO	+	1. OR;XO;PBXO	109.895	2875.62	1244.06	35.6768	451.63	0.00051	AGTACCCG	1
chr4	811799	811807	chr4_811799_811807_+	1. OR;XO;PBXO	+	1. OR;XO;PBXO	1986.84	2865.9	8748.88	69.0345	1128.32	0.000173	GTTACCCA	1
chr4	907195	907203	chr4_907195_907203_+	1. OR;XO;PBXO	+	1. OR;XO;PBXO	1817.63	2863.74	3002.87	317.91	1533.13	5.35e-05	CTTACCCG	0
chr2	122223	122231	chr2_122223_122231_+	1. OR;XO;PBXO	+	1. OR;XO;PBXO	976.847	2853.31	3758.48	142.083	598.146	1.21e-05	GTTACCCG	0
chr14	479380	479388	chr14_479380_479388_-	1. OR;XO;PBXO	-	1. OR;XO;PBXO	5119.72	2843.96	4119.42	26.3116	5366.7	5.35e-05	CTTACCCG	0
chr11	145	153	chr11_145_153_+	1. OR;XO;PBXO	+	1. OR;XO;PBXO	6133.2	2828.85	4745.5	35.9741	0	4.14e-05	GTTACCCT	0
chr11	178271	178279	chr11_178271_178279_-	1. OR;XO;PBXO	-	1. OR;XO;PBXO	2346.18	2825.97	4132.92	58.5396	770.339	2.67e-05	ATTACCCG	0
chr7	434011	434019	chr7_434011_434019_+	1. OR;XO;PBXO	+	1. OR;XO;PBXO	80.241	2817.7	1998.99	35.2605	421.421	2.67e-05	ATTACCCG	0
chr4	301103	301111	chr4_301103_301111_-	1. OR;XO;PBXO	-	1. OR;XO;PBXO	896.606	2816.98	7778.73	33.1794	539.237	2.67e-05	ATTACCCG	0
chr15	631913	631921	chr15_631913_631921_-	1. OR;XO;PBXO	-	1. OR;XO;PBXO	2224.07	2813.74	1520.66	29.7009	931.959	0.000159	ATAACCCG	1
chr2	427618	427626	chr2_427618_427626_+	1. OR;XO;PBXO	+	1. OR;XO;PBXO	727.402	2811.95	3386.75	309.853	524.133	4.14e-05	GTTACCCT	0
chr7	770419	770427	chr7_770419_770427_-	1. OR;XO;PBXO	-	1. OR;XO;PBXO	1149.54	2804.75	10297.9	204.874	587.572	1.21e-05	GTTACCCG	0
chr3	179306	179314	chr3_179306_179314_-	1. OR;XO;PBXO	-	1. OR;XO;PBXO	7561.84	2802.23	10117.7	360.395	4185.51	2.67e-05	ATTACCCG	0
chr10	383679	383687	chr10_383679_383687_+	1. OR;XO;PBXO	+	1. OR;XO;PBXO	720.425	2793.96	3793.57	50.4826	617.782	8.6e-05	CTTACCCT	0
chr14	651971	651979	chr14_651971_651979_+	1. OR;XO;PBXO	+	1. OR;XO;PBXO	2091.5	2787.12	3048.08	16.4113	4368.28	4.14e-05	GTTACCCT	0
chr10	295064	295072	chr10_295064_295072_+	1. OR;XO;PBXO	+	1. OR;XO;PBXO	1665.87	2778.13	3039.31	50.7502	625.334	1.21e-05	GTTACCCG	0
chr16	840608	840616	chr16_840608_840616_+	1. OR;XO;PBXO	+	1. OR;XO;PBXO	2006.02	2765.18	9037.63	26.4603	2113.15	0.000223	CTCACCCG	1
chr5	128455	128463	chr5_128455_128463_-	1. OR;XO;PBXO	-	1. OR;XO;PBXO	2154.3	2752.95	3361.79	109.914	3492.2	2.67e-05	ATTACCCG	0
chr13	854647	854655	chr13_854647_854655_+	1. OR;XO;PBXO	+	1. OR;XO;PBXO	938.471	2749.35	11081.8	71.859	826.226	2.67e-05	ATTACCCG	0
chr13	851762	851770	chr13_851762_851770_-	1. OR;XO;PBXO	-	1. OR;XO;PBXO	2325.24	2725.61	5329.07	110.984	1025.61	1.21e-05	GTTACCCG	0
chr11	441039	441047	chr11_441039_441047_+	1. OR;XO;PBXO	+	1. OR;XO;PBXO	109.895	2723.09	1426.21	7.81916	419.91	0.000213	TTTACCCG	1
chr15	87288	87296	chr15_87288_87296_+	1. OR;XO;PBXO	+	1. OR;XO;PBXO	755.312	2721.65	2517.8	41.8905	1312.6	5.35e-05	CTTACCCG	0
chr11	507797	507805	chr11_507797_507805_-	1. OR;XO;PBXO	-	1. OR;XO;PBXO	699.492	2715.54	7494.03	289.576	2099.55	1.21e-05	GTTACCCG	0
chr11	245783	245791	chr11_245783_245791_+	1. OR;XO;PBXO	+	1. OR;XO;PBXO	3924.83	2709.78	12394.7	78.3402	2146.38	1.21e-05	GTTACCCG	0
chr13	192051	192059	chr13_192051_192059_-	1. OR;XO;PBXO	-	1. OR;XO;PBXO	2428.16	2704.75	641.594	99.5679	2389.56	0.000213	TTTACCCG	1
chr16	49075	49083	chr16_49075_49083_-	1. OR;XO;PBXO	-	1. OR;XO;PBXO	3035.2	2700.43	4784.63	161.973	3205.21	5.35e-05	CTTACCCG	0
chr5	533237	533245	chr5_533237_533245_+	1. OR;XO;PBXO	+	1. OR;XO;PBXO	235.49	2693.6	3653.91	7.55158	963.679	1.21e-05	GTTACCCG	0
chr15	585977	585985	chr15_585977_585985_+	1. OR;XO;PBXO	+	1. OR;XO;PBXO	66.286	2691.8	1690	4.34067	229.591	0.000198	GTAACCCT	1
chr10	137236	137244	chr10_137236_137244_+	1. OR;XO;PBXO	+	1. OR;XO;PBXO	1290.83	2683.52	3734.2	198.898	1252.18	7.13e-05	ATTACCCT	0
chr16	138509	138517	chr16_138509_138517_+	1. OR;XO;PBXO	+	1. OR;XO;PBXO	256.422	2677.41	425.03	32.6442	462.203	2.67e-05	ATTACCCG	0
chr11	230896	230904	chr11_230896_230904_-	1. OR;XO;PBXO	-	1. OR;XO;PBXO	88.9628	2665.54	422.332	8.23539	460.693	4.14e-05	GTTACCCT	0
chr12	371306	371314	chr12_371306_371314_+	1. OR;XO;PBXO	+	1. OR;XO;PBXO	14544.6	2659.78	6748.54	45.0717	1306.56	4.14e-05	GTTACCCT	0
chr15	304191	304199	chr15_304191_304199_-	1. OR;XO;PBXO	-	1. OR;XO;PBXO	245.956	2655.47	706.36	53.9908	489.392	0.000108	GTAACCCG	1
chr12	1064944	1064952	chr12_1064944_1064952_-	1. OR;XO;PBXO	-	1. OR;XO;PBXO	3352.68	2655.11	3675.5	60.2937	767.318	4.14e-05	GTTACCCT	0
chr5	349765	349773	chr5_349765_349773_+	1. OR;XO;PBXO	+	1. OR;XO;PBXO	982.08	2653.67	1596.23	59.5505	566.426	4.14e-05	GTTACCCT	0
chr14	64730	64738	chr14_64730_64738_-	1. OR;XO;PBXO	-	1. OR;XO;PBXO	2309.55	2641.08	5850.58	93.4731	2270.23	1.21e-05	GTTACCCG	0
chr4	1090256	1090264	chr4_1090256_1090264_+	1. OR;XO;PBXO	+	1. OR;XO;PBXO	7012.37	2632.8	5018.06	325.58	1353.38	2.67e-05	ATTACCCG	0
chr4	811824	811832	chr4_811824_811832_+	1. OR;XO;PBXO	+	1. OR;XO;PBXO	1845.54	2628.85	9397.9	69.0345	1126.81	2.67e-05	ATTACCCG	0
chr13	558719	558727	chr13_558719_558727_-	1. OR;XO;PBXO	-	1. OR;XO;PBXO	558.198	2627.77	4188.24	47.9853	351.939	0.000132	GTTACCCC	1
chr14	694918	694926	chr14_694918_694926_-	1. OR;XO;PBXO	-	1. OR;XO;PBXO	287.821	2620.57	2411.2	32.4956	439.546	5.35e-05	CTTACCCG	0
chr13	645518	645526	chr13_645518_645526_-	1. OR;XO;PBXO	-	1. OR;XO;PBXO	340.152	2616.98	1955.81	147.018	380.638	0.000534	ATTGCCCG	1
chr11	329592	329600	chr11_329592_329600_+	1. OR;XO;PBXO	+	1. OR;XO;PBXO	1446.08	2613.38	4821.06	628.506	1345.83	1.21e-05	GTTACCCG	0
chr14	647051	647059	chr14_647051_647059_-	1. OR;XO;PBXO	-	1. OR;XO;PBXO	3828.89	2613.02	6805.89	101.203	2312.53	1.21e-05	GTTACCCG	0
chr14	230821	230829	chr14_230821_230829_-	1. OR;XO;PBXO	-	1. OR;XO;PBXO	1310.02	2610.14	7991.25	125.523	687.263	2.67e-05	ATTACCCG	0
chr14	783840	783848	chr14_783840_783848_-	1. OR;XO;PBXO	-	1. OR;XO;PBXO	2733.43	2609.78	3669.43	1.90276	1812.56	0.000282	ATTACCCA	1
chr2	435818	435826	chr2_435818_435826_+	1. OR;XO;PBXO	+	1. OR;XO;PBXO	676.815	2606.18	1915.34	189.533	1202.33	0.000183	GCTACCCG	1
chr16	153316	153324	chr16_153316_153324_+	1. OR;XO;PBXO	+	1. OR;XO;PBXO	1573.42	2603.31	2156.19	82.7701	1700.79	1.21e-05	GTTACCCG	0
chr7	560418	560426	chr7_560418_560426_+	1. OR;XO;PBXO	+	1. OR;XO;PBXO	1310.02	2599.35	8364.33	132.777	654.033	1.21e-05	GTTACCCG	0
chr8	160608	160616	chr8_160608_160616_+	1. OR;XO;PBXO	+	1. OR;XO;PBXO	4765.62	2580.28	6140	342.824	3404.6	1.21e-05	GTTACCCG	0
chr10	223635	223643	chr10_223635_223643_+	1. OR;XO;PBXO	+	1. OR;XO;PBXO	4130.67	2573.09	6607.54	483.539	3681.01	1.21e-05	GTTACCCG	0
chr14	104169	104177	chr14_104169_104177_-	1. OR;XO;PBXO	-	1. OR;XO;PBXO	1542.02	2571.29	3203.92	226.102	2034.6	5.35e-05	CTTACCCG	0
chr4	363037	363045	chr4_363037_363045_+	1. OR;XO;PBXO	+	1. OR;XO;PBXO	78.4966	2561.58	3159.39	2.73522	270.374	8.6e-05	CTTACCCT	0
chr13	420245	420253	chr13_420245_420253_-	1. OR;XO;PBXO	-	1. OR;XO;PBXO	242.467	2556.9	2311.36	32.7037	367.044	0.000294	ACTACCCG	1
chr12	125113	125121	chr12_125113_125121_-	1. OR;XO;PBXO	-	1. OR;XO;PBXO	3153.82	2536.04	6939.47	26.044	3347.2	4.14e-05	GTTACCCT	0
chr11	339612	339620	chr11_339612_339620_+	1. OR;XO;PBXO	+	1. OR;XO;PBXO	1104.19	2531.36	4056.01	123.501	1030.14	7.13e-05	ATTACCCT	0
chr4	592217	592225	chr4_592217_592225_-	1. OR;XO;PBXO	-	1. OR;XO;PBXO	1885.66	2531.36	3398.89	129.953	962.169	1.21e-05	GTTACCCG	0
chr11	371629	371637	chr11_371629_371637_-	1. OR;XO;PBXO	-	1. OR;XO;PBXO	333.175	2526.69	719.179	69.7778	392.722	0.000354	CTTACCCC	1
chr2	392002	392010	chr2_392002_392010_-	1. OR;XO;PBXO	-	1. OR;XO;PBXO	3612.59	2525.61	2041.5	51.2854	569.447	4.14e-05	GTTACCCT	0
chr7	79087	79095	chr7_79087_79095_+	1. OR;XO;PBXO	+	1. OR;XO;PBXO	418.649	2525.61	2269.53	163.637	353.45	0.000573	GGTACCCT	1
chr7	79085	79093	chr7_79085_79093_-	1. OR;XO;PBXO	-	1. OR;XO;PBXO	415.16	2523.81	2269.53	163.637	348.918	0.000386	GGTACCCG	1
chr16	163779	163787	chr16_163779_163787_+	1. OR;XO;PBXO	+	1. OR;XO;PBXO	4312.08	2519.13	4714.47	38.4417	3360.79	2.67e-05	ATTACCCG	0
chr13	469642	469650	chr13_469642_469650_+	1. OR;XO;PBXO	+	1. OR;XO;PBXO	81.9854	2503.3	1480.19	11.922	403.295	4.14e-05	GTTACCCT	0
chr1	59232	59240	chr1_59232_59240_-	1. OR;XO;PBXO	-	1. OR;XO;PBXO	68.0304	2500.79	324.507	2.9136	421.421	0.000294	ACTACCCG	1
chr4	765545	765553	chr4_765545_765553_-	1. OR;XO;PBXO	-	1. OR;XO;PBXO	612.274	2497.91	3249.8	32.7632	561.894	1.21e-05	GTTACCCG	0
chr2	124949	124957	chr2_124949_124957_+	1. OR;XO;PBXO	+	1. OR;XO;PBXO	1615.29	2496.11	5316.93	128.377	478.819	4.14e-05	GTTACCCT	0
chr11	340745	340753	chr11_340745_340753_+	1. OR;XO;PBXO	+	1. OR;XO;PBXO	4615.6	2493.95	1816.16	16.9167	1261.24	1.21e-05	GTTACCCG	0
chr15	61251	61259	chr15_61251_61259_-	1. OR;XO;PBXO	-	1. OR;XO;PBXO	650.65	2489.99	6368.04	138.069	731.067	2.67e-05	ATTACCCG	0
chr12	948241	948249	chr12_948241_948249_-	1. OR;XO;PBXO	-	1. OR;XO;PBXO	648.905	2485.32	1173.22	66.775	431.994	5.35e-05	CTTACCCG	0
chr12	327595	327603	chr12_327595_327603_+	1. OR;XO;PBXO	+	1. OR;XO;PBXO	617.507	2479.92	1418.12	49.1745	317.198	2.67e-05	ATTACCCG	0
chr13	408457	408465	chr13_408457_408465_+	1. OR;XO;PBXO	+	1. OR;XO;PBXO	388.994	2479.56	431.102	3.92444	276.416	0.00012	ATCACCCG	1
chr11	282715	282723	chr11_282715_282723_-	1. OR;XO;PBXO	-	1. OR;XO;PBXO	3724.23	2471.65	9928.17	62.6722	1463.64	7.13e-05	ATTACCCT	0
chr4	223894	223902	chr4_223894_223902_+	1. OR;XO;PBXO	+	1. OR;XO;PBXO	1280.37	2459.06	4160.58	133.253	658.564	2.67e-05	ATTACCCG	0
chr5	131085	131093	chr5_131085_131093_+	1. OR;XO;PBXO	+	1. OR;XO;PBXO	736.124	2452.58	2876.04	94.4245	1238.58	5.35e-05	CTTACCCG	0
chr4	1279489	1279497	chr4_1279489_1279497_+	1. OR;XO;PBXO	+	1. OR;XO;PBXO	90.7072	2446.47	65.4412	12.249	445.588	0.000249	CTAACCCG	1
chr5	151105	151113	chr5_151105_151113_+	1. OR;XO;PBXO	+	1. OR;XO;PBXO	580.875	2445.75	4077.59	19.4141	419.91	5.35e-05	CTTACCCG	0
chr3	94474	94482	chr3_94474_94482_-	1. OR;XO;PBXO	-	1. OR;XO;PBXO	1315.25	2441.07	3715.98	103.314	504.497	2.67e-05	ATTACCCG	0
chr8	456387	456395	chr8_456387_456395_-	1. OR;XO;PBXO	-	1. OR;XO;PBXO	202.347	2439.27	1515.94	21.9709	504.497	2.67e-05	ATTACCCG	0
chr10	60270	60278	chr10_60270_60278_-	1. OR;XO;PBXO	-	1. OR;XO;PBXO	655.883	2433.16	1024.8	33.5064	850.394	1.21e-05	GTTACCCG	0
chr16	643652	643660	chr16_643652_643660_+	1. OR;XO;PBXO	+	1. OR;XO;PBXO	2913.1	2412.65	2450.33	23.7548	610.229	0.00043	CCTACCCG	1
chr4	940983	940991	chr4_940983_940991_-	1. OR;XO;PBXO	-	1. OR;XO;PBXO	317.475	2411.93	1838.43	56.2504	1140.4	0.000282	ATTACCCA	1
chr12	196679	196687	chr12_196679_196687_+	1. OR;XO;PBXO	+	1. OR;XO;PBXO	444.814	2409.78	1162.42	95.1975	361.002	0.00043	CCTACCCG	1
chr7	76678	76686	chr7_76678_76686_+	1. OR;XO;PBXO	+	1. OR;XO;PBXO	170.948	2409.42	1774.33	7.10562	419.91	0.00042	CTTACCCA	1
chr11	125	133	chr11_125_133_+	1. OR;XO;PBXO	+	1. OR;XO;PBXO	6044.24	2406.9	3769.28	35.9741	0	7.13e-05	ATTACCCT	0
chr14	602422	602430	chr14_602422_602430_+	1. OR;XO;PBXO	+	1. OR;XO;PBXO	326.197	2388.91	2520.5	5.70828	573.978	8.6e-05	CTTACCCT	0
chr4	694293	694301	chr4_694293_694301_-	1. OR;XO;PBXO	-	1. OR;XO;PBXO	340.152	2375.6	1595.55	110.806	382.149	0.000405	GTTCCCCG	1
chr7	609906	609914	chr7_609906_609914_+	1. OR;XO;PBXO	+	1. OR;XO;PBXO	6197.74	2373.08	6612.26	29.1955	1235.56	1.21e-05	GTTACCCG	0
chr13	14863	14871	chr13_14863_14871_-	1. OR;XO;PBXO	-	1. OR;XO;PBXO	2677.61	2361.93	4039.81	112.709	1152.49	1.21e-05	GTTACCCG	0
chr8	53287	53295	chr8_53287_53295_+	1. OR;XO;PBXO	+	1. OR;XO;PBXO	87.2185	2353.66	563.334	8.74081	385.17	2.67e-05	ATTACCCG	0
chr16	450952	450960	chr16_450952_450960_+	1. OR;XO;PBXO	+	1. OR;XO;PBXO	511.1	2352.22	2994.1	12.4869	1450.05	4.14e-05	GTTACCCT	0
chr15	1036650	1036658	chr15_1036650_1036658_-	1. OR;XO;PBXO	-	1. OR;XO;PBXO	209.324	2350.42	371.058	146.513	826.226	0.000198	GTAACCCT	1
chr14	619922	619930	chr14_619922_619930_-	1. OR;XO;PBXO	-	1. OR;XO;PBXO	702.981	2348.26	2565.7	74.1482	672.159	4.14e-05	GTTACCCT	0
chr16	482124	482132	chr16_482124_482132_+	1. OR;XO;PBXO	+	1. OR;XO;PBXO	919.283	2348.26	1375.61	39.6607	673.669	7.13e-05	ATTACCCT	0
chr10	123533	123541	chr10_123533_123541_-	1. OR;XO;PBXO	-	1. OR;XO;PBXO	7865.36	2345.75	8703.68	29.909	3307.93	0.000198	GTAACCCT	1
chr10	123536	123544	chr10_123536_123544_+	1. OR;XO;PBXO	+	1. OR;XO;PBXO	7647.32	2345.39	6918.55	29.909	3309.44	1.21e-05	GTTACCCG	0
chr5	541549	541557	chr5_541549_541557_-	1. OR;XO;PBXO	-	1. OR;XO;PBXO	481.446	2322.72	3684.95	102.244	471.266	2.67e-05	ATTACCCG	0
chr6	106495	106503	chr6_106495_106503_+	1. OR;XO;PBXO	+	1. OR;XO;PBXO	849.508	2318.41	3319.96	16.1735	3622.1	4.14e-05	GTTACCCT	0
chr16	643643	643651	chr16_643643_643651_+	1. OR;XO;PBXO	+	1. OR;XO;PBXO	2740.4	2315.89	2391.64	23.7548	619.292	7.13e-05	ATTACCCT	0
chr2	578213	578221	chr2_578213_578221_+	1. OR;XO;PBXO	+	1. OR;XO;PBXO	244.212	2310.49	615.957	75.0996	427.463	2.67e-05	ATTACCCG	0
chr15	238473	238481	chr15_238473_238481_-	1. OR;XO;PBXO	-	1. OR;XO;PBXO	218.046	2310.49	894.588	54.199	293.031	0.000249	CTAACCCG	1
chr15	769525	769533	chr15_769525_769533_-	1. OR;XO;PBXO	-	1. OR;XO;PBXO	102.918	2310.49	441.897	2.97306	353.45	2.67e-05	ATTACCCG	0
chr4	524876	524884	chr4_524876_524884_-	1. OR;XO;PBXO	-	1. OR;XO;PBXO	1125.12	2310.49	5656.28	94.5434	1388.12	0.000159	GTCACCCT	1
chr16	454324	454332	chr16_454324_454332_-	1. OR;XO;PBXO	-	1. OR;XO;PBXO	331.43	2310.13	2589.99	18.879	469.756	0.000173	GTTACCCA	1
chr4	524879	524887	chr4_524879_524887_+	1. OR;XO;PBXO	+	1. OR;XO;PBXO	1109.42	2310.13	5655.6	94.5434	1388.12	0.000364	GTGACCCG	1
chr16	454327	454335	chr16_454327_454335_+	1. OR;XO;PBXO	+	1. OR;XO;PBXO	343.641	2306.9	3091.93	18.879	469.756	0.000198	GTAACCCT	1
chr11	580280	580288	chr11_580280_580288_+	1. OR;XO;PBXO	+	1. OR;XO;PBXO	966.381	2299.7	5480.87	62.8506	413.868	0.000173	GTTACCCA	1
chr4	393468	393476	chr4_393468_393476_+	1. OR;XO;PBXO	+	1. OR;XO;PBXO	3391.05	2299.7	13707.6	43.05	2362.37	1.21e-05	GTTACCCG	0
chr7	676849	676857	chr7_676849_676857_-	1. OR;XO;PBXO	-	1. OR;XO;PBXO	228.512	2299.34	4631.48	4.57852	416.889	4.14e-05	GTTACCCT	0
chr7	676856	676864	chr7_676856_676864_+	1. OR;XO;PBXO	+	1. OR;XO;PBXO	225.024	2295.02	5107.11	4.57852	407.827	0.000805	CATACCCG	1
chr2	23901	23909	chr2_23901_23909_+	1. OR;XO;PBXO	+	1. OR;XO;PBXO	232.001	2295.02	2041.5	29.7901	590.593	0.000364	GTGACCCG	1
chr4	74269	74277	chr4_74269_74277_+	1. OR;XO;PBXO	+	1. OR;XO;PBXO	512.845	2294.67	6261.44	48.5204	438.036	0.000198	GTAACCCT	1
chr4	74266	74274	chr4_74266_74274_-	1. OR;XO;PBXO	-	1. OR;XO;PBXO	500.634	2293.95	6243.23	48.5204	438.036	0.000173	GTTACCCA	1
chr2	723114	723122	chr2_723114_723122_+	1. OR;XO;PBXO	+	1. OR;XO;PBXO	383.761	2272.36	4225.34	151.24	738.619	0.000364	GTGACCCG	1
chr14	699586	699594	chr14_699586_699594_+	1. OR;XO;PBXO	+	1. OR;XO;PBXO	2360.13	2268.05	2954.97	161.348	2599.52	1.21e-05	GTTACCCG	0
chr6	130042	130050	chr6_130042_130050_-	1. OR;XO;PBXO	-	1. OR;XO;PBXO	3405.01	2263.01	5672.47	103.909	1431.92	2.67e-05	ATTACCCG	0
chr12	402021	402029	chr12_402021_402029_-	1. OR;XO;PBXO	-	1. OR;XO;PBXO	83.7297	2260.85	1545.63	22.4169	453.141	4.14e-05	GTTACCCT	0
chr11	382960	382968	chr11_382960_382968_-	1. OR;XO;PBXO	-	1. OR;XO;PBXO	777.989	2250.06	2947.55	16.2032	620.803	0.000183	GCTACCCG	1
chr16	689887	689895	chr16_689887_689895_+	1. OR;XO;PBXO	+	1. OR;XO;PBXO	251.189	2248.62	1926.8	97.0111	516.58	7.13e-05	ATTACCCT	0
chr13	782506	782514	chr13_782506_782514_-	1. OR;XO;PBXO	-	1. OR;XO;PBXO	873.929	2245.74	1949.74	348.651	1172.12	2.67e-05	ATTACCCG	0
chr15	851971	851979	chr15_851971_851979_-	1. OR;XO;PBXO	-	1. OR;XO;PBXO	540.755	2240.35	3910.28	84.7621	660.075	2.67e-05	ATTACCCG	0
chr4	399204	399212	chr4_399204_399212_+	1. OR;XO;PBXO	+	1. OR;XO;PBXO	886.14	2238.19	4636.88	225.21	504.497	2.67e-05	ATTACCCG	0
chr9	244609	244617	chr9_244609_244617_-	1. OR;XO;PBXO	-	1. OR;XO;PBXO	1165.24	2238.19	2500.26	228.302	715.962	2.67e-05	ATTACCCG	0
chr15	989638	989646	chr15_989638_989646_-	1. OR;XO;PBXO	-	1. OR;XO;PBXO	331.43	2238.19	284.028	125.761	528.664	0.000213	TTTACCCG	1
chr16	207811	207819	chr16_207811_207819_+	1. OR;XO;PBXO	+	1. OR;XO;PBXO	76.7523	2232.79	555.913	7.34347	422.931	0.000159	ATAACCCG	1
chr5	532383	532391	chr5_532383_532391_-	1. OR;XO;PBXO	-	1. OR;XO;PBXO	109.895	2230.99	672.628	6.00559	435.015	2.67e-05	ATTACCCG	0
chr7	157726	157734	chr7_157726_157734_-	1. OR;XO;PBXO	-	1. OR;XO;PBXO	2164.76	2230.27	7375.97	292.936	1737.04	2.67e-05	ATTACCCG	0
chr2	196039	196047	chr2_196039_196047_-	1. OR;XO;PBXO	-	1. OR;XO;PBXO	66.286	2229.2	1349.98	4.28121	397.253	7.13e-05	ATTACCCT	0
chr14	233863	233871	chr14_233863_233871_+	1. OR;XO;PBXO	+	1. OR;XO;PBXO	1098.95	2229.2	1772.98	101.471	1170.61	4.14e-05	GTTACCCT	0
chr14	233871	233879	chr14_233871_233879_+	1. OR;XO;PBXO	+	1. OR;XO;PBXO	1135.58	2227.04	1789.18	101.471	1170.61	5.35e-05	CTTACCCG	0
chr7	756830	756838	chr7_756830_756838_-	1. OR;XO;PBXO	-	1. OR;XO;PBXO	392.483	2226.32	1096.98	68.5291	575.489	0.000159	ATAACCCG	1
chr13	171699	171707	chr13_171699_171707_+	1. OR;XO;PBXO	+	1. OR;XO;PBXO	66.286	2215.53	858.831	5.73801	431.994	0.000237	ATTACCCC	1
chr4	512031	512039	chr4_512031_512039_+	1. OR;XO;PBXO	+	1. OR;XO;PBXO	62.7973	2215.53	375.106	2.70549	435.015	0.000294	ACTACCCG	1
chr10	559285	559293	chr10_559285_559293_-	1. OR;XO;PBXO	-	1. OR;XO;PBXO	537.266	2210.49	2526.57	169.405	501.476	9.59e-05	GTCACCCG	1
chr13	897746	897754	chr13_897746_897754_-	1. OR;XO;PBXO	-	1. OR;XO;PBXO	1432.13	2210.49	955.981	61.364	2445.45	5.35e-05	CTTACCCG	0
chr7	393804	393812	chr7_393804_393812_-	1. OR;XO;PBXO	-	1. OR;XO;PBXO	1050.11	2210.49	2283.02	150.259	555.852	0.000183	GCTACCCG	1
chr13	192024	192032	chr13_192024_192032_-	1. OR;XO;PBXO	-	1. OR;XO;PBXO	2872.98	2207.61	764.38	99.5679	2421.28	2.67e-05	ATTACCCG	0
chr5	422635	422643	chr5_422635_422643_-	1. OR;XO;PBXO	-	1. OR;XO;PBXO	177.926	2206.53	86.3554	13.0815	1102.64	0.000405	GTTGCCCG	1
chr11	66970	66978	chr11_66970_66978_-	1. OR;XO;PBXO	-	1. OR;XO;PBXO	64.5417	2202.22	377.805	2.31899	501.476	4.14e-05	GTTACCCT	0
chr3	137186	137194	chr3_137186_137194_+	1. OR;XO;PBXO	+	1. OR;XO;PBXO	493.657	2195.38	1883.63	18.2843	1223.48	4.14e-05	GTTACCCT	0
chr13	675352	675360	chr13_675352_675360_+	1. OR;XO;PBXO	+	1. OR;XO;PBXO	1388.52	2192.86	66.7905	7.34347	377.617	8.6e-05	CTTACCCT	0
chr9	41670	41678	chr9_41670_41678_+	1. OR;XO;PBXO	+	1. OR;XO;PBXO	1011.73	2173.44	2044.87	48.6393	590.593	7.13e-05	ATTACCCT	0
chr13	26293	26301	chr13_26293_26301_-	1. OR;XO;PBXO	-	1. OR;XO;PBXO	204.091	2159.77	3080.46	21.525	460.693	0.000405	GTTGCCCG	1
chr12	329558	329566	chr12_329558_329566_+	1. OR;XO;PBXO	+	1. OR;XO;PBXO	1297.81	2156.89	1955.81	29.2252	359.492	2.67e-05	ATTACCCG	0
chr16	682069	682077	chr16_682069_682077_+	1. OR;XO;PBXO	+	1. OR;XO;PBXO	4997.62	2155.09	7591.85	351.922	836.8	1.21e-05	GTTACCCG	0
chr8	443629	443637	chr8_443629_443637_-	1. OR;XO;PBXO	-	1. OR;XO;PBXO	2210.12	2153.29	17638.8	300.666	3354.75	1.21e-05	GTTACCCG	0
chr11	526757	526765	chr11_526757_526765_-	1. OR;XO;PBXO	-	1. OR;XO;PBXO	397.716	2151.5	501.941	82.6215	462.203	2.67e-05	ATTACCCG	0
chr15	61233	61241	chr15_61233_61241_+	1. OR;XO;PBXO	+	1. OR;XO;PBXO	610.529	2149.7	6977.92	138.069	728.046	0.000213	TTTACCCG	1
chr4	722625	722633	chr4_722625_722633_+	1. OR;XO;PBXO	+	1. OR;XO;PBXO	279.099	2145.02	3471.76	21.0196	362.512	0.000237	ATTACCCC	1
chr7	584682	584690	chr7_584682_584690_+	1. OR;XO;PBXO	+	1. OR;XO;PBXO	863.463	2142.14	2584.59	107.625	877.582	5.35e-05	CTTACCCG	0
chr10	706097	706105	chr10_706097_706105_+	1. OR;XO;PBXO	+	1. OR;XO;PBXO	186.648	2139.98	1266.32	3.56768	338.345	7.13e-05	ATTACCCT	0
chr16	664827	664835	chr16_664827_664835_-	1. OR;XO;PBXO	-	1. OR;XO;PBXO	123.85	2139.63	737.394	67.3696	431.994	0.000183	GCTACCCG	1
chr10	424282	424290	chr10_424282_424290_+	1. OR;XO;PBXO	+	1. OR;XO;PBXO	1552.49	2134.59	2839.61	41.4148	3880.39	2.67e-05	ATTACCCG	0
chr16	444406	444414	chr16_444406_444414_+	1. OR;XO;PBXO	+	1. OR;XO;PBXO	1072.79	2132.43	6369.39	320.823	1015.03	1.21e-05	GTTACCCG	0
chr11	229149	229157	chr11_229149_229157_+	1. OR;XO;PBXO	+	1. OR;XO;PBXO	1289.09	2130.99	1862.04	10.3165	533.195	0.000354	CTTACCCC	1
chr3	213974	213982	chr3_213974_213982_+	1. OR;XO;PBXO	+	1. OR;XO;PBXO	115.128	2129.91	713.107	275.217	635.907	0.000937	ATAACCCC	2
chr16	821585	821593	chr16_821585_821593_+	1. OR;XO;PBXO	+	1. OR;XO;PBXO	807.643	2125.6	1099.01	55.8936	1502.92	2.67e-05	ATTACCCG	0
chr15	877927	877935	chr15_877927_877935_-	1. OR;XO;PBXO	-	1. OR;XO;PBXO	3284.65	2125.6	8779.92	29.9685	1699.28	2.67e-05	ATTACCCG	0
chr11	429162	429170	chr11_429162_429170_-	1. OR;XO;PBXO	-	1. OR;XO;PBXO	125.595	2111.93	0.674652	3.00279	339.855	0.000159	ATAACCCG	1
chr6	90845	90853	chr6_90845_90853_+	1. OR;XO;PBXO	+	1. OR;XO;PBXO	5320.33	2111.93	4224.67	12.7247	1666.05	0.000198	GTAACCCT	1
chr15	55439	55447	chr15_55439_55447_+	1. OR;XO;PBXO	+	1. OR;XO;PBXO	603.552	2106.17	1555.07	153.826	854.925	0.000364	GTGACCCG	1
chr15	55428	55436	chr15_55428_55436_-	1. OR;XO;PBXO	-	1. OR;XO;PBXO	638.439	2100.78	1555.07	153.826	835.289	0.000471	ACTACCCT	1
chr15	52952	52960	chr15_52952_52960_-	1. OR;XO;PBXO	-	1. OR;XO;PBXO	179.67	2077.75	787.993	137.415	456.162	1.21e-05	GTTACCCG	0
chr4	211281	211289	chr4_211281_211289_-	1. OR;XO;PBXO	-	1. OR;XO;PBXO	3368.38	2076.67	4844.67	88.7757	1105.66	0.000108	GTAACCCG	1
chr8	374554	374562	chr8_374554_374562_-	1. OR;XO;PBXO	-	1. OR;XO;PBXO	1789.72	2074.88	6567.73	83.5431	669.138	0.000132	GTTACCCC	1
chr4	330606	330614	chr4_330606_330614_-	1. OR;XO;PBXO	-	1. OR;XO;PBXO	1686.81	2073.44	7079.12	86.9919	3862.27	0.000159	GTCACCCT	1
chr4	330609	330617	chr4_330609_330617_+	1. OR;XO;PBXO	+	1. OR;XO;PBXO	1686.81	2072	7135.79	86.9919	3866.8	0.000546	GTGACCCT	1
chr16	667526	667534	chr16_667526_667534_-	1. OR;XO;PBXO	-	1. OR;XO;PBXO	1173.96	2070.92	2592.01	774.513	969.721	1.21e-05	GTTACCCG	0
chr5	292824	292832	chr5_292824_292832_-	1. OR;XO;PBXO	-	1. OR;XO;PBXO	1404.22	2069.84	1369.54	159.327	1052.8	1.21e-05	GTTACCCG	0
chr15	820315	820323	chr15_820315_820323_+	1. OR;XO;PBXO	+	1. OR;XO;PBXO	737.868	2069.48	1579.36	92.7893	453.141	2.67e-05	ATTACCCG	0
chr7	513031	513039	chr7_513031_513039_-	1. OR;XO;PBXO	-	1. OR;XO;PBXO	1133.84	2066.6	3147.92	356.322	1752.14	2.67e-05	ATTACCCG	0
chr4	498331	498339	chr4_498331_498339_-	1. OR;XO;PBXO	-	1. OR;XO;PBXO	64.5417	2065.16	195.649	2.79468	404.806	2.67e-05	ATTACCCG	0
chr7	1061757	1061765	chr7_1061757_1061765_+	1. OR;XO;PBXO	+	1. OR;XO;PBXO	922.771	2051.49	5672.47	160.635	1808.03	1.21e-05	GTTACCCG	0
chr13	51469	51477	chr13_51469_51477_-	1. OR;XO;PBXO	-	1. OR;XO;PBXO	388.994	2051.49	1148.26	87.3486	506.007	0.000183	GCTACCCG	1
chr9	380962	380970	chr9_380962_380970_-	1. OR;XO;PBXO	-	1. OR;XO;PBXO	2089.75	2048.98	6762.71	169.078	3957.43	2.67e-05	ATTACCCG	0
chr15	109613	109621	chr15_109613_109621_-	1. OR;XO;PBXO	-	1. OR;XO;PBXO	568.664	2048.26	77.5849	8.08673	604.187	0.000213	TTTACCCG	1
chr12	100694	100702	chr12_100694_100702_-	1. OR;XO;PBXO	-	1. OR;XO;PBXO	450.047	2043.58	1362.12	118.328	475.798	0.00012	ATCACCCG	1
chr6	184017	184025	chr6_184017_184025_-	1. OR;XO;PBXO	-	1. OR;XO;PBXO	362.829	2028.83	1783.1	15.787	622.313	0.000704	CGTACCCG	1
chr10	257115	257123	chr10_257115_257123_-	1. OR;XO;PBXO	-	1. OR;XO;PBXO	312.242	2028.47	1403.95	40.7607	450.12	4.14e-05	GTTACCCT	0
chr7	757516	757524	chr7_757516_757524_+	1. OR;XO;PBXO	+	1. OR;XO;PBXO	830.32	2028.11	2043.52	114.166	493.923	5.35e-05	CTTACCCG	0
chr15	47712	47720	chr15_47712_47720_-	1. OR;XO;PBXO	-	1. OR;XO;PBXO	1212.34	2022.36	2506.33	139.08	835.289	1.21e-05	GTTACCCG	0
chr14	479363	479371	chr14_479363_479371_+	1. OR;XO;PBXO	+	1. OR;XO;PBXO	5191.24	2020.92	4694.23	26.3116	5378.78	0.000213	TTTACCCG	1
chr16	49110	49118	chr16_49110_49118_-	1. OR;XO;PBXO	-	1. OR;XO;PBXO	2283.38	2017.32	2743.13	161.973	3203.7	0.000849	ATTCCCCT	1
chr16	228434	228442	chr16_228434_228442_-	1. OR;XO;PBXO	-	1. OR;XO;PBXO	66.286	2016.6	0	8.11647	383.659	2.67e-05	ATTACCCG	0
chr14	88939	88947	chr14_88939_88947_-	1. OR;XO;PBXO	-	1. OR;XO;PBXO	1020.46	2015.52	2185.2	38.1444	534.706	0.00012	ATCACCCG	1
chr10	207674	207682	chr10_207674_207682_+	1. OR;XO;PBXO	+	1. OR;XO;PBXO	2283.38	2011.56	1821.56	28.7495	1238.58	5.35e-05	CTTACCCG	0
chr4	556863	556871	chr4_556863_556871_-	1. OR;XO;PBXO	-	1. OR;XO;PBXO	849.508	2006.53	3113.52	61.5722	2791.35	2.67e-05	ATTACCCG	0
chr14	479350	479358	chr14_479350_479358_+	1. OR;XO;PBXO	+	1. OR;XO;PBXO	5020.3	1989.98	3898.81	26.3116	5395.39	1.21e-05	GTTACCCG	0
chr11	101121	101129	chr11_101121_101129_-	1. OR;XO;PBXO	-	1. OR;XO;PBXO	245.956	1989.26	1004.56	17.0951	658.564	4.14e-05	GTTACCCT	0
chr4	1483614	1483622	chr4_1483614_1483622_-	1. OR;XO;PBXO	-	1. OR;XO;PBXO	340.152	1984.23	1629.96	349.692	957.637	4.14e-05	GTTACCCT	0
chr7	897344	897352	chr7_897344_897352_+	1. OR;XO;PBXO	+	1. OR;XO;PBXO	811.132	1975.95	1165.12	306.345	635.907	1.21e-05	GTTACCCG	0
chr7	843705	843713	chr7_843705_843713_+	1. OR;XO;PBXO	+	1. OR;XO;PBXO	1409.45	1963.36	6664.88	310.804	1370	1.21e-05	GTTACCCG	0
chr16	207817	207825	chr16_207817_207825_-	1. OR;XO;PBXO	-	1. OR;XO;PBXO	73.2635	1961.2	555.913	7.34347	435.015	0.000486	GTTAACCG	1
chr9	142548	142556	chr9_142548_142556_-	1. OR;XO;PBXO	-	1. OR;XO;PBXO	474.468	1960.48	1493	36.3903	552.832	0.000223	CTCACCCG	1
chr3	178909	178917	chr3_178909_178917_+	1. OR;XO;PBXO	+	1. OR;XO;PBXO	2796.22	1957.25	3808.41	162.002	1215.93	2.67e-05	ATTACCCG	0
chr13	880998	881006	chr13_880998_881006_-	1. OR;XO;PBXO	-	1. OR;XO;PBXO	484.935	1956.53	2370.05	26.2819	856.436	5.35e-05	CTTACCCG	0
chr14	485426	485434	chr14_485426_485434_-	1. OR;XO;PBXO	-	1. OR;XO;PBXO	769.267	1954.73	3411.71	140.983	1462.13	1.21e-05	GTTACCCG	0
chr10	187911	187919	chr10_187911_187919_-	1. OR;XO;PBXO	-	1. OR;XO;PBXO	1083.25	1954.73	91.078	69.867	1386.61	1.21e-05	GTTACCCG	0
chr3	242489	242497	chr3_242489_242497_-	1. OR;XO;PBXO	-	1. OR;XO;PBXO	120.361	1952.21	3453.54	24.7359	357.981	1.21e-05	GTTACCCG	0
chr16	203052	203060	chr16_203052_203060_+	1. OR;XO;PBXO	+	1. OR;XO;PBXO	422.137	1946.81	1932.88	56.2206	533.195	7.13e-05	ATTACCCT	0
chr4	442472	442480	chr4_442472_442480_-	1. OR;XO;PBXO	-	1. OR;XO;PBXO	554.709	1946.45	1598.92	125.374	592.104	2.67e-05	ATTACCCG	0
chr2	291724	291732	chr2_291724_291732_+	1. OR;XO;PBXO	+	1. OR;XO;PBXO	62.7973	1938.18	935.742	1.81357	406.316	0.000173	GTTACCCA	1
chr2	291721	291729	chr2_291721_291729_-	1. OR;XO;PBXO	-	1. OR;XO;PBXO	62.7973	1938.18	935.742	1.81357	410.847	0.000783	GTAACCCA	2
chr12	212278	212286	chr12_212278_212286_-	1. OR;XO;PBXO	-	1. OR;XO;PBXO	85.4741	1937.46	0.674652	24.3494	309.646	0.000405	GTTGCCCG	1
chr5	332967	332975	chr5_332967_332975_-	1. OR;XO;PBXO	-	1. OR;XO;PBXO	2075.8	1936.38	3527.75	88.5676	779.402	4.14e-05	GTTACCCT	0
chr12	81175	81183	chr12_81175_81183_+	1. OR;XO;PBXO	+	1. OR;XO;PBXO	2143.83	1929.91	4083.67	48.3123	1442.5	1.21e-05	GTTACCCG	0
chr12	83417	83425	chr12_83417_83425_-	1. OR;XO;PBXO	-	1. OR;XO;PBXO	739.613	1926.31	2306.63	32.8821	1086.03	1.21e-05	GTTACCCG	0
chr11	589685	589693	chr11_589685_589693_-	1. OR;XO;PBXO	-	1. OR;XO;PBXO	1378.05	1921.99	1694.72	168.157	1092.07	5.35e-05	CTTACCCG	0
chr14	783814	783822	chr14_783814_783822_-	1. OR;XO;PBXO	-	1. OR;XO;PBXO	3092.77	1919.84	4628.11	1.90276	1823.14	8.6e-05	CTTACCCT	0
chr3	123810	123818	chr3_123810_123818_+	1. OR;XO;PBXO	+	1. OR;XO;PBXO	125.595	1914.08	230.731	4.0731	441.057	0.000198	GTAACCCT	1
chr3	213948	213956	chr3_213948_213956_-	1. OR;XO;PBXO	-	1. OR;XO;PBXO	193.625	1911.56	825.774	275.217	643.46	2.67e-05	ATTACCCG	0
chr15	315664	315672	chr15_315664_315672_+	1. OR;XO;PBXO	+	1. OR;XO;PBXO	5541.86	1908.32	10323.5	68.4994	1306.56	2.67e-05	ATTACCCG	0
chr7	373018	373026	chr7_373018_373026_+	1. OR;XO;PBXO	+	1. OR;XO;PBXO	80.241	1902.57	581.55	5.85694	499.965	8.6e-05	CTTACCCT	0
chr8	456379	456387	chr8_456379_456387_-	1. OR;XO;PBXO	-	1. OR;XO;PBXO	183.159	1900.41	1410.7	21.9709	510.538	0.00043	CCTACCCG	1
chr4	78091	78099	chr4_78091_78099_-	1. OR;XO;PBXO	-	1. OR;XO;PBXO	1969.39	1900.05	1599.6	44.8933	401.785	0.000213	TTTACCCG	1
chr4	526180	526188	chr4_526180_526188_+	1. OR;XO;PBXO	+	1. OR;XO;PBXO	225.024	1899.33	1177.94	5.26232	472.777	2.67e-05	ATTACCCG	0
chr10	359864	359872	chr10_359864_359872_-	1. OR;XO;PBXO	-	1. OR;XO;PBXO	1212.34	1897.89	2245.92	51.4043	1699.28	1.21e-05	GTTACCCG	0
chr12	129999	130007	chr12_129999_130007_+	1. OR;XO;PBXO	+	1. OR;XO;PBXO	708.214	1889.98	1061.23	16.8275	637.418	8.6e-05	CTTACCCT	0
chr6	90842	90850	chr6_90842_90850_-	1. OR;XO;PBXO	-	1. OR;XO;PBXO	5475.58	1889.98	4224.67	12.7247	1666.05	1.21e-05	GTTACCCG	0
chr15	1034402	1034410	chr15_1034402_1034410_+	1. OR;XO;PBXO	+	1. OR;XO;PBXO	458.769	1888.54	2457.08	120.171	759.766	0.000457	GATACCCG	1
chr7	144236	144244	chr7_144236_144244_+	1. OR;XO;PBXO	+	1. OR;XO;PBXO	683.793	1887.1	1878.9	141.637	2096.53	2.67e-05	ATTACCCG	0
chr15	1034383	1034391	chr15_1034383_1034391_-	1. OR;XO;PBXO	-	1. OR;XO;PBXO	315.731	1884.94	2457.08	120.171	759.766	0.000534	ATTCCCCG	1
chr15	471741	471749	chr15_471741_471749_-	1. OR;XO;PBXO	-	1. OR;XO;PBXO	607.041	1881.34	1784.45	326.026	1073.94	0.000108	GTAACCCG	1
chr15	412595	412603	chr15_412595_412603_+	1. OR;XO;PBXO	+	1. OR;XO;PBXO	1972.88	1881.34	2535.34	113.868	2030.07	1.21e-05	GTTACCCG	0
chr14	372367	372375	chr14_372367_372375_-	1. OR;XO;PBXO	-	1. OR;XO;PBXO	85.4741	1880.27	954.632	13.4977	394.232	0.000223	CTCACCCG	1
chr11	207981	207989	chr11_207981_207989_+	1. OR;XO;PBXO	+	1. OR;XO;PBXO	211.069	1880.27	1412.72	75.278	518.091	8.6e-05	CTTACCCT	0
chr14	372373	372381	chr14_372373_372381_-	1. OR;XO;PBXO	-	1. OR;XO;PBXO	87.2185	1872.71	954.632	13.4977	394.232	0.000849	ATTCCCCT	1
chr16	666140	666148	chr16_666140_666148_-	1. OR;XO;PBXO	-	1. OR;XO;PBXO	123.85	1864.8	0	9.30569	1341.3	0.00012	ATCACCCG	1
chr2	18054	18062	chr2_18054_18062_-	1. OR;XO;PBXO	-	1. OR;XO;PBXO	205.836	1863.36	1021.42	89.4	326.261	0.000282	ATTACCCA	1
chr13	308989	308997	chr13_308989_308997_-	1. OR;XO;PBXO	-	1. OR;XO;PBXO	81.9854	1859.76	0	8.23539	398.764	8.6e-05	CTTACCCT	0
chr7	641881	641889	chr7_641881_641889_-	1. OR;XO;PBXO	-	1. OR;XO;PBXO	226.768	1855.44	2691.86	235.794	394.232	4.14e-05	GTTACCCT	0
chr7	129365	129373	chr7_129365_129373_+	1. OR;XO;PBXO	+	1. OR;XO;PBXO	1205.36	1854.01	1936.92	48.4015	528.664	2.67e-05	ATTACCCG	0
chr4	1081350	1081358	chr4_1081350_1081358_-	1. OR;XO;PBXO	-	1. OR;XO;PBXO	415.16	1852.21	3107.45	18.0762	551.321	7.13e-05	ATTACCCT	0
chr16	340847	340855	chr16_340847_340855_+	1. OR;XO;PBXO	+	1. OR;XO;PBXO	101.173	1851.13	0	5.70828	456.162	0.000198	GTAACCCT	1
chr16	592871	592879	chr16_592871_592879_+	1. OR;XO;PBXO	+	1. OR;XO;PBXO	685.537	1847.89	1440.38	21.8818	522.622	1.21e-05	GTTACCCG	0
chr10	402688	402696	chr10_402688_402696_-	1. OR;XO;PBXO	-	1. OR;XO;PBXO	2313.03	1843.57	3095.98	128.109	1037.69	1.21e-05	GTTACCCG	0
chr7	271410	271418	chr7_271410_271418_+	1. OR;XO;PBXO	+	1. OR;XO;PBXO	479.702	1843.21	3859.68	4.0731	611.74	9.59e-05	GTCACCCG	1
chr5	281492	281500	chr5_281492_281500_+	1. OR;XO;PBXO	+	1. OR;XO;PBXO	1596.1	1841.06	4583.58	71.4427	2016.48	2.67e-05	ATTACCCG	0
chr10	663590	663598	chr10_663590_663598_-	1. OR;XO;PBXO	-	1. OR;XO;PBXO	1219.31	1837.1	2639.91	99.5679	320.219	4.14e-05	GTTACCCT	0
chr12	1053253	1053261	chr12_1053253_1053261_-	1. OR;XO;PBXO	-	1. OR;XO;PBXO	579.131	1837.1	2546.14	50.8097	454.651	2.67e-05	ATTACCCG	0
chr15	853975	853983	chr15_853975_853983_-	1. OR;XO;PBXO	-	1. OR;XO;PBXO	191.881	1837.1	3414.41	18.0762	475.798	0.000108	GTAACCCG	1
chr4	569946	569954	chr4_569946_569954_+	1. OR;XO;PBXO	+	1. OR;XO;PBXO	675.071	1832.78	2366	8.41377	350.429	2.67e-05	ATTACCCG	0
chr5	171960	171968	chr5_171960_171968_-	1. OR;XO;PBXO	-	1. OR;XO;PBXO	80.241	1832.78	612.584	52.0286	368.554	9.59e-05	GTCACCCG	1
chr15	444426	444434	chr15_444426_444434_+	1. OR;XO;PBXO	+	1. OR;XO;PBXO	193.625	1831.34	1472.09	22.4466	599.656	0.000486	GTTAACCG	1
chr13	547548	547556	chr13_547548_547556_-	1. OR;XO;PBXO	-	1. OR;XO;PBXO	2194.42	1821.63	3404.29	576.983	1161.55	1.21e-05	GTTACCCG	0
chr7	1031670	1031678	chr7_1031670_1031678_-	1. OR;XO;PBXO	-	1. OR;XO;PBXO	111.64	1817.31	1878.23	37.0444	306.625	2.67e-05	ATTACCCG	0
chr4	61410	61418	chr4_61410_61418_-	1. OR;XO;PBXO	-	1. OR;XO;PBXO	88.9628	1815.88	533.649	7.34347	465.224	0.000386	GGTACCCG	1
chr8	120186	120194	chr8_120186_120194_+	1. OR;XO;PBXO	+	1. OR;XO;PBXO	95.9403	1815.52	727.274	14.0923	552.832	8.6e-05	CTTACCCT	0
chr15	444424	444432	chr15_444424_444432_-	1. OR;XO;PBXO	-	1. OR;XO;PBXO	195.369	1811.2	1472.09	22.4466	599.656	0.000741	GTTAACCT	1
chr16	578181	578189	chr16_578181_578189_+	1. OR;XO;PBXO	+	1. OR;XO;PBXO	80.241	1806.52	1582.06	2.67576	267.353	0.000108	GTAACCCG	1
chr13	30000	30008	chr13_30000_30008_+	1. OR;XO;PBXO	+	1. OR;XO;PBXO	3078.81	1806.52	4458.1	188.433	2616.13	1.21e-05	GTTACCCG	0
chr12	934331	934339	chr12_934331_934339_+	1. OR;XO;PBXO	+	1. OR;XO;PBXO	223.279	1803.64	1853.94	361.346	1172.12	4.14e-05	GTTACCCT	0
chr7	217380	217388	chr7_217380_217388_+	1. OR;XO;PBXO	+	1. OR;XO;PBXO	4019.03	1803.64	1803.34	637.693	1808.03	1.21e-05	GTTACCCG	0
chr6	184142	184150	chr6_184142_184150_+	1. OR;XO;PBXO	+	1. OR;XO;PBXO	1831.59	1803.29	4043.86	25.1819	555.852	4.14e-05	GTTACCCT	0
chr13	408472	408480	chr13_408472_408480_+	1. OR;XO;PBXO	+	1. OR;XO;PBXO	286.077	1799.33	469.557	3.92444	265.842	0.000937	ATCACCCA	2
chr2	202482	202490	chr2_202482_202490_-	1. OR;XO;PBXO	-	1. OR;XO;PBXO	312.242	1798.97	2553.56	11.5355	509.028	9.59e-05	GTCACCCG	1
chr13	832113	832121	chr13_832113_832121_-	1. OR;XO;PBXO	-	1. OR;XO;PBXO	1287.34	1795.37	5464.68	182.873	3107.03	1.21e-05	GTTACCCG	0
chr4	211266	211274	chr4_211266_211274_-	1. OR;XO;PBXO	-	1. OR;XO;PBXO	3190.45	1793.93	4230.07	88.7757	1104.15	2.67e-05	ATTACCCG	0
chr9	68304	68312	chr9_68304_68312_-	1. OR;XO;PBXO	-	1. OR;XO;PBXO	2436.88	1787.82	6617.66	98.676	1641.88	5.35e-05	CTTACCCG	0
chr12	198625	198633	chr12_198625_198633_+	1. OR;XO;PBXO	+	1. OR;XO;PBXO	1081.51	1786.74	2607.53	158.256	492.413	4.14e-05	GTTACCCT	0
chr7	625560	625568	chr7_625560_625568_-	1. OR;XO;PBXO	-	1. OR;XO;PBXO	139.55	1783.86	103.896	4.22175	430.484	0.000354	CTTACCCC	1
chr15	829630	829638	chr15_829630_829638_-	1. OR;XO;PBXO	-	1. OR;XO;PBXO	78.4966	1781.34	300.22	11.2976	380.638	1.21e-05	GTTACCCG	0
chr15	841174	841182	chr15_841174_841182_-	1. OR;XO;PBXO	-	1. OR;XO;PBXO	247.7	1780.98	2287.07	198.095	1114.73	0.000294	ACTACCCG	1
chr2	628160	628168	chr2_628160_628168_-	1. OR;XO;PBXO	-	1. OR;XO;PBXO	828.575	1778.82	1308.82	20.9601	2230.96	4.14e-05	GTTACCCT	0
chr7	932100	932108	chr7_932100_932108_-	1. OR;XO;PBXO	-	1. OR;XO;PBXO	699.492	1778.46	5001.87	283.601	1016.55	0.000849	ATTGCCCT	1
chr13	632103	632111	chr13_632103_632111_+	1. OR;XO;PBXO	+	1. OR;XO;PBXO	2402	1769.11	7044.71	55.6855	3977.06	2.67e-05	ATTACCCG	0
chr12	877546	877554	chr12_877546_877554_-	1. OR;XO;PBXO	-	1. OR;XO;PBXO	5430.22	1769.11	10635.2	75.0104	5318.36	1.21e-05	GTTACCCG	0
chr14	281655	281663	chr14_281655_281663_+	1. OR;XO;PBXO	+	1. OR;XO;PBXO	1153.03	1767.31	2614.27	98.5273	1344.32	0.000386	GGTACCCG	1
chr7	905068	905076	chr7_905068_905076_-	1. OR;XO;PBXO	-	1. OR;XO;PBXO	1297.81	1755.8	6189.25	72.6617	605.698	2.67e-05	ATTACCCG	0
chr10	615322	615330	chr10_615322_615330_+	1. OR;XO;PBXO	+	1. OR;XO;PBXO	1749.6	1754	3444.1	228.748	2162.99	2.67e-05	ATTACCCG	0
chr1	45552	45560	chr1_45552_45560_-	1. OR;XO;PBXO	-	1. OR;XO;PBXO	183.159	1752.2	240.176	3.00279	335.324	2.67e-05	ATTACCCG	0
chr2	270559	270567	chr2_270559_270567_-	1. OR;XO;PBXO	-	1. OR;XO;PBXO	61.0529	1751.13	93.7766	1.81357	282.458	0.000132	GTTACCCC	1
chr15	212100	212108	chr15_212100_212108_+	1. OR;XO;PBXO	+	1. OR;XO;PBXO	170.948	1750.41	2438.19	149.902	376.107	4.14e-05	GTTACCCT	0
chr4	1525275	1525283	chr4_1525275_1525283_-	1. OR;XO;PBXO	-	1. OR;XO;PBXO	3963.21	1748.97	3941.99	32.9118	3378.92	4.14e-05	GTTACCCT	0
chr8	249778	249786	chr8_249778_249786_+	1. OR;XO;PBXO	+	1. OR;XO;PBXO	607.041	1748.97	1308.15	64.2182	632.886	2.67e-05	ATTACCCG	0
chr5	492308	492316	chr5_492308_492316_-	1. OR;XO;PBXO	-	1. OR;XO;PBXO	894.862	1741.41	1679.88	19.7709	329.282	0.000108	GTAACCCG	1
chr13	101699	101707	chr13_101699_101707_+	1. OR;XO;PBXO	+	1. OR;XO;PBXO	894.862	1739.97	4082.32	118.506	685.753	1.21e-05	GTTACCCG	0
chr14	502352	502360	chr14_502352_502360_-	1. OR;XO;PBXO	-	1. OR;XO;PBXO	933.238	1739.61	891.889	19.533	454.651	0.000386	GGTACCCG	1
chr15	234117	234125	chr15_234117_234125_-	1. OR;XO;PBXO	-	1. OR;XO;PBXO	1730.41	1739.61	7164.13	119.071	1141.91	0.000183	GCTACCCG	1
chr16	408949	408957	chr16_408949_408957_+	1. OR;XO;PBXO	+	1. OR;XO;PBXO	4237.07	1736.74	4777.88	83.6026	2814	2.67e-05	ATTACCCG	0
chr2	79793	79801	chr2_79793_79801_-	1. OR;XO;PBXO	-	1. OR;XO;PBXO	202.347	1731.34	1009.95	27.9765	367.044	7.13e-05	ATTACCCT	0
chr5	42221	42229	chr5_42221_42229_+	1. OR;XO;PBXO	+	1. OR;XO;PBXO	319.22	1727.38	1001.18	7.3732	433.505	0.000249	CTAACCCG	1
chr13	307114	307122	chr13_307114_307122_+	1. OR;XO;PBXO	+	1. OR;XO;PBXO	232.001	1727.02	827.797	9.12731	427.463	0.00051	AGTACCCG	1
chr12	680975	680983	chr12_680975_680983_+	1. OR;XO;PBXO	+	1. OR;XO;PBXO	139.55	1723.07	547.817	55.8936	418.4	0.000364	GTGACCCG	1
chr5	280241	280249	chr5_280241_280249_+	1. OR;XO;PBXO	+	1. OR;XO;PBXO	298.287	1721.27	1326.36	5.9164	492.413	8.6e-05	CTTACCCT	0
chr7	936984	936992	chr7_936984_936992_+	1. OR;XO;PBXO	+	1. OR;XO;PBXO	394.227	1719.83	284.028	141.815	1309.58	2.67e-05	ATTACCCG	0
chr11	352972	352980	chr11_352972_352980_-	1. OR;XO;PBXO	-	1. OR;XO;PBXO	338.408	1717.67	1916.01	21.3466	518.091	9.59e-05	GTCACCCG	1
chr11	317261	317269	chr11_317261_317269_-	1. OR;XO;PBXO	-	1. OR;XO;PBXO	256.422	1717.31	1395.85	16.1437	444.078	0.000108	GTAACCCG	1
chr14	624235	624243	chr14_624235_624243_-	1. OR;XO;PBXO	-	1. OR;XO;PBXO	115.128	1711.56	729.973	8.26512	658.564	4.14e-05	GTTACCCT	0
chr5	192170	192178	chr5_192170_192178_-	1. OR;XO;PBXO	-	1. OR;XO;PBXO	870.44	1710.48	987.015	2.46764	4543.49	0.000294	ACTACCCG	1
chr14	478337	478345	chr14_478337_478345_-	1. OR;XO;PBXO	-	1. OR;XO;PBXO	390.739	1709.04	1066.62	11.5652	398.764	2.67e-05	ATTACCCG	0
chr14	502346	502354	chr14_502346_502354_+	1. OR;XO;PBXO	+	1. OR;XO;PBXO	1196.64	1697.89	1089.56	19.533	454.651	2.67e-05	ATTACCCG	0
chr13	104520	104528	chr13_104520_104528_-	1. OR;XO;PBXO	-	1. OR;XO;PBXO	2358.39	1694.29	8121.46	155.789	1812.56	2.67e-05	ATTACCCG	0
chr16	431753	431761	chr16_431753_431761_-	1. OR;XO;PBXO	-	1. OR;XO;PBXO	172.693	1686.74	267.837	6.09478	438.036	0.000324	GCTACCCT	1
chr16	614662	614670	chr16_614662_614670_+	1. OR;XO;PBXO	+	1. OR;XO;PBXO	1528.07	1684.58	2065.78	175.292	1561.82	2.67e-05	ATTACCCG	0
chr12	5880	5888	chr12_5880_5888_+	1. OR;XO;PBXO	+	1. OR;XO;PBXO	1636.22	1679.54	672.628	183.557	2356.33	5.35e-05	CTTACCCG	0
chr14	417644	417652	chr14_417644_417652_+	1. OR;XO;PBXO	+	1. OR;XO;PBXO	2176.97	1679.54	4715.81	17.8384	1046.75	2.67e-05	ATTACCCG	0
chr15	416041	416049	chr15_416041_416049_-	1. OR;XO;PBXO	-	1. OR;XO;PBXO	675.071	1677.74	3093.28	173.478	527.154	2.67e-05	ATTACCCG	0
chr13	23809	23817	chr13_23809_23817_-	1. OR;XO;PBXO	-	1. OR;XO;PBXO	3436.41	1677.02	3863.05	128.823	1891.11	1.21e-05	GTTACCCG	0
chr4	1469188	1469196	chr4_1469188_1469196_-	1. OR;XO;PBXO	-	1. OR;XO;PBXO	2094.99	1675.58	6335.65	4.13256	903.26	0.000783	GTAACCCA	2
chr4	1469191	1469199	chr4_1469191_1469199_+	1. OR;XO;PBXO	+	1. OR;XO;PBXO	2088.01	1670.91	6336.33	4.13256	913.834	0.000173	GTTACCCA	1
chr4	657626	657634	chr4_657626_657634_-	1. OR;XO;PBXO	-	1. OR;XO;PBXO	1676.34	1670.55	1690.68	35.4389	1028.63	0.000213	TTTACCCG	1
chr14	340160	340168	chr14_340160_340168_+	1. OR;XO;PBXO	+	1. OR;XO;PBXO	6250.08	1670.55	1415.42	126.147	1983.25	1.21e-05	GTTACCCG	0
chr15	609312	609320	chr15_609312_609320_-	1. OR;XO;PBXO	-	1. OR;XO;PBXO	1770.53	1669.47	5479.52	112.739	640.439	1.21e-05	GTTACCCG	0
chr12	921878	921886	chr12_921878_921886_-	1. OR;XO;PBXO	-	1. OR;XO;PBXO	61.0529	1668.75	0	3.71633	302.094	0.000282	ATTACCCA	1
chr7	1084308	1084316	chr7_1084308_1084316_-	1. OR;XO;PBXO	-	1. OR;XO;PBXO	3129.4	1664.43	8094.47	46.5582	3795.81	7.13e-05	ATTACCCT	0
chr14	403046	403054	chr14_403046_403054_+	1. OR;XO;PBXO	+	1. OR;XO;PBXO	71.5191	1658.32	738.743	2.25953	406.316	0.000386	GGTACCCG	1
chr4	1480272	1480280	chr4_1480272_1480280_+	1. OR;XO;PBXO	+	1. OR;XO;PBXO	368.062	1656.88	2390.97	210.612	783.933	1.21e-05	GTTACCCG	0
chr3	51672	51680	chr3_51672_51680_-	1. OR;XO;PBXO	-	1. OR;XO;PBXO	170.948	1651.84	671.953	7.52185	506.007	8.6e-05	CTTACCCT	0
chr10	402669	402677	chr10_402669_402677_-	1. OR;XO;PBXO	-	1. OR;XO;PBXO	1393.75	1651.12	1403.95	128.109	1024.1	0.000312	ATAACCCT	1
chr15	1003372	1003380	chr15_1003372_1003380_+	1. OR;XO;PBXO	+	1. OR;XO;PBXO	280.843	1644.29	1723.73	182.368	578.51	0.000354	CTTACCCC	1
chr12	993027	993035	chr12_993027_993035_+	1. OR;XO;PBXO	+	1. OR;XO;PBXO	61.0529	1643.57	1501.1	49.1447	314.177	0.000198	GTAACCCT	1
chr4	722640	722648	chr4_722640_722648_+	1. OR;XO;PBXO	+	1. OR;XO;PBXO	258.167	1640.33	3471.76	21.0196	383.659	0.000597	GTTCCCCT	1
chr2	652873	652881	chr2_652873_652881_-	1. OR;XO;PBXO	-	1. OR;XO;PBXO	80.241	1639.97	591.669	7.25428	424.442	5.35e-05	CTTACCCG	0
chr10	442668	442676	chr10_442668_442676_-	1. OR;XO;PBXO	-	1. OR;XO;PBXO	293.054	1635.65	1462.64	9.57327	451.63	2.67e-05	ATTACCCG	0
chr5	372153	372161	chr5_372153_372161_-	1. OR;XO;PBXO	-	1. OR;XO;PBXO	1878.69	1631.34	13013.4	354.538	755.234	2.67e-05	ATTACCCG	0
chr7	781613	781621	chr7_781613_781621_-	1. OR;XO;PBXO	-	1. OR;XO;PBXO	1575.17	1629.9	9038.31	177.968	1447.03	1.21e-05	GTTACCCG	0
chr10	339481	339489	chr10_339481_339489_+	1. OR;XO;PBXO	+	1. OR;XO;PBXO	514.589	1628.1	2869.97	32.3172	611.74	7.13e-05	ATTACCCT	0
chr16	108354	108362	chr16_108354_108362_+	1. OR;XO;PBXO	+	1. OR;XO;PBXO	580.875	1624.86	2194.64	45.369	2436.39	2.67e-05	ATTACCCG	0
chr7	845878	845886	chr7_845878_845886_+	1. OR;XO;PBXO	+	1. OR;XO;PBXO	102.918	1624.5	0	1.78384	309.646	0.000364	GTGACCCG	1
chr14	129291	129299	chr14_129291_129299_-	1. OR;XO;PBXO	-	1. OR;XO;PBXO	130.828	1624.5	2252.66	46.2311	397.253	0.000294	ACTACCCG	1
chr15	925385	925393	chr15_925385_925393_+	1. OR;XO;PBXO	+	1. OR;XO;PBXO	3507.93	1623.42	8956.67	36.2417	1031.65	2.67e-05	ATTACCCG	0
chr5	111210	111218	chr5_111210_111218_+	1. OR;XO;PBXO	+	1. OR;XO;PBXO	573.898	1623.06	1748.02	288.982	741.64	2.67e-05	ATTACCCG	0
chr2	504648	504656	chr2_504648_504656_-	1. OR;XO;PBXO	-	1. OR;XO;PBXO	816.365	1621.27	111.318	3.32983	533.195	0.000159	ATAACCCG	1
chr14	403044	403052	chr14_403044_403052_-	1. OR;XO;PBXO	-	1. OR;XO;PBXO	73.2635	1621.27	738.743	2.25953	406.316	0.000573	GGTACCCT	1
chr16	187939	187947	chr16_187939_187947_-	1. OR;XO;PBXO	-	1. OR;XO;PBXO	1487.95	1620.19	586.272	42.931	415.379	0.000198	GTAACCCT	1
chr10	594714	594722	chr10_594714_594722_-	1. OR;XO;PBXO	-	1. OR;XO;PBXO	4053.91	1616.59	7741.63	508.929	1779.33	1.21e-05	GTTACCCG	0
chr8	120195	120203	chr8_120195_120203_-	1. OR;XO;PBXO	-	1. OR;XO;PBXO	94.1959	1611.55	651.713	14.0923	569.447	0.000282	ATTACCCA	1
chr4	417922	417930	chr4_417922_417930_-	1. OR;XO;PBXO	-	1. OR;XO;PBXO	85.4741	1610.47	442.571	6.54074	380.638	0.000132	GTTACCCC	1
chr2	466545	466553	chr2_466545_466553_-	1. OR;XO;PBXO	-	1. OR;XO;PBXO	1051.85	1609.75	2380.17	2.82441	1069.41	0.000223	CTCACCCG	1
chr3	48868	48876	chr3_48868_48876_-	1. OR;XO;PBXO	-	1. OR;XO;PBXO	87.2185	1604.72	452.017	1.93249	484.86	0.000173	GTTACCCA	1
chr5	100550	100558	chr5_100550_100558_+	1. OR;XO;PBXO	+	1. OR;XO;PBXO	2611.32	1603.28	4198.36	22.3872	1249.16	2.67e-05	ATTACCCG	0
chr14	187247	187255	chr14_187247_187255_+	1. OR;XO;PBXO	+	1. OR;XO;PBXO	106.407	1601.84	12.1437	2.34872	502.986	0.000159	GTCACCCT	1
chr7	681266	681274	chr7_681266_681274_+	1. OR;XO;PBXO	+	1. OR;XO;PBXO	193.625	1599.68	1638.05	58.6586	625.334	0.000159	ATAACCCG	1
chr4	746563	746571	chr4_746563_746571_+	1. OR;XO;PBXO	+	1. OR;XO;PBXO	832.064	1597.52	2707.38	29.3739	435.015	2.67e-05	ATTACCCG	0
chr4	842158	842166	chr4_842158_842166_+	1. OR;XO;PBXO	+	1. OR;XO;PBXO	1487.95	1597.16	1279.81	63.2073	351.939	2.67e-05	ATTACCCG	0
chr5	542734	542742	chr5_542734_542742_-	1. OR;XO;PBXO	-	1. OR;XO;PBXO	76.7523	1595.73	497.893	3.74606	451.63	0.000849	ATTGCCCT	1
chr15	1064056	1064064	chr15_1064056_1064064_-	1. OR;XO;PBXO	-	1. OR;XO;PBXO	68.0304	1593.21	879.746	14.0626	353.45	0.000198	GTAACCCT	1
chr5	156617	156625	chr5_156617_156625_+	1. OR;XO;PBXO	+	1. OR;XO;PBXO	1062.32	1593.21	14681.8	84.9107	614.761	1.21e-05	GTTACCCG	0
chr12	725520	725528	chr12_725520_725528_+	1. OR;XO;PBXO	+	1. OR;XO;PBXO	873.929	1588.89	2771.47	128.615	657.054	5.35e-05	CTTACCCG	0
chr2	337079	337087	chr2_337079_337087_-	1. OR;XO;PBXO	-	1. OR;XO;PBXO	2503.17	1587.81	5012.66	67.9642	2286.85	1.21e-05	GTTACCCG	0
chr2	392448	392456	chr2_392448_392456_+	1. OR;XO;PBXO	+	1. OR;XO;PBXO	139.55	1586.73	259.741	13.9437	373.086	0.000173	GTTACCCA	1
chr8	5164	5172	chr8_5164_5172_+	1. OR;XO;PBXO	+	1. OR;XO;PBXO	1454.8	1585.29	2711.42	50.9583	561.894	8.6e-05	CTTACCCT	0
chr13	763227	763235	chr13_763227_763235_-	1. OR;XO;PBXO	-	1. OR;XO;PBXO	1510.62	1584.93	1163.77	99.5085	333.814	0.00012	ATCACCCG	1
chr2	307075	307083	chr2_307075_307083_+	1. OR;XO;PBXO	+	1. OR;XO;PBXO	1967.65	1581.34	669.254	108.041	370.065	0.000213	TTTACCCG	1
chr16	425382	425390	chr16_425382_425390_-	1. OR;XO;PBXO	-	1. OR;XO;PBXO	418.649	1575.58	221.286	1.90276	575.489	0.000294	ACTACCCG	1
chr14	289090	289098	chr14_289090_289098_+	1. OR;XO;PBXO	+	1. OR;XO;PBXO	362.829	1566.59	1953.12	23.3683	1590.52	0.00012	ATCACCCG	1
chr16	789576	789584	chr16_789576_789584_+	1. OR;XO;PBXO	+	1. OR;XO;PBXO	71.5191	1566.23	5149.62	3.80552	382.149	5.35e-05	CTTACCCG	0
chr14	56028	56036	chr14_56028_56036_-	1. OR;XO;PBXO	-	1. OR;XO;PBXO	3084.05	1561.19	3842.82	277.952	2863.85	2.67e-05	ATTACCCG	0
chr7	377316	377324	chr7_377316_377324_+	1. OR;XO;PBXO	+	1. OR;XO;PBXO	1992.07	1557.24	1328.39	287.614	1809.54	1.21e-05	GTTACCCG	0
chr15	256816	256824	chr15_256816_256824_+	1. OR;XO;PBXO	+	1. OR;XO;PBXO	104.662	1556.88	916.851	2.25953	357.981	0.000471	ACTACCCT	1
chr15	357302	357310	chr15_357302_357310_-	1. OR;XO;PBXO	-	1. OR;XO;PBXO	106.407	1554.72	299.545	38.7985	324.751	0.000364	GTGACCCG	1
chr7	932116	932124	chr7_932116_932124_+	1. OR;XO;PBXO	+	1. OR;XO;PBXO	875.673	1550.04	5001.87	283.601	1028.63	2.67e-05	ATTACCCG	0
chr16	425362	425370	chr16_425362_425370_-	1. OR;XO;PBXO	-	1. OR;XO;PBXO	411.671	1547.16	221.286	1.90276	598.146	0.000405	GTTGCCCG	1
chr15	720379	720387	chr15_720379_720387_-	1. OR;XO;PBXO	-	1. OR;XO;PBXO	2433.4	1546.44	1337.16	91.6001	1974.18	5.35e-05	CTTACCCG	0
chr16	641229	641237	chr16_641229_641237_+	1. OR;XO;PBXO	+	1. OR;XO;PBXO	748.334	1542.13	1714.96	42.3959	823.205	0.000183	GCTACCCG	1
chr12	708344	708352	chr12_708344_708352_-	1. OR;XO;PBXO	-	1. OR;XO;PBXO	81.9854	1535.29	37.1058	10.9706	377.617	0.000573	GGTACCCT	1
chr4	1362623	1362631	chr4_1362623_1362631_+	1. OR;XO;PBXO	+	1. OR;XO;PBXO	767.523	1534.57	1580.71	49.9772	415.379	2.67e-05	ATTACCCG	0
chr16	593297	593305	chr16_593297_593305_-	1. OR;XO;PBXO	-	1. OR;XO;PBXO	186.648	1532.77	2001.69	120.201	361.002	2.67e-05	ATTACCCG	0
chr4	599892	599900	chr4_599892_599900_+	1. OR;XO;PBXO	+	1. OR;XO;PBXO	76.7523	1528.1	47.2256	2.6163	315.688	7.13e-05	ATTACCCT	0
chr5	68619	68627	chr5_68619_68627_-	1. OR;XO;PBXO	-	1. OR;XO;PBXO	155.249	1527.02	408.839	3.00279	400.274	0.000405	GTTGCCCG	1
chr13	510499	510507	chr13_510499_510507_-	1. OR;XO;PBXO	-	1. OR;XO;PBXO	4296.38	1525.94	3133.76	136.107	3531.48	1.21e-05	GTTACCCG	0
chr13	584179	584187	chr13_584179_584187_+	1. OR;XO;PBXO	+	1. OR;XO;PBXO	197.114	1525.58	51.9482	60.1748	1012.01	0.000159	ATAACCCG	1
chr12	903488	903496	chr12_903488_903496_+	1. OR;XO;PBXO	+	1. OR;XO;PBXO	1456.55	1524.14	848.712	145.264	1931.89	2.67e-05	ATTACCCG	0
chr15	654081	654089	chr15_654081_654089_-	1. OR;XO;PBXO	-	1. OR;XO;PBXO	64.5417	1523.06	684.771	67.3994	410.847	0.000159	GTCACCCT	1
chr3	286612	286620	chr3_286612_286620_+	1. OR;XO;PBXO	+	1. OR;XO;PBXO	1559.47	1520.54	3538.55	368.392	859.457	1.21e-05	GTTACCCG	0
chr7	144576	144584	chr7_144576_144584_-	1. OR;XO;PBXO	-	1. OR;XO;PBXO	160.482	1519.11	1920.06	5.5299	610.229	2.67e-05	ATTACCCG	0
chr15	304454	304462	chr15_304454_304462_-	1. OR;XO;PBXO	-	1. OR;XO;PBXO	2009.51	1516.95	3781.42	81.5809	670.648	1.21e-05	GTTACCCG	0
chr5	196786	196794	chr5_196786_196794_-	1. OR;XO;PBXO	-	1. OR;XO;PBXO	718.68	1515.51	1785.8	196.936	1072.43	1.21e-05	GTTACCCG	0
chr4	867713	867721	chr4_867713_867721_+	1. OR;XO;PBXO	+	1. OR;XO;PBXO	1121.63	1509.39	3270.71	11.4166	1019.57	9.59e-05	GTCACCCG	1
chr12	81004	81012	chr12_81004_81012_+	1. OR;XO;PBXO	+	1. OR;XO;PBXO	226.768	1506.16	313.713	3.12172	1012.01	0.000213	TTTACCCG	1
chr14	318179	318187	chr14_318179_318187_+	1. OR;XO;PBXO	+	1. OR;XO;PBXO	301.776	1505.44	1836.4	9.66246	663.096	0.00012	ATCACCCG	1
chr1	92656	92664	chr1_92656_92664_+	1. OR;XO;PBXO	+	1. OR;XO;PBXO	922.771	1500.04	1847.2	10.0787	1021.08	0.000159	ATAACCCG	1
chr5	33817	33825	chr5_33817_33825_+	1. OR;XO;PBXO	+	1. OR;XO;PBXO	270.377	1496.08	1645.48	11.8923	344.387	0.000223	CTCACCCG	1
chr16	457207	457215	chr16_457207_457215_+	1. OR;XO;PBXO	+	1. OR;XO;PBXO	101.173	1495	249.621	14.1815	608.719	4.14e-05	GTTACCCT	0
chr5	327155	327163	chr5_327155_327163_+	1. OR;XO;PBXO	+	1. OR;XO;PBXO	88.9628	1494.28	49.9242	188.938	376.107	0.000619	GTCACCCC	2
chr13	271773	271781	chr13_271773_271781_-	1. OR;XO;PBXO	-	1. OR;XO;PBXO	4847.6	1490.69	8795.43	118.239	2939.37	1.21e-05	GTTACCCG	0
chr12	500474	500482	chr12_500474_500482_-	1. OR;XO;PBXO	-	1. OR;XO;PBXO	263.4	1489.25	288.076	20.3655	1474.22	0.000405	GTTGCCCG	1
chr12	296363	296371	chr12_296363_296371_+	1. OR;XO;PBXO	+	1. OR;XO;PBXO	232.001	1488.89	549.166	87.2892	539.237	0.000108	GTAACCCG	1
chr8	508778	508786	chr8_508778_508786_+	1. OR;XO;PBXO	+	1. OR;XO;PBXO	270.377	1487.09	0	65.229	320.219	4.14e-05	GTTACCCT	0
chr4	255261	255269	chr4_255261_255269_+	1. OR;XO;PBXO	+	1. OR;XO;PBXO	125.595	1485.65	3233.6	121.033	663.096	0.000159	ATAACCCG	1
chr16	653890	653898	chr16_653890_653898_-	1. OR;XO;PBXO	-	1. OR;XO;PBXO	519.822	1484.93	1443.75	30.0577	655.543	0.000108	GTAACCCG	1
chr4	971587	971595	chr4_971587_971595_+	1. OR;XO;PBXO	+	1. OR;XO;PBXO	1241.99	1484.57	2097.49	148.386	592.104	2.67e-05	ATTACCCG	0
chr15	617070	617078	chr15_617070_617078_-	1. OR;XO;PBXO	-	1. OR;XO;PBXO	2707.26	1482.05	10096.2	74.6834	2931.82	4.14e-05	GTTACCCT	0
chr16	719473	719481	chr16_719473_719481_+	1. OR;XO;PBXO	+	1. OR;XO;PBXO	2721.22	1481.69	1140.16	115.86	599.656	9.59e-05	GTCACCCG	1
chr4	1525295	1525303	chr4_1525295_1525303_-	1. OR;XO;PBXO	-	1. OR;XO;PBXO	4326.04	1480.97	4277.97	32.9118	3327.56	7.13e-05	ATTACCCT	0
chr10	159727	159735	chr10_159727_159735_+	1. OR;XO;PBXO	+	1. OR;XO;PBXO	88.9628	1479.54	0	10.1381	264.332	0.000405	GTTGCCCG	1
chr16	411765	411773	chr16_411765_411773_+	1. OR;XO;PBXO	+	1. OR;XO;PBXO	378.528	1478.1	2712.1	58.2721	1081.5	0.00012	ATCACCCG	1
chr16	682608	682616	chr16_682608_682616_+	1. OR;XO;PBXO	+	1. OR;XO;PBXO	1606.56	1474.14	4474.29	83.9296	1138.89	1.21e-05	GTTACCCG	0
chr16	517140	517148	chr16_517140_517148_+	1. OR;XO;PBXO	+	1. OR;XO;PBXO	232.001	1473.42	3830	5.26232	1386.61	2.67e-05	ATTACCCG	0
chr13	777685	777693	chr13_777685_777693_-	1. OR;XO;PBXO	-	1. OR;XO;PBXO	139.55	1473.06	656.436	6.12451	531.685	8.6e-05	CTTACCCT	0
chr2	405484	405492	chr2_405484_405492_+	1. OR;XO;PBXO	+	1. OR;XO;PBXO	1166.98	1471.62	3090.58	299.952	913.834	1.21e-05	GTTACCCG	0
chr16	198580	198588	chr16_198580_198588_-	1. OR;XO;PBXO	-	1. OR;XO;PBXO	162.226	1468.74	1994.94	18.2546	433.505	0.000108	GTAACCCG	1
chr7	374953	374961	chr7_374953_374961_+	1. OR;XO;PBXO	+	1. OR;XO;PBXO	1381.54	1466.59	2380.85	220.75	1601.1	5.35e-05	CTTACCCG	0
chr4	768309	768317	chr4_768309_768317_+	1. OR;XO;PBXO	+	1. OR;XO;PBXO	371.551	1465.51	725.925	8.59216	389.701	0.000386	GGTACCCG	1
chr12	41051	41059	chr12_41051_41059_+	1. OR;XO;PBXO	+	1. OR;XO;PBXO	214.557	1462.27	4580.21	4.28121	335.324	1.21e-05	GTTACCCG	0
chr8	406903	406911	chr8_406903_406911_+	1. OR;XO;PBXO	+	1. OR;XO;PBXO	291.31	1461.91	3790.87	104.741	2022.52	2.67e-05	ATTACCCG	0
chr11	22348	22356	chr11_22348_22356_+	1. OR;XO;PBXO	+	1. OR;XO;PBXO	61.0529	1457.59	0	3.77579	335.324	0.000198	GTAACCCT	1
chr4	1198914	1198922	chr4_1198914_1198922_-	1. OR;XO;PBXO	-	1. OR;XO;PBXO	85.4741	1457.59	169.338	36.8065	1163.06	0.00012	ATCACCCG	1
chr15	883019	883027	chr15_883019_883027_+	1. OR;XO;PBXO	+	1. OR;XO;PBXO	62.7973	1452.56	70.8384	2.34872	442.567	0.000173	GTTACCCA	1
chr15	304469	304477	chr15_304469_304477_-	1. OR;XO;PBXO	-	1. OR;XO;PBXO	1894.39	1448.24	4078.27	81.5809	625.334	0.000969	ATTAACCT	1
chr7	581843	581851	chr7_581843_581851_+	1. OR;XO;PBXO	+	1. OR;XO;PBXO	702.981	1447.16	4657.12	60.7397	895.708	7.13e-05	ATTACCCT	0
chr16	205083	205091	chr16_205083_205091_-	1. OR;XO;PBXO	-	1. OR;XO;PBXO	2384.55	1446.44	1582.73	304.739	1440.99	1.21e-05	GTTACCCG	0
chr5	484659	484667	chr5_484659_484667_+	1. OR;XO;PBXO	+	1. OR;XO;PBXO	4812.72	1441.05	3265.31	240.342	1469.69	4.14e-05	GTTACCCT	0
chr16	695215	695223	chr16_695215_695223_+	1. OR;XO;PBXO	+	1. OR;XO;PBXO	4073.1	1440.33	3845.51	77.151	1844.28	1.21e-05	GTTACCCG	0
chr16	677028	677036	chr16_677028_677036_+	1. OR;XO;PBXO	+	1. OR;XO;PBXO	69.7748	1435.29	0	13.1409	377.617	0.00051	AGTACCCG	1
chr6	4958	4966	chr6_4958_4966_+	1. OR;XO;PBXO	+	1. OR;XO;PBXO	5810.49	1434.21	8207.14	18.2249	4508.75	0.000282	ATTACCCA	1
chr15	277910	277918	chr15_277910_277918_+	1. OR;XO;PBXO	+	1. OR;XO;PBXO	387.25	1434.21	1769.61	65.0506	406.316	1.21e-05	GTTACCCG	0
chr4	1259929	1259937	chr4_1259929_1259937_+	1. OR;XO;PBXO	+	1. OR;XO;PBXO	108.151	1433.85	0	1.87303	314.177	8.6e-05	CTTACCCT	0
chr13	307120	307128	chr13_307120_307128_-	1. OR;XO;PBXO	-	1. OR;XO;PBXO	223.279	1433.13	827.797	9.12731	422.931	0.000908	CTTAACCG	1
chr5	229594	229602	chr5_229594_229602_+	1. OR;XO;PBXO	+	1. OR;XO;PBXO	3708.53	1430.97	4520.84	242.275	1764.23	2.67e-05	ATTACCCG	0
chr16	900033	900041	chr16_900033_900041_-	1. OR;XO;PBXO	-	1. OR;XO;PBXO	5953.53	1423.06	3460.96	59.9072	2498.32	1.21e-05	GTTACCCG	0
chr11	278456	278464	chr11_278456_278464_-	1. OR;XO;PBXO	-	1. OR;XO;PBXO	62.7973	1421.62	0	2.31899	294.541	0.000405	GTTCCCCG	1
chr4	125281	125289	chr4_125281_125289_+	1. OR;XO;PBXO	+	1. OR;XO;PBXO	3746.91	1419.82	5074.05	46.5879	1217.44	2.67e-05	ATTACCCG	0
chr16	730364	730372	chr16_730364_730372_+	1. OR;XO;PBXO	+	1. OR;XO;PBXO	3499.21	1419.82	2322.83	266.03	879.093	1.21e-05	GTTACCCG	0
chr10	220478	220486	chr10_220478_220486_-	1. OR;XO;PBXO	-	1. OR;XO;PBXO	1418.17	1418.38	1300.05	22.0304	848.883	0.000213	TTTACCCG	1
chr14	214738	214746	chr14_214738_214746_+	1. OR;XO;PBXO	+	1. OR;XO;PBXO	720.425	1413.71	2308.66	49.9772	540.748	2.67e-05	ATTACCCG	0
chr10	450789	450797	chr10_450789_450797_+	1. OR;XO;PBXO	+	1. OR;XO;PBXO	570.409	1412.99	1849.89	25.0629	498.455	5.35e-05	CTTACCCG	0
chr12	796453	796461	chr12_796453_796461_+	1. OR;XO;PBXO	+	1. OR;XO;PBXO	64.5417	1411.55	663.857	17.2438	471.266	0.000173	GTTACCCA	1
chr7	750844	750852	chr7_750844_750852_-	1. OR;XO;PBXO	-	1. OR;XO;PBXO	204.091	1409.03	4056.01	16.0248	613.25	5.35e-05	CTTACCCG	0
chr15	374521	374529	chr15_374521_374529_-	1. OR;XO;PBXO	-	1. OR;XO;PBXO	64.5417	1407.95	0	1.99195	448.609	4.14e-05	GTTACCCT	0
chr4	234216	234224	chr4_234216_234224_-	1. OR;XO;PBXO	-	1. OR;XO;PBXO	1761.81	1407.59	7757.82	20.7817	2853.28	4.14e-05	GTTACCCT	0
chr14	110722	110730	chr14_110722_110730_-	1. OR;XO;PBXO	-	1. OR;XO;PBXO	1948.46	1406.87	6529.95	125.285	1566.36	2.67e-05	ATTACCCG	0
chr15	232319	232327	chr15_232319_232327_-	1. OR;XO;PBXO	-	1. OR;XO;PBXO	287.821	1403.99	1161.75	22.4169	1913.76	0.000237	ATTACCCC	1
chr13	560786	560794	chr13_560786_560794_-	1. OR;XO;PBXO	-	1. OR;XO;PBXO	280.843	1403.63	1376.96	102.719	522.622	2.67e-05	ATTACCCG	0
chr2	337050	337058	chr2_337050_337058_+	1. OR;XO;PBXO	+	1. OR;XO;PBXO	1753.09	1401.84	3669.43	67.9642	2312.53	0.000704	GCCACCCG	2
chr15	513	521	chr15_513_521_+	1. OR;XO;PBXO	+	1. OR;XO;PBXO	2081.03	1394.28	2382.87	40.5526	0	8.6e-05	CTTACCCT	0
chr5	298522	298530	chr5_298522_298530_-	1. OR;XO;PBXO	-	1. OR;XO;PBXO	840.786	1393.56	2077.25	95.3164	374.596	5.35e-05	CTTACCCG	0
chr4	369375	369383	chr4_369375_369383_-	1. OR;XO;PBXO	-	1. OR;XO;PBXO	1097.21	1392.84	2228.37	3.89471	714.452	2.67e-05	ATTACCCG	0
chr7	720228	720236	chr7_720228_720236_-	1. OR;XO;PBXO	-	1. OR;XO;PBXO	209.324	1390.32	1961.21	44.923	459.182	2.67e-05	ATTACCCG	0
chr16	534852	534860	chr16_534852_534860_+	1. OR;XO;PBXO	+	1. OR;XO;PBXO	261.655	1388.53	1074.05	102.898	410.847	5.35e-05	CTTACCCG	0
chr2	414365	414373	chr2_414365_414373_+	1. OR;XO;PBXO	+	1. OR;XO;PBXO	132.572	1386.73	1437.01	4.16229	453.141	4.14e-05	GTTACCCT	0
chr2	82428	82436	chr2_82428_82436_-	1. OR;XO;PBXO	-	1. OR;XO;PBXO	2110.69	1384.93	459.438	7.25428	1132.85	7.13e-05	ATTACCCT	0
chr12	489643	489651	chr12_489643_489651_+	1. OR;XO;PBXO	+	1. OR;XO;PBXO	3483.51	1383.49	5814.15	2.49737	3809.4	1.21e-05	GTTACCCG	0
chr11	285528	285536	chr11_285528_285536_-	1. OR;XO;PBXO	-	1. OR;XO;PBXO	83.7297	1382.05	750.213	3.27037	590.593	9.59e-05	GTCACCCG	1
chr4	653246	653254	chr4_653246_653254_+	1. OR;XO;PBXO	+	1. OR;XO;PBXO	1266.41	1381.69	4342.06	50.8394	1373.02	9.59e-05	GTCACCCG	1
chr3	266320	266328	chr3_266320_266328_+	1. OR;XO;PBXO	+	1. OR;XO;PBXO	3422.45	1380.25	4356.23	64.2776	1027.12	2.67e-05	ATTACCCG	0
chr4	657615	657623	chr4_657615_657623_+	1. OR;XO;PBXO	+	1. OR;XO;PBXO	1484.46	1371.98	1217.07	35.4389	1021.08	0.000756	ATGACCCT	1
chr14	525930	525938	chr14_525930_525938_-	1. OR;XO;PBXO	-	1. OR;XO;PBXO	158.738	1370.18	1510.54	84.0485	755.234	0.000457	GATACCCG	1
chr2	636780	636788	chr2_636780_636788_+	1. OR;XO;PBXO	+	1. OR;XO;PBXO	90.7072	1370.18	1242.03	10.9111	374.596	5.35e-05	CTTACCCG	0
chr15	586493	586501	chr15_586493_586501_+	1. OR;XO;PBXO	+	1. OR;XO;PBXO	160.482	1368.74	902.684	7.19482	404.806	0.00012	ATCACCCG	1
chr10	146952	146960	chr10_146952_146960_-	1. OR;XO;PBXO	-	1. OR;XO;PBXO	1850.78	1368.02	4381.86	134.145	1726.47	0.000173	GTTACCCA	1
chr13	564281	564289	chr13_564281_564289_+	1. OR;XO;PBXO	+	1. OR;XO;PBXO	2086.27	1365.5	6502.29	222.593	1536.15	2.67e-05	ATTACCCG	0
chr16	116925	116933	chr16_116925_116933_+	1. OR;XO;PBXO	+	1. OR;XO;PBXO	122.106	1365.14	15.517	23.7548	309.646	0.000223	CTCACCCG	1
chr14	720856	720864	chr14_720856_720864_-	1. OR;XO;PBXO	-	1. OR;XO;PBXO	554.709	1363.71	224.659	86.2189	460.693	5.35e-05	CTTACCCG	0
chr6	55223	55231	chr6_55223_55231_+	1. OR;XO;PBXO	+	1. OR;XO;PBXO	1222.8	1362.27	928.995	29.136	407.827	5.35e-05	CTTACCCG	0
chr12	1043170	1043178	chr12_1043170_1043178_+	1. OR;XO;PBXO	+	1. OR;XO;PBXO	90.7072	1354.35	39.1298	32.7334	444.078	0.000597	GTTGCCCT	1
chr4	949603	949611	chr4_949603_949611_+	1. OR;XO;PBXO	+	1. OR;XO;PBXO	69.7748	1353.99	1253.5	8.94892	395.743	5.35e-05	CTTACCCG	0
chr5	131530	131538	chr5_131530_131538_-	1. OR;XO;PBXO	-	1. OR;XO;PBXO	3511.42	1347.16	9686.65	172.081	2249.09	2.67e-05	ATTACCCG	0
chr13	28784	28792	chr13_28784_28792_+	1. OR;XO;PBXO	+	1. OR;XO;PBXO	99.4291	1345.36	1310.17	5.29205	428.973	1.21e-05	GTTACCCG	0
chr11	493760	493768	chr11_493760_493768_-	1. OR;XO;PBXO	-	1. OR;XO;PBXO	1053.6	1343.2	934.392	85.4756	1755.16	2.67e-05	ATTACCCG	0
chr5	6281	6289	chr5_6281_6289_+	1. OR;XO;PBXO	+	1. OR;XO;PBXO	392.483	1343.2	3691.02	15.5789	631.376	0.000237	ATTACCCC	1
chr15	860509	860517	chr15_860509_860517_-	1. OR;XO;PBXO	-	1. OR;XO;PBXO	1322.23	1341.4	1066.62	106.852	486.371	1.21e-05	GTTACCCG	0
chr13	413580	413588	chr13_413580_413588_+	1. OR;XO;PBXO	+	1. OR;XO;PBXO	254.678	1336.37	111.318	24.2899	404.806	0.00042	CTTACCCA	1
chr13	70288	70296	chr13_70288_70296_+	1. OR;XO;PBXO	+	1. OR;XO;PBXO	108.151	1330.97	387.925	8.26512	2943.9	0.000619	GTCACCCC	2
chr13	70285	70293	chr13_70285_70293_-	1. OR;XO;PBXO	-	1. OR;XO;PBXO	111.64	1328.09	399.394	8.26512	2943.9	0.000364	GTGACCCG	1
chr15	544846	544854	chr15_544846_544854_+	1. OR;XO;PBXO	+	1. OR;XO;PBXO	2879.95	1325.57	5090.92	171.903	1693.24	1.21e-05	GTTACCCG	0
chr16	858969	858977	chr16_858969_858977_+	1. OR;XO;PBXO	+	1. OR;XO;PBXO	62.7973	1318.38	0	3.00279	321.73	0.000405	GTTCCCCG	1
chr13	318543	318551	chr13_318543_318551_+	1. OR;XO;PBXO	+	1. OR;XO;PBXO	116.873	1314.06	181.481	23.1007	442.567	2.67e-05	ATTACCCG	0
chr5	260166	260174	chr5_260166_260174_-	1. OR;XO;PBXO	-	1. OR;XO;PBXO	108.151	1312.26	1548.33	28.1549	368.554	7.13e-05	ATTACCCT	0
chr11	468874	468882	chr11_468874_468882_-	1. OR;XO;PBXO	-	1. OR;XO;PBXO	1699.02	1310.11	4484.41	106.822	1724.96	1.21e-05	GTTACCCG	0
chr12	121210	121218	chr12_121210_121218_-	1. OR;XO;PBXO	-	1. OR;XO;PBXO	1385.03	1309.39	2623.05	339.137	744.661	2.67e-05	ATTACCCG	0
chr4	215863	215871	chr4_215863_215871_+	1. OR;XO;PBXO	+	1. OR;XO;PBXO	2040.91	1305.79	1775.01	65.8236	2283.83	2.67e-05	ATTACCCG	0
chr14	662525	662533	chr14_662525_662533_+	1. OR;XO;PBXO	+	1. OR;XO;PBXO	6939.1	1305.43	4703.67	62.9398	4131.13	1.21e-05	GTTACCCG	0
chr13	382992	383000	chr13_382992_383000_-	1. OR;XO;PBXO	-	1. OR;XO;PBXO	151.76	1301.47	493.17	66.9831	1292.96	0.000183	GCTACCCG	1
chr10	146955	146963	chr10_146955_146963_+	1. OR;XO;PBXO	+	1. OR;XO;PBXO	1842.05	1299.67	3993.94	134.145	1718.91	0.000108	GTAACCCG	1
chr5	439296	439304	chr5_439296_439304_+	1. OR;XO;PBXO	+	1. OR;XO;PBXO	375.039	1298.6	3352.34	44.3878	435.015	4.14e-05	GTTACCCT	0
chr12	559328	559336	chr12_559328_559336_+	1. OR;XO;PBXO	+	1. OR;XO;PBXO	258.167	1295.36	3189.75	82.6215	262.822	0.000937	ATCACCCA	2
chr3	289396	289404	chr3_289396_289404_+	1. OR;XO;PBXO	+	1. OR;XO;PBXO	1166.98	1294.64	2805.88	325.759	1149.47	2.67e-05	ATTACCCG	0
chr6	4984	4992	chr6_4984_4992_+	1. OR;XO;PBXO	+	1. OR;XO;PBXO	5695.37	1294.28	9143.55	18.2249	4587.29	8.6e-05	CTTACCCT	0
chr4	539669	539677	chr4_539669_539677_-	1. OR;XO;PBXO	-	1. OR;XO;PBXO	1313.51	1289.24	3167.49	186.5	1339.79	2.67e-05	ATTACCCG	0
chr4	461521	461529	chr4_461521_461529_+	1. OR;XO;PBXO	+	1. OR;XO;PBXO	368.062	1287.08	435.825	12.0112	345.897	0.000223	CTCACCCG	1
chr14	37536	37544	chr14_37536_37544_+	1. OR;XO;PBXO	+	1. OR;XO;PBXO	390.739	1285.65	783.945	61.364	835.289	2.67e-05	ATTACCCG	0
chr4	451590	451598	chr4_451590_451598_-	1. OR;XO;PBXO	-	1. OR;XO;PBXO	76.7523	1284.21	106.595	3.95418	456.162	4.14e-05	GTTACCCT	0
chr4	148061	148069	chr4_148061_148069_-	1. OR;XO;PBXO	-	1. OR;XO;PBXO	2979.38	1282.77	5253.51	258.746	1555.78	0.000198	GTAACCCT	1
chr4	148064	148072	chr4_148064_148072_+	1. OR;XO;PBXO	+	1. OR;XO;PBXO	2937.52	1282.41	4660.49	258.746	1554.27	4.14e-05	GTTACCCT	0
chr2	101314	101322	chr2_101314_101322_-	1. OR;XO;PBXO	-	1. OR;XO;PBXO	66.286	1281.69	0	3.47849	507.517	0.000405	GTTCCCCG	1
chr15	554904	554912	chr15_554904_554912_+	1. OR;XO;PBXO	+	1. OR;XO;PBXO	1515.86	1281.69	5509.2	32.1983	1277.86	4.14e-05	GTTACCCT	0
chr4	323800	323808	chr4_323800_323808_+	1. OR;XO;PBXO	+	1. OR;XO;PBXO	682.048	1279.89	174.06	24.5575	300.583	0.000223	CTCACCCG	1
chr15	605901	605909	chr15_605901_605909_+	1. OR;XO;PBXO	+	1. OR;XO;PBXO	170.948	1276.65	1841.8	2.40818	672.159	4.14e-05	GTTACCCT	0
chr8	272525	272533	chr8_272525_272533_-	1. OR;XO;PBXO	-	1. OR;XO;PBXO	645.417	1273.06	1056.5	100.698	428.973	4.14e-05	GTTACCCT	0
chr5	266179	266187	chr5_266179_266187_-	1. OR;XO;PBXO	-	1. OR;XO;PBXO	307.009	1270.18	990.389	46.5285	2140.33	0.000108	GTAACCCG	1
chr1	6430	6438	chr1_6430_6438_+	1. OR;XO;PBXO	+	1. OR;XO;PBXO	97.6847	1268.02	893.239	22.2683	438.036	0.000159	ATAACCCG	1
chr12	636271	636279	chr12_636271_636279_+	1. OR;XO;PBXO	+	1. OR;XO;PBXO	331.43	1264.42	922.923	17.5411	371.575	4.14e-05	GTTACCCT	0
chr14	332297	332305	chr14_332297_332305_-	1. OR;XO;PBXO	-	1. OR;XO;PBXO	4333.01	1263.34	7139.84	118.12	1055.82	1.21e-05	GTTACCCG	0
chr13	366869	366877	chr13_366869_366877_-	1. OR;XO;PBXO	-	1. OR;XO;PBXO	1644.94	1262.62	627.426	456.544	1016.55	2.67e-05	ATTACCCG	0
chr4	657643	657651	chr4_657643_657651_-	1. OR;XO;PBXO	-	1. OR;XO;PBXO	1336.19	1260.82	980.943	35.4389	498.455	0.000198	GTAACCCT	1
chr14	242883	242891	chr14_242883_242891_-	1. OR;XO;PBXO	-	1. OR;XO;PBXO	76.7523	1259.39	278.631	6.36236	502.986	2.67e-05	ATTACCCG	0
chr2	340868	340876	chr2_340868_340876_-	1. OR;XO;PBXO	-	1. OR;XO;PBXO	1386.77	1255.43	2453.71	177.105	590.593	0.000213	TTTACCCG	1
chr4	1411974	1411982	chr4_1411974_1411982_+	1. OR;XO;PBXO	+	1. OR;XO;PBXO	601.807	1255.43	2008.44	138.396	525.643	4.14e-05	GTTACCCT	0
chr1	119767	119775	chr1_119767_119775_-	1. OR;XO;PBXO	-	1. OR;XO;PBXO	627.973	1252.91	442.571	128.317	560.384	2.67e-05	ATTACCCG	0
chr14	783803	783811	chr14_783803_783811_-	1. OR;XO;PBXO	-	1. OR;XO;PBXO	3204.41	1251.83	3054.15	1.90276	1814.07	7.13e-05	ATTACCCT	0
chr10	220781	220789	chr10_220781_220789_+	1. OR;XO;PBXO	+	1. OR;XO;PBXO	165.715	1249.31	1876.88	30.8604	933.47	2.67e-05	ATTACCCG	0
chr7	500011	500019	chr7_500011_500019_+	1. OR;XO;PBXO	+	1. OR;XO;PBXO	692.515	1242.84	6401.09	87.1108	1576.93	0.000183	GCTACCCG	1
chr5	503890	503898	chr5_503890_503898_+	1. OR;XO;PBXO	+	1. OR;XO;PBXO	132.572	1242.48	1681.23	44.1203	1469.69	0.000173	GTTACCCA	1
chr7	756625	756633	chr7_756625_756633_+	1. OR;XO;PBXO	+	1. OR;XO;PBXO	934.982	1240.32	3725.43	108.784	892.687	1.21e-05	GTTACCCG	0
chr12	448653	448661	chr12_448653_448661_+	1. OR;XO;PBXO	+	1. OR;XO;PBXO	263.4	1237.8	640.919	4.28121	1163.06	0.00043	CCTACCCG	1
chr4	1008832	1008840	chr4_1008832_1008840_+	1. OR;XO;PBXO	+	1. OR;XO;PBXO	350.618	1235.28	535.673	132.331	318.709	2.67e-05	ATTACCCG	0
chr7	444076	444084	chr7_444076_444084_+	1. OR;XO;PBXO	+	1. OR;XO;PBXO	61.0529	1227.01	767.079	2.82441	409.337	0.000198	GTAACCCT	1
chr8	272063	272071	chr8_272063_272071_-	1. OR;XO;PBXO	-	1. OR;XO;PBXO	85.4741	1226.65	1345.26	4.90556	576.999	0.000364	GTGACCCG	1
chr4	579862	579870	chr4_579862_579870_+	1. OR;XO;PBXO	+	1. OR;XO;PBXO	144.783	1221.26	407.49	3.56768	320.219	0.00012	ATCACCCG	1
chr16	637244	637252	chr16_637244_637252_-	1. OR;XO;PBXO	-	1. OR;XO;PBXO	76.7523	1216.94	175.409	9.39488	317.198	7.13e-05	ATTACCCT	0
chr12	545887	545895	chr12_545887_545895_+	1. OR;XO;PBXO	+	1. OR;XO;PBXO	132.572	1216.58	68.1398	32.3469	395.743	0.00012	ATCACCCG	1
chr8	39922	39930	chr8_39922_39930_+	1. OR;XO;PBXO	+	1. OR;XO;PBXO	1685.06	1216.22	3820.55	250.956	1605.63	1.21e-05	GTTACCCG	0
chr4	924040	924048	chr4_924040_924048_-	1. OR;XO;PBXO	-	1. OR;XO;PBXO	708.214	1212.62	1916.01	90.9758	351.939	0.000213	TTTACCCG	1
chr14	652001	652009	chr14_652001_652009_-	1. OR;XO;PBXO	-	1. OR;XO;PBXO	1494.92	1211.9	1422.17	16.4113	4259.52	7.13e-05	ATTACCCT	0
chr10	225221	225229	chr10_225221_225229_+	1. OR;XO;PBXO	+	1. OR;XO;PBXO	66.286	1211.18	0	3.50822	357.981	7.13e-05	ATTACCCT	0
chr16	465731	465739	chr16_465731_465739_-	1. OR;XO;PBXO	-	1. OR;XO;PBXO	195.369	1211.18	1086.86	152.697	542.258	4.14e-05	GTTACCCT	0
chr10	683628	683636	chr10_683628_683636_+	1. OR;XO;PBXO	+	1. OR;XO;PBXO	779.733	1205.79	621.354	56.4585	1457.6	2.67e-05	ATTACCCG	0
chr15	445992	446000	chr15_445992_446000_+	1. OR;XO;PBXO	+	1. OR;XO;PBXO	123.85	1203.63	147.074	4.40014	345.897	0.000498	ATGACCCG	1
chr14	405808	405816	chr14_405808_405816_+	1. OR;XO;PBXO	+	1. OR;XO;PBXO	3902.15	1203.63	2332.27	23.7251	4374.32	7.13e-05	ATTACCCT	0
chr16	641482	641490	chr16_641482_641490_+	1. OR;XO;PBXO	+	1. OR;XO;PBXO	2030.45	1199.31	1493.68	7.43266	4659.8	0.00051	AGTACCCG	1
chr3	147218	147226	chr3_147218_147226_-	1. OR;XO;PBXO	-	1. OR;XO;PBXO	137.805	1198.59	885.143	5.70828	481.84	2.67e-05	ATTACCCG	0
chr7	853586	853594	chr7_853586_853594_+	1. OR;XO;PBXO	+	1. OR;XO;PBXO	279.099	1198.59	995.786	76.9429	525.643	0.000108	GTAACCCG	1
chr14	459594	459602	chr14_459594_459602_-	1. OR;XO;PBXO	-	1. OR;XO;PBXO	483.19	1197.15	1932.88	61.5722	397.253	7.13e-05	ATTACCCT	0
chr15	61220	61228	chr15_61220_61228_-	1. OR;XO;PBXO	-	1. OR;XO;PBXO	493.657	1192.84	6801.16	138.069	712.941	7.13e-05	ATTACCCT	0
chr15	553013	553021	chr15_553013_553021_-	1. OR;XO;PBXO	-	1. OR;XO;PBXO	1203.61	1191.4	2759.32	44.5365	1484.79	2.67e-05	ATTACCCG	0
chr7	771965	771973	chr7_771965_771973_-	1. OR;XO;PBXO	-	1. OR;XO;PBXO	75.0079	1191.4	416.26	2.82441	373.086	7.13e-05	ATTACCCT	0
chr5	101646	101654	chr5_101646_101654_-	1. OR;XO;PBXO	-	1. OR;XO;PBXO	980.336	1188.16	855.458	235.615	2356.33	2.67e-05	ATTACCCG	0
chr4	196259	196267	chr4_196259_196267_-	1. OR;XO;PBXO	-	1. OR;XO;PBXO	75.0079	1187.8	692.867	5.35152	442.567	0.000173	GTTACCCA	1
chr15	234602	234610	chr15_234602_234610_+	1. OR;XO;PBXO	+	1. OR;XO;PBXO	1974.63	1187.8	1109.13	108.517	685.753	7.13e-05	ATTACCCT	0
chr12	840142	840150	chr12_840142_840150_-	1. OR;XO;PBXO	-	1. OR;XO;PBXO	605.296	1181.69	4956.67	81.5214	450.12	5.35e-05	CTTACCCG	0
chr5	546658	546666	chr5_546658_546666_-	1. OR;XO;PBXO	-	1. OR;XO;PBXO	2119.41	1180.61	940.464	53.4557	480.329	0.000213	TTTACCCG	1
chr10	83316	83324	chr10_83316_83324_+	1. OR;XO;PBXO	+	1. OR;XO;PBXO	273.866	1180.25	104.571	29.1658	435.015	0.000213	TTTACCCG	1
chr13	795653	795661	chr13_795653_795661_-	1. OR;XO;PBXO	-	1. OR;XO;PBXO	123.85	1174.13	0	33.8335	395.743	0.000183	GCTACCCG	1
chr2	775006	775014	chr2_775006_775014_+	1. OR;XO;PBXO	+	1. OR;XO;PBXO	71.5191	1169.82	370.384	7.84889	617.782	0.000159	GTCACCCT	1
chr4	1174915	1174923	chr4_1174915_1174923_-	1. OR;XO;PBXO	-	1. OR;XO;PBXO	458.769	1161.9	1283.19	121.182	459.182	7.13e-05	ATTACCCT	0
chr15	86910	86918	chr15_86910_86918_-	1. OR;XO;PBXO	-	1. OR;XO;PBXO	432.604	1158.3	1756.79	116.395	453.141	2.67e-05	ATTACCCG	0
chr14	281685	281693	chr14_281685_281693_-	1. OR;XO;PBXO	-	1. OR;XO;PBXO	1847.29	1155.07	2879.41	98.5273	1321.66	2.67e-05	ATTACCCG	0
chr6	149875	149883	chr6_149875_149883_-	1. OR;XO;PBXO	-	1. OR;XO;PBXO	680.304	1152.91	1725.76	66.2101	1876	2.67e-05	ATTACCCG	0
chr4	744123	744131	chr4_744123_744131_+	1. OR;XO;PBXO	+	1. OR;XO;PBXO	458.769	1152.55	26.9861	298.139	397.253	0.000213	TTTACCCG	1
chr9	265430	265438	chr9_265430_265438_+	1. OR;XO;PBXO	+	1. OR;XO;PBXO	71.5191	1148.23	837.917	2.88387	379.128	0.000198	GTAACCCT	1
chr2	276630	276638	chr2_276630_276638_+	1. OR;XO;PBXO	+	1. OR;XO;PBXO	301.776	1146.79	2243.89	56.6666	354.96	2.67e-05	ATTACCCG	0
chr4	1056011	1056019	chr4_1056011_1056019_-	1. OR;XO;PBXO	-	1. OR;XO;PBXO	108.151	1145.35	0	7.07589	392.722	0.000457	GATACCCG	1
chr3	24449	24457	chr3_24449_24457_+	1. OR;XO;PBXO	+	1. OR;XO;PBXO	327.941	1135.64	640.244	63.5047	684.242	0.000704	GCCACCCG	2
chr3	24440	24448	chr3_24440_24448_-	1. OR;XO;PBXO	-	1. OR;XO;PBXO	315.731	1135.64	640.244	63.5047	684.242	0.000249	CTAACCCG	1
chr5	178679	178687	chr5_178679_178687_+	1. OR;XO;PBXO	+	1. OR;XO;PBXO	2707.26	1134.2	4676.01	266.951	2499.83	1.21e-05	GTTACCCG	0
chr13	173364	173372	chr13_173364_173372_-	1. OR;XO;PBXO	-	1. OR;XO;PBXO	64.5417	1133.12	20.2395	5.70828	477.308	0.00012	ATCACCCG	1
chr2	116971	116979	chr2_116971_116979_+	1. OR;XO;PBXO	+	1. OR;XO;PBXO	880.907	1131.68	1708.22	30.9793	862.478	0.000108	GTAACCCG	1
chr14	241458	241466	chr14_241458_241466_+	1. OR;XO;PBXO	+	1. OR;XO;PBXO	200.602	1130.25	265.813	19.1763	445.588	0.000183	GCTACCCG	1
chr4	1194964	1194972	chr4_1194964_1194972_-	1. OR;XO;PBXO	-	1. OR;XO;PBXO	559.943	1130.25	417.609	21.4953	447.099	2.67e-05	ATTACCCG	0
chr3	236969	236977	chr3_236969_236977_+	1. OR;XO;PBXO	+	1. OR;XO;PBXO	2074.06	1130.25	5392.49	150.259	1076.96	1.21e-05	GTTACCCG	0
chr15	514791	514799	chr15_514791_514799_+	1. OR;XO;PBXO	+	1. OR;XO;PBXO	1121.63	1129.53	6469.91	57.4099	2576.86	2.67e-05	ATTACCCG	0
chr12	566440	566448	chr12_566440_566448_-	1. OR;XO;PBXO	-	1. OR;XO;PBXO	1294.32	1128.09	3977.07	352.13	1120.77	4.14e-05	GTTACCCT	0
chr4	714650	714658	chr4_714650_714658_+	1. OR;XO;PBXO	+	1. OR;XO;PBXO	75.0079	1127.73	890.54	3.50822	388.19	8.6e-05	CTTACCCT	0
chr11	559508	559516	chr11_559508_559516_-	1. OR;XO;PBXO	-	1. OR;XO;PBXO	244.212	1122.69	547.142	33.328	418.4	5.35e-05	CTTACCCG	0
chr3	168304	168312	chr3_168304_168312_+	1. OR;XO;PBXO	+	1. OR;XO;PBXO	214.557	1118.73	665.206	6.62993	567.936	0.00043	CCTACCCG	1
chr7	321617	321625	chr7_321617_321625_+	1. OR;XO;PBXO	+	1. OR;XO;PBXO	327.941	1118.02	1638.05	44.923	913.834	2.67e-05	ATTACCCG	0
chr4	38356	38364	chr4_38356_38364_-	1. OR;XO;PBXO	-	1. OR;XO;PBXO	1109.42	1114.06	2302.59	336.759	700.857	2.67e-05	ATTACCCG	0
chr12	11416	11424	chr12_11416_11424_+	1. OR;XO;PBXO	+	1. OR;XO;PBXO	4291.15	1111.54	1634.01	20.6331	1376.04	7.13e-05	ATTACCCT	0
chr2	151349	151357	chr2_151349_151357_+	1. OR;XO;PBXO	+	1. OR;XO;PBXO	2061.84	1107.58	2473.95	484.312	930.449	2.67e-05	ATTACCCG	0
chr14	148084	148092	chr14_148084_148092_-	1. OR;XO;PBXO	-	1. OR;XO;PBXO	1433.87	1107.58	2362.63	327.542	2551.18	4.14e-05	GTTACCCT	0
chr12	566413	566421	chr12_566413_566421_+	1. OR;XO;PBXO	+	1. OR;XO;PBXO	1323.98	1106.86	7031.89	352.13	1086.03	1.21e-05	GTTACCCG	0
chr14	270080	270088	chr14_270080_270088_-	1. OR;XO;PBXO	-	1. OR;XO;PBXO	1798.44	1106.5	733.346	46.142	2641.81	1.21e-05	GTTACCCG	0
chr4	501675	501683	chr4_501675_501683_-	1. OR;XO;PBXO	-	1. OR;XO;PBXO	2975.89	1104.71	4127.52	412.453	797.527	2.67e-05	ATTACCCG	0
chr4	787500	787508	chr4_787500_787508_-	1. OR;XO;PBXO	-	1. OR;XO;PBXO	465.747	1103.63	3691.02	31.6929	510.538	2.67e-05	ATTACCCG	0
chr2	164995	165003	chr2_164995_165003_+	1. OR;XO;PBXO	+	1. OR;XO;PBXO	483.19	1102.19	3931.19	55.0017	516.58	1.21e-05	GTTACCCG	0
chr7	36814	36822	chr7_36814_36822_+	1. OR;XO;PBXO	+	1. OR;XO;PBXO	2388.04	1101.83	1698.77	278.368	651.012	2.67e-05	ATTACCCG	0
chr15	285578	285586	chr15_285578_285586_+	1. OR;XO;PBXO	+	1. OR;XO;PBXO	2013	1099.31	6124.49	49.1447	1113.22	2.67e-05	ATTACCCG	0
chr4	1059461	1059469	chr4_1059461_1059469_+	1. OR;XO;PBXO	+	1. OR;XO;PBXO	947.193	1097.87	3349.65	158.464	462.203	1.21e-05	GTTACCCG	0
chr15	173204	173212	chr15_173204_173212_+	1. OR;XO;PBXO	+	1. OR;XO;PBXO	221.535	1095.35	1.3493	5.11367	525.643	8.6e-05	CTTACCCT	0
chr14	373443	373451	chr14_373443_373451_-	1. OR;XO;PBXO	-	1. OR;XO;PBXO	61.0529	1094.27	309.665	9.9895	391.211	0.000198	GTAACCCT	1
chr3	147783	147791	chr3_147783_147791_+	1. OR;XO;PBXO	+	1. OR;XO;PBXO	169.204	1093.19	1397.88	30.0874	413.868	5.35e-05	CTTACCCG	0
chr11	442893	442901	chr11_442893_442901_-	1. OR;XO;PBXO	-	1. OR;XO;PBXO	251.189	1092.47	864.229	70.8481	1474.22	0.000686	GTCACCCA	2
chr11	442896	442904	chr11_442896_442904_+	1. OR;XO;PBXO	+	1. OR;XO;PBXO	251.189	1091.04	864.229	70.8481	1474.22	0.000364	GTGACCCG	1
chr10	445759	445767	chr10_445759_445767_-	1. OR;XO;PBXO	-	1. OR;XO;PBXO	90.7072	1090.68	49.2496	32.1983	341.366	0.000457	GATACCCG	1
chr4	125297	125305	chr4_125297_125305_-	1. OR;XO;PBXO	-	1. OR;XO;PBXO	3949.25	1090.68	4598.43	46.5879	1203.84	7.13e-05	ATTACCCT	0
chr8	373487	373495	chr8_373487_373495_-	1. OR;XO;PBXO	-	1. OR;XO;PBXO	214.557	1089.6	351.493	19.1168	990.867	8.6e-05	CTTACCCT	0
chr7	441463	441471	chr7_441463_441471_-	1. OR;XO;PBXO	-	1. OR;XO;PBXO	94.1959	1089.6	35.7565	1.93249	406.316	0.000173	GTTACCCA	1
chr15	220285	220293	chr15_220285_220293_-	1. OR;XO;PBXO	-	1. OR;XO;PBXO	134.316	1089.24	507.338	5.41098	456.162	4.14e-05	GTTACCCT	0
chr4	437885	437893	chr4_437885_437893_-	1. OR;XO;PBXO	-	1. OR;XO;PBXO	2757.85	1087.08	2416.6	68.0534	2199.24	1.21e-05	GTTACCCG	0
chr4	892555	892563	chr4_892555_892563_+	1. OR;XO;PBXO	+	1. OR;XO;PBXO	223.279	1086	213.19	44.6852	350.429	0.000173	GTTACCCA	1
chr16	583616	583624	chr16_583616_583624_-	1. OR;XO;PBXO	-	1. OR;XO;PBXO	85.4741	1084.56	979.594	4.34067	418.4	5.35e-05	CTTACCCG	0
chr16	455107	455115	chr16_455107_455115_-	1. OR;XO;PBXO	-	1. OR;XO;PBXO	1163.49	1083.84	2223.65	7.10562	418.4	7.13e-05	ATTACCCT	0
chr16	832993	833001	chr16_832993_833001_+	1. OR;XO;PBXO	+	1. OR;XO;PBXO	64.5417	1082.4	18.8902	12.6653	484.86	9.59e-05	GTCACCCG	1
chr7	347055	347063	chr7_347055_347063_+	1. OR;XO;PBXO	+	1. OR;XO;PBXO	399.461	1082.4	2635.19	111.639	430.484	4.14e-05	GTTACCCT	0
chr7	417347	417355	chr7_417347_417355_+	1. OR;XO;PBXO	+	1. OR;XO;PBXO	1208.85	1082.04	1007.93	336.402	1842.77	5.35e-05	CTTACCCG	0
chr6	4995	5003	chr6_4995_5003_+	1. OR;XO;PBXO	+	1. OR;XO;PBXO	5438.94	1079.53	8093.12	18.2249	4606.93	7.13e-05	ATTACCCT	0
chr4	238827	238835	chr4_238827_238835_-	1. OR;XO;PBXO	-	1. OR;XO;PBXO	127.339	1077.37	20.2395	10.1084	412.358	0.000294	ACTACCCG	1
chr15	716967	716975	chr15_716967_716975_-	1. OR;XO;PBXO	-	1. OR;XO;PBXO	655.883	1075.21	4937.1	403.712	2522.48	2.67e-05	ATTACCCG	0
chr7	116	124	chr7_116_124_+	1. OR;XO;PBXO	+	1. OR;XO;PBXO	2782.27	1066.93	3392.82	2.05141	0	4.14e-05	GTTACCCT	0
chr2	158570	158578	chr2_158570_158578_-	1. OR;XO;PBXO	-	1. OR;XO;PBXO	259.911	1066.22	371.733	272.422	448.609	0.000132	GTTACCCC	1
chr7	397905	397913	chr7_397905_397913_-	1. OR;XO;PBXO	-	1. OR;XO;PBXO	1027.43	1065.5	1442.41	7.70024	959.148	0.000159	ATAACCCG	1
chr16	456143	456151	chr16_456143_456151_-	1. OR;XO;PBXO	-	1. OR;XO;PBXO	78.4966	1064.42	3409.01	17.1248	462.203	4.14e-05	GTTACCCT	0
chr3	51285	51293	chr3_51285_51293_-	1. OR;XO;PBXO	-	1. OR;XO;PBXO	607.041	1064.06	806.883	25.1819	1336.76	0.000354	TTTACCCT	1
chr8	4958	4966	chr8_4958_4966_+	1. OR;XO;PBXO	+	1. OR;XO;PBXO	226.768	1061.54	3652.56	10.8814	524.133	0.000237	ATTACCCC	1
chr11	155430	155438	chr11_155430_155438_+	1. OR;XO;PBXO	+	1. OR;XO;PBXO	144.783	1061.18	1057.85	12.4571	496.944	4.14e-05	GTTACCCT	0
chr4	407509	407517	chr4_407509_407517_+	1. OR;XO;PBXO	+	1. OR;XO;PBXO	436.092	1058.3	2995.45	32.3469	450.12	2.67e-05	ATTACCCG	0
chr16	825602	825610	chr16_825602_825610_+	1. OR;XO;PBXO	+	1. OR;XO;PBXO	88.9628	1056.86	2516.45	18.1357	626.845	7.13e-05	ATTACCCT	0
chr15	781639	781647	chr15_781639_781647_-	1. OR;XO;PBXO	-	1. OR;XO;PBXO	1941.48	1052.55	4642.95	132.628	1140.4	4.14e-05	GTTACCCT	0
chr7	892343	892351	chr7_892343_892351_+	1. OR;XO;PBXO	+	1. OR;XO;PBXO	382.017	1050.03	528.252	194.379	641.949	0.000183	GCTACCCG	1
chr13	170504	170512	chr13_170504_170512_+	1. OR;XO;PBXO	+	1. OR;XO;PBXO	83.7297	1045.71	0	2.46764	324.751	0.000237	ATTACCCC	1
chr10	669900	669908	chr10_669900_669908_+	1. OR;XO;PBXO	+	1. OR;XO;PBXO	61.0529	1044.63	859.506	2.05141	454.651	7.13e-05	ATTACCCT	0
chr14	452140	452148	chr14_452140_452148_+	1. OR;XO;PBXO	+	1. OR;XO;PBXO	5370.91	1043.19	3072.36	263.978	2906.14	1.21e-05	GTTACCCG	0
chr11	71047	71055	chr11_71047_71055_-	1. OR;XO;PBXO	-	1. OR;XO;PBXO	115.128	1040.32	1560.47	13.0518	575.489	0.000386	GGTACCCG	1
chr3	426	434	chr3_426_434_+	1. OR;XO;PBXO	+	1. OR;XO;PBXO	3446.87	1039.6	2232.42	29.909	0	7.13e-05	ATTACCCT	0
chr4	998518	998526	chr4_998518_998526_+	1. OR;XO;PBXO	+	1. OR;XO;PBXO	118.617	1037.44	0	44.2095	445.588	0.00012	ATCACCCG	1
chr4	1394910	1394918	chr4_1394910_1394918_+	1. OR;XO;PBXO	+	1. OR;XO;PBXO	2789.25	1037.08	2585.26	82.8593	1403.23	5.35e-05	CTTACCCG	0
chr14	538053	538061	chr14_538053_538061_-	1. OR;XO;PBXO	-	1. OR;XO;PBXO	490.168	1033.84	3324.68	114.671	554.342	5.35e-05	CTTACCCG	0
chr15	232346	232354	chr15_232346_232354_-	1. OR;XO;PBXO	-	1. OR;XO;PBXO	270.377	1033.84	1161.75	22.4169	1921.32	0.000864	TTAACCCG	2
chr14	19453	19461	chr14_19453_19461_-	1. OR;XO;PBXO	-	1. OR;XO;PBXO	2693.31	1030.96	964.752	301.38	2172.05	8.6e-05	CTTACCCT	0
chr7	282572	282580	chr7_282572_282580_-	1. OR;XO;PBXO	-	1. OR;XO;PBXO	64.5417	1024.85	0	2.17034	431.994	0.000173	GTTACCCA	1
chr12	121204	121212	chr12_121204_121212_+	1. OR;XO;PBXO	+	1. OR;XO;PBXO	1383.28	1023.77	2467.2	339.137	747.682	0.000108	GTAACCCG	1
chr9	77824	77832	chr9_77824_77832_+	1. OR;XO;PBXO	+	1. OR;XO;PBXO	90.7072	1022.33	907.406	31.3064	386.68	0.000173	GTTACCCA	1
chr11	374304	374312	chr11_374304_374312_+	1. OR;XO;PBXO	+	1. OR;XO;PBXO	61.0529	1022.33	1590.83	91.4812	391.211	4.14e-05	GTTACCCT	0
chr13	478856	478864	chr13_478856_478864_+	1. OR;XO;PBXO	+	1. OR;XO;PBXO	188.392	1022.33	6556.26	54.08	693.305	4.14e-05	GTTACCCT	0
chr7	857827	857835	chr7_857827_857835_+	1. OR;XO;PBXO	+	1. OR;XO;PBXO	319.22	1020.17	4498.58	13.0518	442.567	2.67e-05	ATTACCCG	0
chr13	302889	302897	chr13_302889_302897_+	1. OR;XO;PBXO	+	1. OR;XO;PBXO	2967.17	1019.81	2177.78	43.3473	2338.21	2.67e-05	ATTACCCG	0
chr4	492545	492553	chr4_492545_492553_+	1. OR;XO;PBXO	+	1. OR;XO;PBXO	85.4741	1016.57	26.3114	1.96222	385.17	0.000198	GTAACCCT	1
chr12	636260	636268	chr12_636260_636268_+	1. OR;XO;PBXO	+	1. OR;XO;PBXO	336.663	1011.18	1028.84	17.5411	383.659	0.000213	TTTACCCG	1
chr2	568417	568425	chr2_568417_568425_+	1. OR;XO;PBXO	+	1. OR;XO;PBXO	116.873	1004.7	429.753	2.94333	438.036	0.000173	GTTACCCA	1
chr14	91641	91649	chr14_91641_91649_+	1. OR;XO;PBXO	+	1. OR;XO;PBXO	125.595	1004.7	709.733	34.7849	356.471	0.00012	ATCACCCG	1
chr10	593398	593406	chr10_593398_593406_-	1. OR;XO;PBXO	-	1. OR;XO;PBXO	85.4741	996.789	19.5649	2.49737	374.596	9.59e-05	GTCACCCG	1
chr9	382359	382367	chr9_382359_382367_-	1. OR;XO;PBXO	-	1. OR;XO;PBXO	354.107	996.07	688.819	15.1329	761.276	7.13e-05	ATTACCCT	0
chr5	472616	472624	chr5_472616_472624_+	1. OR;XO;PBXO	+	1. OR;XO;PBXO	76.7523	995.35	369.034	65.3182	383.659	7.13e-05	ATTACCCT	0
chr12	460806	460814	chr12_460806_460814_+	1. OR;XO;PBXO	+	1. OR;XO;PBXO	856.485	994.99	2356.56	7705.74	6842.42	0.000213	TTTACCCG	1
chr12	197626	197634	chr12_197626_197634_-	1. OR;XO;PBXO	-	1. OR;XO;PBXO	272.122	991.753	140.328	4.63798	412.358	8.6e-05	CTTACCCT	0
chr7	96	104	chr7_96_104_+	1. OR;XO;PBXO	+	1. OR;XO;PBXO	2954.96	991.393	3377.98	2.05141	0	7.13e-05	ATTACCCT	0
chr6	251948	251956	chr6_251948_251956_-	1. OR;XO;PBXO	-	1. OR;XO;PBXO	1562.96	986.357	4765.74	70.0157	1170.61	2.67e-05	ATTACCCG	0
chr4	626207	626215	chr4_626207_626215_+	1. OR;XO;PBXO	+	1. OR;XO;PBXO	434.348	985.278	2614.95	42.3662	409.337	2.67e-05	ATTACCCG	0
chr2	242695	242703	chr2_242695_242703_-	1. OR;XO;PBXO	-	1. OR;XO;PBXO	167.459	983.839	1470.07	70.1346	968.21	4.14e-05	GTTACCCT	0
chr2	242703	242711	chr2_242703_242711_-	1. OR;XO;PBXO	-	1. OR;XO;PBXO	169.204	979.882	1509.87	70.1346	931.959	0.000445	CTAACCCT	1
chr7	494373	494381	chr7_494373_494381_-	1. OR;XO;PBXO	-	1. OR;XO;PBXO	167.459	979.882	568.057	12.8734	492.413	5.35e-05	CTTACCCG	0
chr12	514473	514481	chr12_514473_514481_-	1. OR;XO;PBXO	-	1. OR;XO;PBXO	163.971	979.522	105.92	14.2707	333.814	0.000662	CTGACCCG	1
chr4	332660	332668	chr4_332660_332668_+	1. OR;XO;PBXO	+	1. OR;XO;PBXO	347.13	979.522	5235.3	68.9454	827.737	2.67e-05	ATTACCCG	0
chr11	626420	626428	chr11_626420_626428_-	1. OR;XO;PBXO	-	1. OR;XO;PBXO	334.919	970.529	1211.67	39.4823	512.049	0.000173	GTTACCCA	1
chr4	645080	645088	chr4_645080_645088_+	1. OR;XO;PBXO	+	1. OR;XO;PBXO	109.895	967.292	0	4.63798	2158.46	0.000498	ATGACCCG	1
chr9	77821	77829	chr9_77821_77829_-	1. OR;XO;PBXO	-	1. OR;XO;PBXO	94.1959	964.414	1392.48	31.3064	386.68	0.000198	GTAACCCT	1
chr4	636201	636209	chr4_636201_636209_+	1. OR;XO;PBXO	+	1. OR;XO;PBXO	191.881	962.975	3176.93	2.79468	480.329	0.00012	ATCACCCG	1
chr7	1084288	1084296	chr7_1084288_1084296_-	1. OR;XO;PBXO	-	1. OR;XO;PBXO	3042.18	961.536	6552.22	46.5582	3863.78	4.14e-05	GTTACCCT	0
chr2	378048	378056	chr2_378048_378056_+	1. OR;XO;PBXO	+	1. OR;XO;PBXO	237.234	960.817	118.739	10.7922	445.588	0.000249	CTAACCCG	1
chr4	145649	145657	chr4_145649_145657_+	1. OR;XO;PBXO	+	1. OR;XO;PBXO	369.806	960.457	1571.94	239.807	847.373	0.000294	ACTACCCG	1
chr5	570134	570142	chr5_570134_570142_-	1. OR;XO;PBXO	-	1. OR;XO;PBXO	2126.39	957.22	3846.19	44.6257	1377.55	8.6e-05	CTTACCCT	0
chr5	570123	570131	chr5_570123_570131_-	1. OR;XO;PBXO	-	1. OR;XO;PBXO	2063.59	955.421	3104.75	44.6257	1379.06	7.13e-05	ATTACCCT	0
chr6	56147	56155	chr6_56147_56155_-	1. OR;XO;PBXO	-	1. OR;XO;PBXO	347.13	954.702	65.4412	9.03811	2016.48	0.000364	GTGACCCG	1
chr5	561549	561557	chr5_561549_561557_-	1. OR;XO;PBXO	-	1. OR;XO;PBXO	718.68	954.702	1082.14	29.1955	447.099	7.13e-05	ATTACCCT	0
chr7	800269	800277	chr7_800269_800277_+	1. OR;XO;PBXO	+	1. OR;XO;PBXO	1355.38	952.543	2569.07	85.8621	882.114	5.35e-05	CTTACCCG	0
chr9	382380	382388	chr9_382380_382388_-	1. OR;XO;PBXO	-	1. OR;XO;PBXO	263.4	951.824	236.803	15.1329	756.745	0.000312	ATAACCCT	1
chr15	153651	153659	chr15_153651_153659_-	1. OR;XO;PBXO	-	1. OR;XO;PBXO	240.723	951.104	278.631	166.759	498.455	8.6e-05	CTTACCCT	0
chr10	434806	434814	chr10_434806_434814_+	1. OR;XO;PBXO	+	1. OR;XO;PBXO	3582.93	950.385	8215.91	97.8733	2132.78	8.6e-05	CTTACCCT	0
chr7	473064	473072	chr7_473064_473072_+	1. OR;XO;PBXO	+	1. OR;XO;PBXO	95.9403	944.629	145.05	4.57852	471.266	0.000597	GTTGCCCT	1
chr2	273854	273862	chr2_273854_273862_+	1. OR;XO;PBXO	+	1. OR;XO;PBXO	406.438	942.831	1732.51	242.275	2146.38	0.000159	ATAACCCG	1
chr15	1064047	1064055	chr15_1064047_1064055_-	1. OR;XO;PBXO	-	1. OR;XO;PBXO	61.0529	933.118	879.746	14.0626	336.835	7.13e-05	ATTACCCT	0
chr12	293710	293718	chr12_293710_293718_+	1. OR;XO;PBXO	+	1. OR;XO;PBXO	390.739	929.521	1025.47	168.067	1024.1	0.00012	ATCACCCG	1
chr16	818187	818195	chr16_818187_818195_+	1. OR;XO;PBXO	+	1. OR;XO;PBXO	132.572	928.442	184.18	104.83	412.358	7.13e-05	ATTACCCT	0
chr7	754058	754066	chr7_754058_754066_+	1. OR;XO;PBXO	+	1. OR;XO;PBXO	395.972	925.564	418.284	24.4683	445.588	0.000183	GCTACCCG	1
chr4	1369557	1369565	chr4_1369557_1369565_+	1. OR;XO;PBXO	+	1. OR;XO;PBXO	1018.71	923.406	3517.63	251.016	572.468	1.21e-05	GTTACCCG	0
chr10	606541	606549	chr10_606541_606549_+	1. OR;XO;PBXO	+	1. OR;XO;PBXO	172.693	922.327	0	3.86498	391.211	5.35e-05	CTTACCCG	0
chr16	32894	32902	chr16_32894_32902_+	1. OR;XO;PBXO	+	1. OR;XO;PBXO	1371.07	921.967	3312.54	111.817	628.355	2.67e-05	ATTACCCG	0
chr11	21075	21083	chr11_21075_21083_+	1. OR;XO;PBXO	+	1. OR;XO;PBXO	341.896	919.089	2395.69	3.95418	749.192	2.67e-05	ATTACCCG	0
chr15	759662	759670	chr15_759662_759670_+	1. OR;XO;PBXO	+	1. OR;XO;PBXO	2818.9	919.089	2297.19	269.924	2688.63	2.67e-05	ATTACCCG	0
chr14	66319	66327	chr14_66319_66327_+	1. OR;XO;PBXO	+	1. OR;XO;PBXO	148.271	916.571	557.262	73.6428	427.463	0.000132	GTTACCCC	1
chr13	30384	30392	chr13_30384_30392_+	1. OR;XO;PBXO	+	1. OR;XO;PBXO	603.552	916.211	634.172	51.761	456.162	0.000908	CTTAACCG	1
chr15	373604	373612	chr15_373604_373612_+	1. OR;XO;PBXO	+	1. OR;XO;PBXO	1100.7	916.211	3871.83	243.583	557.363	1.21e-05	GTTACCCG	0
chr4	453916	453924	chr4_453916_453924_-	1. OR;XO;PBXO	-	1. OR;XO;PBXO	982.08	915.132	5657.63	113.601	950.085	2.67e-05	ATTACCCG	0
chr13	30390	30398	chr13_30390_30398_-	1. OR;XO;PBXO	-	1. OR;XO;PBXO	589.597	915.132	738.743	51.761	428.973	0.000183	GCTACCCG	1
chr13	370667	370675	chr13_370667_370675_-	1. OR;XO;PBXO	-	1. OR;XO;PBXO	357.596	914.053	920.899	154.064	696.326	0.000132	GTTACCCC	1
chr13	370670	370678	chr13_370670_370678_+	1. OR;XO;PBXO	+	1. OR;XO;PBXO	361.084	914.053	920.899	154.064	696.326	0.000108	GTAACCCG	1
chr9	60944	60952	chr9_60944_60952_+	1. OR;XO;PBXO	+	1. OR;XO;PBXO	647.161	908.657	153.146	75.3672	364.023	2.67e-05	ATTACCCG	0
chr13	763395	763403	chr13_763395_763403_+	1. OR;XO;PBXO	+	1. OR;XO;PBXO	167.459	905.779	3027.16	3.92444	324.751	1.21e-05	GTTACCCG	0
chr12	1043167	1043175	chr12_1043167_1043175_-	1. OR;XO;PBXO	-	1. OR;XO;PBXO	90.7072	900.384	39.1298	32.7334	453.141	0.000805	GCAACCCG	2
chr4	1071786	1071794	chr4_1071786_1071794_-	1. OR;XO;PBXO	-	1. OR;XO;PBXO	982.08	900.024	1411.37	225.21	570.957	4.14e-05	GTTACCCT	0
chr2	111293	111301	chr2_111293_111301_+	1. OR;XO;PBXO	+	1. OR;XO;PBXO	2634	899.304	2799.13	456.365	1566.36	1.21e-05	GTTACCCG	0
chr15	267673	267681	chr15_267673_267681_+	1. OR;XO;PBXO	+	1. OR;XO;PBXO	232.001	898.945	1173.22	27.6198	620.803	1.21e-05	GTTACCCG	0
chr12	559339	559347	chr12_559339_559347_+	1. OR;XO;PBXO	+	1. OR;XO;PBXO	263.4	896.427	3189.75	82.6215	288.5	2.67e-05	ATTACCCG	0
chr7	428431	428439	chr7_428431_428439_+	1. OR;XO;PBXO	+	1. OR;XO;PBXO	207.58	896.067	14.1677	112.828	578.51	7.13e-05	ATTACCCT	0
chr11	354019	354027	chr11_354019_354027_+	1. OR;XO;PBXO	+	1. OR;XO;PBXO	104.662	894.628	0	3.71633	324.751	8.6e-05	CTTACCCT	0
chr2	407661	407669	chr2_407661_407669_+	1. OR;XO;PBXO	+	1. OR;XO;PBXO	62.7973	894.628	0	3.95418	306.625	4.14e-05	GTTACCCT	0
chr16	147276	147284	chr16_147276_147284_+	1. OR;XO;PBXO	+	1. OR;XO;PBXO	535.521	892.829	580.875	49.2339	421.421	0.000213	TTTACCCG	1
chr7	385709	385717	chr7_385709_385717_+	1. OR;XO;PBXO	+	1. OR;XO;PBXO	62.7973	892.47	263.114	5.9164	481.84	0.000183	GCTACCCG	1
chr5	73446	73454	chr5_73446_73454_-	1. OR;XO;PBXO	-	1. OR;XO;PBXO	528.544	891.391	2298.54	95.2272	493.923	4.14e-05	GTTACCCT	0
chr13	135333	135341	chr13_135333_135341_+	1. OR;XO;PBXO	+	1. OR;XO;PBXO	286.077	890.671	1784.45	171.546	605.698	0.000159	ATAACCCG	1
chr14	216427	216435	chr14_216427_216435_-	1. OR;XO;PBXO	-	1. OR;XO;PBXO	2133.36	888.513	1691.35	28.7198	709.92	7.13e-05	ATTACCCT	0
chr7	210250	210258	chr7_210250_210258_+	1. OR;XO;PBXO	+	1. OR;XO;PBXO	90.7072	886.354	0	55.5071	403.295	0.000609	CCTACCCT	1
chr7	210241	210249	chr7_210241_210249_-	1. OR;XO;PBXO	-	1. OR;XO;PBXO	88.9628	885.635	0	55.5071	418.4	7.13e-05	ATTACCCT	0
chr1	43366	43374	chr1_43366_43374_-	1. OR;XO;PBXO	-	1. OR;XO;PBXO	64.5417	882.397	0	11.149	435.015	8.6e-05	CTTACCCT	0
chr4	1375953	1375961	chr4_1375953_1375961_-	1. OR;XO;PBXO	-	1. OR;XO;PBXO	106.407	881.678	745.49	7.49212	492.413	0.000159	ATAACCCG	1
chr13	652115	652123	chr13_652115_652123_+	1. OR;XO;PBXO	+	1. OR;XO;PBXO	859.974	880.239	4702.32	54.4368	560.384	1.21e-05	GTTACCCG	0
chr4	352480	352488	chr4_352480_352488_+	1. OR;XO;PBXO	+	1. OR;XO;PBXO	174.437	880.239	1784.45	6.51101	368.554	0.00012	ATCACCCG	1
chr15	900073	900081	chr15_900073_900081_+	1. OR;XO;PBXO	+	1. OR;XO;PBXO	362.829	880.239	2737.06	91.4515	657.054	1.21e-05	GTTACCCG	0
chr15	371534	371542	chr15_371534_371542_-	1. OR;XO;PBXO	-	1. OR;XO;PBXO	198.858	879.52	700.288	44.7446	321.73	1.21e-05	GTTACCCG	0
chr8	448113	448121	chr8_448113_448121_+	1. OR;XO;PBXO	+	1. OR;XO;PBXO	99.4291	879.16	557.937	32.4956	475.798	7.13e-05	ATTACCCT	0
chr10	381878	381886	chr10_381878_381886_+	1. OR;XO;PBXO	+	1. OR;XO;PBXO	99.4291	878.8	0	3.92444	510.538	0.000173	GTTACCCA	1
chr2	679340	679348	chr2_679340_679348_-	1. OR;XO;PBXO	-	1. OR;XO;PBXO	439.581	876.642	163.94	144.223	364.023	0.000213	TTTACCCG	1
chr13	832650	832658	chr13_832650_832658_-	1. OR;XO;PBXO	-	1. OR;XO;PBXO	88.9628	873.404	0	4.90556	496.944	8.6e-05	CTTACCCT	0
chr16	700314	700322	chr16_700314_700322_+	1. OR;XO;PBXO	+	1. OR;XO;PBXO	404.694	872.685	259.066	10.8814	401.785	2.67e-05	ATTACCCG	0
chr1	73208	73216	chr1_73208_73216_-	1. OR;XO;PBXO	-	1. OR;XO;PBXO	216.302	871.246	0	3.21091	312.667	0.000159	GTCACCCT	1
chr14	220530	220538	chr14_220530_220538_+	1. OR;XO;PBXO	+	1. OR;XO;PBXO	1392.01	866.57	3978.42	186.946	789.975	9.59e-05	GTCACCCG	1
chr5	58234	58242	chr5_58234_58242_+	1. OR;XO;PBXO	+	1. OR;XO;PBXO	1069.3	864.771	1610.39	177.135	1081.5	1.21e-05	GTTACCCG	0
chr16	211989	211997	chr16_211989_211997_+	1. OR;XO;PBXO	+	1. OR;XO;PBXO	709.958	864.411	2851.75	459.992	672.159	2.67e-05	ATTACCCG	0
chr7	1022486	1022494	chr7_1022486_1022494_-	1. OR;XO;PBXO	-	1. OR;XO;PBXO	1618.77	862.973	6171.71	137.296	1421.35	2.67e-05	ATTACCCG	0
chr10	137928	137936	chr10_137928_137936_+	1. OR;XO;PBXO	+	1. OR;XO;PBXO	90.7072	860.454	506.663	2.58657	318.709	0.000662	CTGACCCG	1
chr16	309972	309980	chr16_309972_309980_-	1. OR;XO;PBXO	-	1. OR;XO;PBXO	1287.34	858.656	4949.92	14.9545	2273.26	4.14e-05	GTTACCCT	0
chr4	751093	751101	chr4_751093_751101_+	1. OR;XO;PBXO	+	1. OR;XO;PBXO	144.783	856.857	1.3493	16.4113	341.366	0.000724	CTTGCCCG	1
chr13	832621	832629	chr13_832621_832629_-	1. OR;XO;PBXO	-	1. OR;XO;PBXO	61.0529	856.498	0	4.90556	516.58	0.000597	GTTGCCCT	1
chr11	220152	220160	chr11_220152_220160_+	1. OR;XO;PBXO	+	1. OR;XO;PBXO	287.821	854.699	589.645	13.2301	537.727	0.000183	GCTACCCG	1
chr15	445369	445377	chr15_445369_445377_+	1. OR;XO;PBXO	+	1. OR;XO;PBXO	205.836	851.821	0	2.6163	466.735	0.000173	GTTACCCA	1
chr16	648471	648479	chr16_648471_648479_+	1. OR;XO;PBXO	+	1. OR;XO;PBXO	141.294	846.425	169.338	70.9373	338.345	5.35e-05	CTTACCCG	0
chr7	92399	92407	chr7_92399_92407_-	1. OR;XO;PBXO	-	1. OR;XO;PBXO	366.318	843.548	949.909	79.4105	1188.74	0.000108	GTAACCCG	1
chr15	55696	55704	chr15_55696_55704_-	1. OR;XO;PBXO	-	1. OR;XO;PBXO	99.4291	842.109	1818.19	2.2298	564.915	8.6e-05	CTTACCCT	0
chr4	810298	810306	chr4_810298_810306_+	1. OR;XO;PBXO	+	1. OR;XO;PBXO	69.7748	831.317	0	2.28926	362.512	7.13e-05	ATTACCCT	0
chr10	585925	585933	chr10_585925_585933_+	1. OR;XO;PBXO	+	1. OR;XO;PBXO	4210.91	828.799	13286.6	342.2	2271.74	1.21e-05	GTTACCCG	0
chr8	443251	443259	chr8_443251_443259_+	1. OR;XO;PBXO	+	1. OR;XO;PBXO	85.4741	827.36	136.954	2.67576	412.358	0.000173	GTTACCCA	1
chr15	446288	446296	chr15_446288_446296_+	1. OR;XO;PBXO	+	1. OR;XO;PBXO	68.0304	827	83.6568	4.54879	409.337	7.13e-05	ATTACCCT	0
chr15	418062	418070	chr15_418062_418070_+	1. OR;XO;PBXO	+	1. OR;XO;PBXO	102.918	826.281	913.478	6.15424	270.374	2.67e-05	ATTACCCG	0
chr15	987088	987096	chr15_987088_987096_-	1. OR;XO;PBXO	-	1. OR;XO;PBXO	69.7748	825.561	1181.31	2.73522	442.567	0.000264	ATCACCCT	1
chr8	150868	150876	chr8_150868_150876_+	1. OR;XO;PBXO	+	1. OR;XO;PBXO	141.294	823.403	324.507	22.0304	460.693	5.35e-05	CTTACCCG	0
chr13	272978	272986	chr13_272978_272986_-	1. OR;XO;PBXO	-	1. OR;XO;PBXO	807.643	822.324	5256.89	106.168	1131.34	4.14e-05	GTTACCCT	0
chr15	639711	639719	chr15_639711_639719_-	1. OR;XO;PBXO	-	1. OR;XO;PBXO	242.467	821.964	541.745	7.70024	389.701	4.14e-05	GTTACCCT	0
chr4	1263748	1263756	chr4_1263748_1263756_-	1. OR;XO;PBXO	-	1. OR;XO;PBXO	75.0079	820.885	62.7426	6.12451	507.517	0.000108	GTAACCCG	1
chr11	519492	519500	chr11_519492_519500_+	1. OR;XO;PBXO	+	1. OR;XO;PBXO	313.986	820.166	0	6.06505	312.667	0.000354	TTTACCCT	1
chr2	218720	218728	chr2_218720_218728_+	1. OR;XO;PBXO	+	1. OR;XO;PBXO	61.0529	819.086	103.896	5.05421	400.274	4.14e-05	GTTACCCT	0
chr14	500687	500695	chr14_500687_500695_+	1. OR;XO;PBXO	+	1. OR;XO;PBXO	3666.66	819.086	5978.76	55.6855	971.231	1.21e-05	GTTACCCG	0
chr8	75224	75232	chr8_75224_75232_-	1. OR;XO;PBXO	-	1. OR;XO;PBXO	242.467	818.367	3921.75	23.9034	558.873	1.21e-05	GTTACCCG	0
chr4	304944	304952	chr4_304944_304952_+	1. OR;XO;PBXO	+	1. OR;XO;PBXO	163.971	814.05	779.223	66.8939	344.387	4.14e-05	GTTACCCT	0
chr14	6751	6759	chr14_6751_6759_+	1. OR;XO;PBXO	+	1. OR;XO;PBXO	6398.35	814.05	7699.12	27.3225	3096.46	7.13e-05	ATTACCCT	0
chr6	95608	95616	chr6_95608_95616_+	1. OR;XO;PBXO	+	1. OR;XO;PBXO	165.715	813.331	779.897	3.15145	684.242	0.000805	GCAACCCG	2
chr7	272982	272990	chr7_272982_272990_+	1. OR;XO;PBXO	+	1. OR;XO;PBXO	992.546	813.331	1963.91	27.4414	545.279	0.000183	GCTACCCG	1
chr2	201870	201878	chr2_201870_201878_-	1. OR;XO;PBXO	-	1. OR;XO;PBXO	2330.48	810.813	1505.82	189.473	3023.96	4.14e-05	GTTACCCT	0
chr2	201873	201881	chr2_201873_201881_+	1. OR;XO;PBXO	+	1. OR;XO;PBXO	2463.05	807.575	1505.82	189.473	3017.92	0.000783	GTAACCCA	2
chr5	266171	266179	chr5_266171_266179_-	1. OR;XO;PBXO	-	1. OR;XO;PBXO	298.287	805.057	990.389	46.5285	2131.27	0.000805	GCAACCCG	2
chr4	52298	52306	chr4_52298_52306_-	1. OR;XO;PBXO	-	1. OR;XO;PBXO	1861.24	803.978	3000.85	158.375	1228.01	1.21e-05	GTTACCCG	0
chr4	1322071	1322079	chr4_1322071_1322079_+	1. OR;XO;PBXO	+	1. OR;XO;PBXO	151.76	803.978	0	77.2402	345.897	5.35e-05	CTTACCCG	0
chr10	192323	192331	chr10_192323_192331_+	1. OR;XO;PBXO	+	1. OR;XO;PBXO	307.009	803.618	91.078	78.3105	382.149	0.000282	ATTACCCA	1
chr8	281123	281131	chr8_281123_281131_-	1. OR;XO;PBXO	-	1. OR;XO;PBXO	69.7748	803.618	0	2.64603	370.065	0.000132	GTTACCCC	1
chr3	163741	163749	chr3_163741_163749_+	1. OR;XO;PBXO	+	1. OR;XO;PBXO	141.294	801.1	760.332	4.0731	521.112	0.000704	GCCACCCG	2
chr5	254541	254549	chr5_254541_254549_+	1. OR;XO;PBXO	+	1. OR;XO;PBXO	2567.71	798.582	4515.44	641.647	989.357	4.14e-05	GTTACCCT	0
chr7	672041	672049	chr7_672041_672049_-	1. OR;XO;PBXO	-	1. OR;XO;PBXO	212.813	797.503	476.304	34.7254	348.918	0.000213	TTTACCCG	1
chr12	633468	633476	chr12_633468_633476_-	1. OR;XO;PBXO	-	1. OR;XO;PBXO	101.173	793.546	290.1	11.476	333.814	0.000183	GCTACCCG	1
chr4	1135566	1135574	chr4_1135566_1135574_+	1. OR;XO;PBXO	+	1. OR;XO;PBXO	594.83	792.827	1995.62	89.2811	2667.49	1.21e-05	GTTACCCG	0
chr11	462913	462921	chr11_462913_462921_-	1. OR;XO;PBXO	-	1. OR;XO;PBXO	1753.09	788.15	3192.45	200.176	4446.82	2.67e-05	ATTACCCG	0
chr16	100308	100316	chr16_100308_100316_+	1. OR;XO;PBXO	+	1. OR;XO;PBXO	1418.17	786.352	2746.51	37.2822	454.651	2.67e-05	ATTACCCG	0
chr2	497028	497036	chr2_497028_497036_-	1. OR;XO;PBXO	-	1. OR;XO;PBXO	573.898	784.193	3631.65	459.19	870.03	1.21e-05	GTTACCCG	0
chr16	321943	321951	chr16_321943_321951_+	1. OR;XO;PBXO	+	1. OR;XO;PBXO	671.582	782.395	2288.42	127.544	1101.13	9.59e-05	GTCACCCG	1
chr16	732158	732166	chr16_732158_732166_-	1. OR;XO;PBXO	-	1. OR;XO;PBXO	150.016	781.316	0	3.12172	368.554	0.000573	AATACCCG	1
chr10	503851	503859	chr10_503851_503859_-	1. OR;XO;PBXO	-	1. OR;XO;PBXO	115.128	776.639	813.63	10.7625	438.036	7.13e-05	ATTACCCT	0
chr10	63466	63474	chr10_63466_63474_-	1. OR;XO;PBXO	-	1. OR;XO;PBXO	62.7973	775.92	23.6128	2.20007	460.693	4.14e-05	GTTACCCT	0
chr4	129571	129579	chr4_129571_129579_+	1. OR;XO;PBXO	+	1. OR;XO;PBXO	394.227	773.762	93.7766	16.8275	492.413	7.13e-05	ATTACCCT	0
chr7	877568	877576	chr7_877568_877576_-	1. OR;XO;PBXO	-	1. OR;XO;PBXO	62.7973	773.042	1085.51	3.86498	380.638	0.000173	GTTACCCA	1
chr7	877571	877579	chr7_877571_877579_+	1. OR;XO;PBXO	+	1. OR;XO;PBXO	64.5417	772.323	1085.51	3.86498	380.638	0.000198	GTAACCCT	1
chr2	679356	679364	chr2_679356_679364_-	1. OR;XO;PBXO	-	1. OR;XO;PBXO	446.559	770.164	207.793	144.223	400.274	0.000819	AGTACCCT	1
chr8	381412	381420	chr8_381412_381420_-	1. OR;XO;PBXO	-	1. OR;XO;PBXO	530.288	769.805	264.463	55.0314	477.308	8.6e-05	CTTACCCT	0
chr13	169946	169954	chr13_169946_169954_+	1. OR;XO;PBXO	+	1. OR;XO;PBXO	551.221	769.805	3565.53	41.6526	1773.29	0.000173	GTTACCCA	1
chr12	570732	570740	chr12_570732_570740_-	1. OR;XO;PBXO	-	1. OR;XO;PBXO	132.572	769.805	758.308	13.468	460.693	7.13e-05	ATTACCCT	0
chr12	80409	80417	chr12_80409_80417_+	1. OR;XO;PBXO	+	1. OR;XO;PBXO	108.151	768.725	1026.15	15.1924	312.667	7.13e-05	ATTACCCT	0
chr8	134068	134076	chr8_134068_134076_+	1. OR;XO;PBXO	+	1. OR;XO;PBXO	92.4516	766.207	0.674652	5.26232	481.84	7.13e-05	ATTACCCT	0
chr7	1063304	1063312	chr7_1063304_1063312_-	1. OR;XO;PBXO	-	1. OR;XO;PBXO	368.062	766.207	1044.36	41.5634	712.941	2.67e-05	ATTACCCG	0
chr7	1026026	1026034	chr7_1026026_1026034_-	1. OR;XO;PBXO	-	1. OR;XO;PBXO	73.2635	765.848	3393.5	19.7114	454.651	0.000498	ATGACCCG	1
chr12	504210	504218	chr12_504210_504218_-	1. OR;XO;PBXO	-	1. OR;XO;PBXO	464.002	765.848	778.548	31.128	1101.13	0.000249	CTAACCCG	1
chr14	355602	355610	chr14_355602_355610_-	1. OR;XO;PBXO	-	1. OR;XO;PBXO	169.204	764.768	1086.19	4.60825	311.157	0.000457	GATACCCG	1
chr14	270064	270072	chr14_270064_270072_+	1. OR;XO;PBXO	+	1. OR;XO;PBXO	1775.77	763.689	733.346	46.142	2652.38	0.000132	GTTACCCC	1
chr2	273882	273890	chr2_273882_273890_-	1. OR;XO;PBXO	-	1. OR;XO;PBXO	425.626	761.171	2413.9	242.275	2149.4	7.13e-05	ATTACCCT	0
chr12	640155	640163	chr12_640155_640163_-	1. OR;XO;PBXO	-	1. OR;XO;PBXO	95.9403	760.452	379.829	24.0818	388.19	4.14e-05	GTTACCCT	0
chr10	146709	146717	chr10_146709_146717_-	1. OR;XO;PBXO	-	1. OR;XO;PBXO	177.926	760.092	874.348	3.18118	1386.61	0.000159	ATAACCCG	1
chr15	443347	443355	chr15_443347_443355_-	1. OR;XO;PBXO	-	1. OR;XO;PBXO	81.9854	758.653	1057.18	25.5684	424.442	0.000173	GTTACCCA	1
chr16	627133	627141	chr16_627133_627141_-	1. OR;XO;PBXO	-	1. OR;XO;PBXO	1672.85	757.574	4896.62	340.773	2306.49	2.67e-05	ATTACCCG	0
chr7	767336	767344	chr7_767336_767344_+	1. OR;XO;PBXO	+	1. OR;XO;PBXO	111.64	756.495	2345.09	37.9363	498.455	0.000132	GTTACCCC	1
chr1	39091	39099	chr1_39091_39099_+	1. OR;XO;PBXO	+	1. OR;XO;PBXO	130.828	752.538	861.53	40.3148	356.471	5.35e-05	CTTACCCG	0
chr12	645899	645907	chr12_645899_645907_-	1. OR;XO;PBXO	-	1. OR;XO;PBXO	872.185	752.538	414.911	7.34347	560.384	2.67e-05	ATTACCCG	0
chr12	585970	585978	chr12_585970_585978_-	1. OR;XO;PBXO	-	1. OR;XO;PBXO	828.575	751.099	2824.77	50.7799	613.25	0.000597	GTTGCCCT	1
chr14	350039	350047	chr14_350039_350047_+	1. OR;XO;PBXO	+	1. OR;XO;PBXO	409.927	750.02	1877.56	2.14061	922.896	0.000132	GTTACCCC	1
chr16	259530	259538	chr16_259530_259538_+	1. OR;XO;PBXO	+	1. OR;XO;PBXO	320.964	749.3	706.36	43.1094	344.387	0.000183	GCTACCCG	1
chr11	299252	299260	chr11_299252_299260_+	1. OR;XO;PBXO	+	1. OR;XO;PBXO	294.798	747.142	638.22	141.815	1289.94	9.59e-05	GTCACCCG	1
chr14	6771	6779	chr14_6771_6779_+	1. OR;XO;PBXO	+	1. OR;XO;PBXO	6654.77	746.782	7755.79	27.3225	3188.6	4.14e-05	GTTACCCT	0
chr4	1059070	1059078	chr4_1059070_1059078_-	1. OR;XO;PBXO	-	1. OR;XO;PBXO	319.22	744.984	89.054	212.515	774.87	0.000213	TTTACCCG	1
chr8	277817	277825	chr8_277817_277825_+	1. OR;XO;PBXO	+	1. OR;XO;PBXO	1139.07	744.624	248.272	201.276	534.706	4.14e-05	GTTACCCT	0
chr13	321778	321786	chr13_321778_321786_-	1. OR;XO;PBXO	-	1. OR;XO;PBXO	141.294	741.387	0	136.583	329.282	0.000213	TTTACCCG	1
chr2	80880	80888	chr2_80880_80888_-	1. OR;XO;PBXO	-	1. OR;XO;PBXO	279.099	740.307	343.398	45.1311	463.714	0.00012	ATCACCCG	1
chr15	128427	128435	chr15_128427_128435_-	1. OR;XO;PBXO	-	1. OR;XO;PBXO	704.725	739.948	2335.64	342.943	747.682	4.14e-05	GTTACCCT	0
chr13	652661	652669	chr13_652661_652669_-	1. OR;XO;PBXO	-	1. OR;XO;PBXO	279.099	737.07	4.72256	4.93529	300.583	0.000159	GTCACCCT	1
chr7	881879	881887	chr7_881879_881887_+	1. OR;XO;PBXO	+	1. OR;XO;PBXO	71.5191	733.113	0	2.11088	515.07	7.13e-05	ATTACCCT	0
chr1	101310	101318	chr1_101310_101318_+	1. OR;XO;PBXO	+	1. OR;XO;PBXO	202.347	731.314	33.0579	45.6663	477.308	7.13e-05	ATTACCCT	0
chr15	316331	316339	chr15_316331_316339_-	1. OR;XO;PBXO	-	1. OR;XO;PBXO	2452.58	731.314	3257.22	141.815	2738.48	2.67e-05	ATTACCCG	0
chr13	195903	195911	chr13_195903_195911_+	1. OR;XO;PBXO	+	1. OR;XO;PBXO	722.169	731.314	1700.8	147.077	3904.56	2.67e-05	ATTACCCG	0
chr12	498982	498990	chr12_498982_498990_+	1. OR;XO;PBXO	+	1. OR;XO;PBXO	123.85	730.595	91.078	1.8433	1493.85	7.13e-05	ATTACCCT	0
chr16	425512	425520	chr16_425512_425520_-	1. OR;XO;PBXO	-	1. OR;XO;PBXO	102.918	728.796	481.027	3.89471	586.062	0.000597	GTTGCCCT	1
chr13	628883	628891	chr13_628883_628891_+	1. OR;XO;PBXO	+	1. OR;XO;PBXO	2981.13	728.796	8222.65	320.883	1209.89	1.21e-05	GTTACCCG	0
chr4	300230	300238	chr4_300230_300238_-	1. OR;XO;PBXO	-	1. OR;XO;PBXO	83.7297	725.199	1146.91	12.1896	291.52	0.000294	ACTACCCG	1
chr8	51486	51494	chr8_51486_51494_+	1. OR;XO;PBXO	+	1. OR;XO;PBXO	90.7072	722.681	116.715	2.20007	418.4	0.000159	ATAACCCG	1
chr4	449487	449495	chr4_449487_449495_-	1. OR;XO;PBXO	-	1. OR;XO;PBXO	525.055	719.803	0	52.5043	320.219	0.000213	TTTACCCG	1
chr4	1013392	1013400	chr4_1013392_1013400_-	1. OR;XO;PBXO	-	1. OR;XO;PBXO	73.2635	719.084	51.2735	8.59216	274.905	0.000159	GTCACCCT	1
chr4	1013395	1013403	chr4_1013395_1013403_+	1. OR;XO;PBXO	+	1. OR;XO;PBXO	71.5191	717.645	51.2735	8.59216	264.332	0.000364	GTGACCCG	1
chr9	130135	130143	chr9_130135_130143_+	1. OR;XO;PBXO	+	1. OR;XO;PBXO	104.662	716.206	1123.97	1.78384	320.219	2.67e-05	ATTACCCG	0
chr5	250345	250353	chr5_250345_250353_-	1. OR;XO;PBXO	-	1. OR;XO;PBXO	1125.12	710.45	475.629	5.05421	1179.68	0.00043	CCTACCCG	1
chr16	340019	340027	chr16_340019_340027_-	1. OR;XO;PBXO	-	1. OR;XO;PBXO	1104.19	707.573	3245.07	16.7086	771.85	8.6e-05	CTTACCCT	0
chr12	208607	208615	chr12_208607_208615_+	1. OR;XO;PBXO	+	1. OR;XO;PBXO	655.883	707.213	3291.63	218.312	1202.33	1.21e-05	GTTACCCG	0
chr12	924637	924645	chr12_924637_924645_+	1. OR;XO;PBXO	+	1. OR;XO;PBXO	980.336	707.213	570.081	17.1546	643.46	0.00043	CCTACCCG	1
chr2	547835	547843	chr2_547835_547843_-	1. OR;XO;PBXO	-	1. OR;XO;PBXO	64.5417	704.695	829.147	12.7544	468.245	8.6e-05	CTTACCCT	0
chr16	38945	38953	chr16_38945_38953_-	1. OR;XO;PBXO	-	1. OR;XO;PBXO	2578.18	700.738	6221.64	355.757	1394.16	0.000249	CTAACCCG	1
chr2	306159	306167	chr2_306159_306167_+	1. OR;XO;PBXO	+	1. OR;XO;PBXO	76.7523	698.939	1063.93	27.1738	454.651	7.13e-05	ATTACCCT	0
chr4	677752	677760	chr4_677752_677760_-	1. OR;XO;PBXO	-	1. OR;XO;PBXO	130.828	698.58	1376.96	16.9762	459.182	7.13e-05	ATTACCCT	0
chr4	34150	34158	chr4_34150_34158_-	1. OR;XO;PBXO	-	1. OR;XO;PBXO	172.693	694.623	466.859	84.6729	509.028	0.000108	GTAACCCG	1
chr11	330176	330184	chr11_330176_330184_-	1. OR;XO;PBXO	-	1. OR;XO;PBXO	418.649	694.263	0	2.05141	1076.96	0.000573	AATACCCG	1
chr12	694228	694236	chr12_694228_694236_-	1. OR;XO;PBXO	-	1. OR;XO;PBXO	430.859	691.026	2200.04	106.584	371.575	2.67e-05	ATTACCCG	0
chr4	1429468	1429476	chr4_1429468_1429476_+	1. OR;XO;PBXO	+	1. OR;XO;PBXO	118.617	689.946	1152.3	2.02168	300.583	0.000249	CTAACCCG	1
chr4	1429476	1429484	chr4_1429476_1429484_+	1. OR;XO;PBXO	+	1. OR;XO;PBXO	116.873	689.227	1152.3	2.02168	294.541	4.14e-05	GTTACCCT	0
chr10	213552	213560	chr10_213552_213560_-	1. OR;XO;PBXO	-	1. OR;XO;PBXO	85.4741	684.551	126.16	5.05421	506.007	7.13e-05	ATTACCCT	0
chr12	819725	819733	chr12_819725_819733_-	1. OR;XO;PBXO	-	1. OR;XO;PBXO	92.4516	683.831	0	2.5271	324.751	8.6e-05	CTTACCCT	0
chr6	224493	224501	chr6_224493_224501_+	1. OR;XO;PBXO	+	1. OR;XO;PBXO	486.679	683.831	2861.2	5.58936	586.062	8.6e-05	CTTACCCT	0
chr15	464582	464590	chr15_464582_464590_-	1. OR;XO;PBXO	-	1. OR;XO;PBXO	884.395	677.716	7590.5	93.3542	756.745	1.21e-05	GTTACCCG	0
chr2	310476	310484	chr2_310476_310484_-	1. OR;XO;PBXO	-	1. OR;XO;PBXO	258.167	674.478	658.46	157.989	475.798	0.00012	ATCACCCG	1
chr5	205088	205096	chr5_205088_205096_+	1. OR;XO;PBXO	+	1. OR;XO;PBXO	725.658	667.644	2373.42	327.602	1351.87	0.000108	GTAACCCG	1
chr5	12107	12115	chr5_12107_12115_-	1. OR;XO;PBXO	-	1. OR;XO;PBXO	69.7748	666.205	196.324	12.249	584.551	0.000457	GATACCCG	1
chr3	51049	51057	chr3_51049_51057_+	1. OR;XO;PBXO	+	1. OR;XO;PBXO	216.302	664.406	1963.24	7.19482	1036.18	0.000686	GTCACCCA	2
chr10	79575	79583	chr10_79575_79583_+	1. OR;XO;PBXO	+	1. OR;XO;PBXO	242.467	663.687	168.663	19.8303	315.688	0.00012	ATCACCCG	1
chr11	514032	514040	chr11_514032_514040_+	1. OR;XO;PBXO	+	1. OR;XO;PBXO	476.213	662.967	887.841	89.1325	782.423	0.000405	GTTGCCCG	1
chr11	562416	562424	chr11_562416_562424_-	1. OR;XO;PBXO	-	1. OR;XO;PBXO	711.703	662.607	646.316	47.9555	552.832	2.67e-05	ATTACCCG	0
chr14	350011	350019	chr14_350011_350019_+	1. OR;XO;PBXO	+	1. OR;XO;PBXO	382.017	662.248	2932.04	2.14061	925.917	0.000364	GTGACCCG	1
chr4	629706	629714	chr4_629706_629714_+	1. OR;XO;PBXO	+	1. OR;XO;PBXO	247.7	661.169	1334.46	19.533	465.224	1.21e-05	GTTACCCG	0
chr7	107727	107735	chr7_107727_107735_-	1. OR;XO;PBXO	-	1. OR;XO;PBXO	266.889	657.931	978.919	15.4302	495.434	7.13e-05	ATTACCCT	0
chr12	65729	65737	chr12_65729_65737_+	1. OR;XO;PBXO	+	1. OR;XO;PBXO	132.572	656.852	0	22.8629	359.492	0.000597	GTTGCCCT	1
chr12	65476	65484	chr12_65476_65484_-	1. OR;XO;PBXO	-	1. OR;XO;PBXO	696.003	656.492	1546.98	13.0815	492.413	0.000132	GTTACCCC	1
chr14	480995	481003	chr14_480995_481003_+	1. OR;XO;PBXO	+	1. OR;XO;PBXO	66.286	656.492	0	3.56768	271.884	0.000686	GTAACCCC	2
chr12	841168	841176	chr12_841168_841176_+	1. OR;XO;PBXO	+	1. OR;XO;PBXO	251.189	656.132	5336.49	53.307	406.316	0.000223	CTCACCCG	1
chr8	214239	214247	chr8_214239_214247_-	1. OR;XO;PBXO	-	1. OR;XO;PBXO	195.369	655.773	0	22.5953	1601.1	0.000386	GGTACCCG	1
chr9	113626	113634	chr9_113626_113634_-	1. OR;XO;PBXO	-	1. OR;XO;PBXO	476.213	650.737	2051.62	51.6421	560.384	2.67e-05	ATTACCCG	0
chr5	336011	336019	chr5_336011_336019_-	1. OR;XO;PBXO	-	1. OR;XO;PBXO	90.7072	650.377	0	2.25953	273.395	0.000498	ATGACCCG	1
chr3	51046	51054	chr3_51046_51054_-	1. OR;XO;PBXO	-	1. OR;XO;PBXO	204.091	646.42	1963.24	7.19482	1034.67	0.000364	GTGACCCG	1
chr7	601476	601484	chr7_601476_601484_+	1. OR;XO;PBXO	+	1. OR;XO;PBXO	491.912	643.902	52.6228	34.6362	700.857	8.6e-05	CTTACCCT	0
chr2	615274	615282	chr2_615274_615282_-	1. OR;XO;PBXO	-	1. OR;XO;PBXO	66.286	643.183	472.931	1.87303	459.182	0.000498	ATGACCCG	1
chr8	98562	98570	chr8_98562_98570_-	1. OR;XO;PBXO	-	1. OR;XO;PBXO	1109.42	642.463	1302.75	34.9335	570.957	0.000223	CTCACCCG	1
chr15	618577	618585	chr15_618577_618585_-	1. OR;XO;PBXO	-	1. OR;XO;PBXO	1585.63	642.463	2979.26	112.352	983.315	2.67e-05	ATTACCCG	0
chr12	504224	504232	chr12_504224_504232_-	1. OR;XO;PBXO	-	1. OR;XO;PBXO	483.19	642.463	779.223	31.128	1102.64	0.000159	GTCACCCT	1
chr12	709557	709565	chr12_709557_709565_-	1. OR;XO;PBXO	-	1. OR;XO;PBXO	81.9854	641.024	0	1.81357	380.638	0.000805	CATACCCG	1
chr4	927037	927045	chr4_927037_927045_+	1. OR;XO;PBXO	+	1. OR;XO;PBXO	1116.4	638.146	2052.29	84.9404	625.334	8.6e-05	CTTACCCT	0
chr2	6267	6275	chr2_6267_6275_+	1. OR;XO;PBXO	+	1. OR;XO;PBXO	1317	633.83	2062.41	53.1584	972.742	8.6e-05	CTTACCCT	0
chr12	423818	423826	chr12_423818_423826_-	1. OR;XO;PBXO	-	1. OR;XO;PBXO	95.9403	632.751	821.726	1.99195	647.991	0.000386	GGTACCCG	1
chr10	745656	745664	chr10_745656_745664_-	1. OR;XO;PBXO	-	1. OR;XO;PBXO	1754.84	630.592	1285.21	1.78384	2709.78	0.000471	ACTACCCT	1
chr1	169125	169133	chr1_169125_169133_-	1. OR;XO;PBXO	-	1. OR;XO;PBXO	97.6847	630.233	1224.49	22.625	545.279	0.000546	GTGACCCT	1
chr1	169128	169136	chr1_169128_169136_+	1. OR;XO;PBXO	+	1. OR;XO;PBXO	92.4516	630.233	1224.49	22.625	548.3	9.59e-05	GTCACCCG	1
chr15	377985	377993	chr15_377985_377993_-	1. OR;XO;PBXO	-	1. OR;XO;PBXO	1636.22	625.556	906.732	11.2976	1847.3	0.000457	GATACCCG	1
chr11	309832	309840	chr11_309832_309840_-	1. OR;XO;PBXO	-	1. OR;XO;PBXO	104.662	621.599	1878.23	1.78384	276.416	0.000741	GTTAACCT	1
chr11	309834	309842	chr11_309834_309842_+	1. OR;XO;PBXO	+	1. OR;XO;PBXO	102.918	620.88	1878.23	1.78384	268.863	0.000486	GTTAACCG	1
chr7	532732	532740	chr7_532732_532740_-	1. OR;XO;PBXO	-	1. OR;XO;PBXO	214.557	619.801	401.418	126.534	353.45	0.000213	TTTACCCG	1
chr12	11436	11444	chr12_11436_11444_+	1. OR;XO;PBXO	+	1. OR;XO;PBXO	3816.68	619.801	3641.77	20.6331	1425.88	4.14e-05	GTTACCCT	0
chr9	350191	350199	chr9_350191_350199_-	1. OR;XO;PBXO	-	1. OR;XO;PBXO	626.229	618.362	617.981	81.3133	996.909	0.000213	TTTACCCG	1
chr15	445349	445357	chr15_445349_445357_-	1. OR;XO;PBXO	-	1. OR;XO;PBXO	214.557	618.002	0	2.6163	468.245	0.000546	GTGACCCT	1
chr13	312140	312148	chr13_312140_312148_+	1. OR;XO;PBXO	+	1. OR;XO;PBXO	237.234	617.283	1947.72	239.332	1255.2	0.000457	GATACCCG	1
chr9	355790	355798	chr9_355790_355798_-	1. OR;XO;PBXO	-	1. OR;XO;PBXO	179.67	614.764	0	2.28926	253.759	7.13e-05	ATTACCCT	0
chr4	1185950	1185958	chr4_1185950_1185958_+	1. OR;XO;PBXO	+	1. OR;XO;PBXO	465.747	614.764	437.174	41.0283	380.638	7.13e-05	ATTACCCT	0
chr12	366296	366304	chr12_366296_366304_+	1. OR;XO;PBXO	+	1. OR;XO;PBXO	184.903	611.887	0	6.2137	433.505	0.000597	GTTCCCCT	1
chr9	220865	220873	chr9_220865_220873_+	1. OR;XO;PBXO	+	1. OR;XO;PBXO	1289.09	610.448	3139.83	223.069	1474.22	2.67e-05	ATTACCCG	0
chr4	1443562	1443570	chr4_1443562_1443570_-	1. OR;XO;PBXO	-	1. OR;XO;PBXO	769.267	607.57	2206.11	157.305	435.015	0.000249	CTAACCCG	1
chr12	438171	438179	chr12_438171_438179_+	1. OR;XO;PBXO	+	1. OR;XO;PBXO	62.7973	603.613	1767.59	3.47849	294.541	8.6e-05	CTTACCCT	0
chr4	88115	88123	chr4_88115_88123_-	1. OR;XO;PBXO	-	1. OR;XO;PBXO	474.468	603.253	1198.86	157.81	406.316	1.21e-05	GTTACCCG	0
chr15	468086	468094	chr15_468086_468094_+	1. OR;XO;PBXO	+	1. OR;XO;PBXO	2032.19	602.534	2670.27	313.004	886.645	4.14e-05	GTTACCCT	0
chr15	849509	849517	chr15_849509_849517_+	1. OR;XO;PBXO	+	1. OR;XO;PBXO	654.139	599.656	1070	54.199	586.062	2.67e-05	ATTACCCG	0
chr15	849517	849525	chr15_849517_849525_-	1. OR;XO;PBXO	-	1. OR;XO;PBXO	655.883	598.937	991.063	54.199	596.635	0.000724	CTTCCCCG	1
chr13	296956	296964	chr13_296956_296964_+	1. OR;XO;PBXO	+	1. OR;XO;PBXO	1744.37	598.217	1677.18	30.4739	672.159	2.67e-05	ATTACCCG	0
chr6	90404	90412	chr6_90404_90412_+	1. OR;XO;PBXO	+	1. OR;XO;PBXO	3985.88	598.217	6136.63	19.8898	960.658	4.14e-05	GTTACCCT	0
chr10	745576	745584	chr10_745576_745584_-	1. OR;XO;PBXO	-	1. OR;XO;PBXO	4177.76	596.778	3091.25	72.2752	2975.62	7.13e-05	ATTACCCT	0
chr12	699748	699756	chr12_699748_699756_+	1. OR;XO;PBXO	+	1. OR;XO;PBXO	406.438	594.98	2465.85	130.042	431.994	5.35e-05	CTTACCCG	0
chr10	745645	745653	chr10_745645_745653_-	1. OR;XO;PBXO	-	1. OR;XO;PBXO	1697.27	594.26	1453.2	1.78384	2758.12	0.000471	ACTACCCT	1
chr13	26657	26665	chr13_26657_26665_-	1. OR;XO;PBXO	-	1. OR;XO;PBXO	851.252	594.26	3.37326	7.07589	527.154	0.000294	ACTACCCG	1
chr16	770867	770875	chr16_770867_770875_-	1. OR;XO;PBXO	-	1. OR;XO;PBXO	2684.58	588.865	3341.55	157.84	1327.7	1.21e-05	GTTACCCG	0
chr13	349990	349998	chr13_349990_349998_+	1. OR;XO;PBXO	+	1. OR;XO;PBXO	1503.65	587.066	1816.16	138.842	2206.79	2.67e-05	ATTACCCG	0
chr13	545795	545803	chr13_545795_545803_+	1. OR;XO;PBXO	+	1. OR;XO;PBXO	392.483	586.346	640.244	94.7218	459.182	2.67e-05	ATTACCCG	0
chr5	250532	250540	chr5_250532_250540_-	1. OR;XO;PBXO	-	1. OR;XO;PBXO	2902.63	584.908	2169	176.511	1170.61	2.67e-05	ATTACCCG	0
chr4	1359037	1359045	chr4_1359037_1359045_+	1. OR;XO;PBXO	+	1. OR;XO;PBXO	191.881	584.548	2235.12	96.1192	539.237	0.000573	AATACCCG	1
chr4	506819	506827	chr4_506819_506827_-	1. OR;XO;PBXO	-	1. OR;XO;PBXO	64.5417	582.39	596.392	3.38929	364.023	7.13e-05	ATTACCCT	0
chr7	547389	547397	chr7_547389_547397_-	1. OR;XO;PBXO	-	1. OR;XO;PBXO	153.505	581.67	849.386	2.14061	280.947	0.000364	GTGACCCG	1
chr12	108555	108563	chr12_108555_108563_-	1. OR;XO;PBXO	-	1. OR;XO;PBXO	279.099	579.152	118.739	6.57047	280.947	0.000546	GTGACCCT	1
chr7	962209	962217	chr7_962209_962217_+	1. OR;XO;PBXO	+	1. OR;XO;PBXO	2006.02	579.152	2475.97	165.481	1037.69	1.21e-05	GTTACCCG	0
chr16	731986	731994	chr16_731986_731994_+	1. OR;XO;PBXO	+	1. OR;XO;PBXO	280.843	578.433	850.061	7.07589	435.015	2.67e-05	ATTACCCG	0
chr13	247547	247555	chr13_247547_247555_+	1. OR;XO;PBXO	+	1. OR;XO;PBXO	148.271	576.994	815.654	185.876	705.389	0.000364	GTGACCCG	1
chr4	1429166	1429174	chr4_1429166_1429174_+	1. OR;XO;PBXO	+	1. OR;XO;PBXO	69.7748	576.274	5.39721	5.94613	389.701	0.000223	CTCACCCG	1
chr11	65819	65827	chr11_65819_65827_+	1. OR;XO;PBXO	+	1. OR;XO;PBXO	420.393	574.116	964.077	33.6551	563.405	7.13e-05	ATTACCCT	0
chr3	120636	120644	chr3_120636_120644_+	1. OR;XO;PBXO	+	1. OR;XO;PBXO	179.67	573.396	499.242	19.6222	317.198	0.000213	TTTACCCG	1
chr2	135911	135919	chr2_135911_135919_+	1. OR;XO;PBXO	+	1. OR;XO;PBXO	2054.87	573.037	2224.33	29.7901	4865.22	4.14e-05	GTTACCCT	0
chr4	1447129	1447137	chr4_1447129_1447137_+	1. OR;XO;PBXO	+	1. OR;XO;PBXO	1069.3	570.878	613.933	131.023	1406.25	0.000213	TTTACCCG	1
chr8	134380	134388	chr8_134380_134388_-	1. OR;XO;PBXO	-	1. OR;XO;PBXO	256.422	570.878	789.342	3.35956	634.397	0.00043	CCTACCCG	1
chr10	612214	612222	chr10_612214_612222_-	1. OR;XO;PBXO	-	1. OR;XO;PBXO	744.846	570.878	2695.23	132.361	702.368	1.21e-05	GTTACCCG	0
chr10	598483	598491	chr10_598483_598491_-	1. OR;XO;PBXO	-	1. OR;XO;PBXO	144.783	570.159	205.769	19.7114	445.588	2.67e-05	ATTACCCG	0
chr13	923866	923874	chr13_923866_923874_-	1. OR;XO;PBXO	-	1. OR;XO;PBXO	1393.75	568.72	2054.99	10.7328	821.695	8.6e-05	CTTACCCT	0
chr12	844048	844056	chr12_844048_844056_+	1. OR;XO;PBXO	+	1. OR;XO;PBXO	2581.67	565.842	2205.44	205.201	428.973	7.13e-05	ATTACCCT	0
chr9	122271	122279	chr9_122271_122279_+	1. OR;XO;PBXO	+	1. OR;XO;PBXO	3596.89	561.885	2650.71	153.261	1735.53	2.67e-05	ATTACCCG	0
chr15	796979	796987	chr15_796979_796987_+	1. OR;XO;PBXO	+	1. OR;XO;PBXO	701.237	560.087	377.13	87.973	439.546	5.35e-05	CTTACCCG	0
chr5	117906	117914	chr5_117906_117914_+	1. OR;XO;PBXO	+	1. OR;XO;PBXO	230.257	558.288	0	2.76495	389.701	0.000864	TTAACCCG	2
chr12	986950	986958	chr12_986950_986958_+	1. OR;XO;PBXO	+	1. OR;XO;PBXO	284.332	558.288	263.789	189.444	518.091	4.14e-05	GTTACCCT	0
chr16	282418	282426	chr16_282418_282426_-	1. OR;XO;PBXO	-	1. OR;XO;PBXO	83.7297	555.77	792.716	2.28926	357.981	0.000173	GTTACCCA	1
chr8	67639	67647	chr8_67639_67647_+	1. OR;XO;PBXO	+	1. OR;XO;PBXO	123.85	555.051	0	40.3742	431.994	0.000213	TTTACCCG	1
chr13	284708	284716	chr13_284708_284716_+	1. OR;XO;PBXO	+	1. OR;XO;PBXO	174.437	551.813	0.674652	27.7387	344.387	0.000724	CTTCCCCG	1
chr13	284701	284709	chr13_284701_284709_-	1. OR;XO;PBXO	-	1. OR;XO;PBXO	170.948	549.655	0	27.7387	336.835	0.000159	GTCACCCT	1
chr4	167598	167606	chr4_167598_167606_-	1. OR;XO;PBXO	-	1. OR;XO;PBXO	1972.88	544.978	4296.86	227.677	3465.02	2.67e-05	ATTACCCG	0
chr11	470747	470755	chr11_470747_470755_+	1. OR;XO;PBXO	+	1. OR;XO;PBXO	170.948	543.899	3695.07	3.18118	654.033	5.35e-05	CTTACCCG	0
chr13	169964	169972	chr13_169964_169972_+	1. OR;XO;PBXO	+	1. OR;XO;PBXO	584.364	543.18	3832.7	41.6526	1785.37	0.000173	GTTACCCA	1
chr2	691824	691832	chr2_691824_691832_+	1. OR;XO;PBXO	+	1. OR;XO;PBXO	1838.57	540.662	5403.96	630.825	2007.41	2.67e-05	ATTACCCG	0
chr10	374074	374082	chr10_374074_374082_+	1. OR;XO;PBXO	+	1. OR;XO;PBXO	354.107	539.942	2225	69.867	1019.57	0.000294	ACTACCCG	1
chr11	426079	426087	chr11_426079_426087_+	1. OR;XO;PBXO	+	1. OR;XO;PBXO	696.003	538.503	912.129	29.1658	1012.01	0.000213	TTTACCCG	1
chr14	91622	91630	chr14_91622_91630_+	1. OR;XO;PBXO	+	1. OR;XO;PBXO	139.55	536.705	655.087	34.7849	362.512	0.000282	ATTACCCA	1
chr4	690044	690052	chr4_690044_690052_-	1. OR;XO;PBXO	-	1. OR;XO;PBXO	61.0529	534.187	281.33	3.38929	212.976	0.000354	CTTACCCC	1
chr12	489433	489441	chr12_489433_489441_-	1. OR;XO;PBXO	-	1. OR;XO;PBXO	7361.24	531.669	400.743	10.5246	3137.24	0.000686	GTCACCCA	2
chr12	87073	87081	chr12_87073_87081_+	1. OR;XO;PBXO	+	1. OR;XO;PBXO	547.732	530.949	288.751	13.5572	450.12	9.59e-05	GTCACCCG	1
chr12	40531	40539	chr12_40531_40539_+	1. OR;XO;PBXO	+	1. OR;XO;PBXO	858.23	528.072	5146.92	144.967	1243.12	9.59e-05	GTCACCCG	1
chr12	40551	40559	chr12_40551_40559_+	1. OR;XO;PBXO	+	1. OR;XO;PBXO	1064.07	527.712	5331.77	144.967	1217.44	2.67e-05	ATTACCCG	0
chr2	135927	135935	chr2_135927_135935_-	1. OR;XO;PBXO	-	1. OR;XO;PBXO	1833.33	526.992	2100.86	29.7901	4866.73	0.000159	ATAACCCG	1
chr12	899047	899055	chr12_899047_899055_+	1. OR;XO;PBXO	+	1. OR;XO;PBXO	2442.12	523.035	2981.29	86.2783	2564.78	2.67e-05	ATTACCCG	0
chr13	159668	159676	chr13_159668_159676_-	1. OR;XO;PBXO	-	1. OR;XO;PBXO	155.249	522.676	314.388	3.06226	320.219	8.6e-05	CTTACCCT	0
chr11	581860	581868	chr11_581860_581868_+	1. OR;XO;PBXO	+	1. OR;XO;PBXO	676.815	521.237	3492	27.2927	416.889	7.13e-05	ATTACCCT	0
chr2	627422	627430	chr2_627422_627430_-	1. OR;XO;PBXO	-	1. OR;XO;PBXO	69.7748	520.158	82.3075	2.25953	436.525	0.000457	GATACCCG	1
chr12	143061	143069	chr12_143061_143069_-	1. OR;XO;PBXO	-	1. OR;XO;PBXO	109.895	517.999	933.043	18.4925	395.743	7.13e-05	ATTACCCT	0
chr11	330020	330028	chr11_330020_330028_-	1. OR;XO;PBXO	-	1. OR;XO;PBXO	2051.38	517.28	964.077	152.786	1453.07	5.35e-05	CTTACCCG	0
chr10	745628	745636	chr10_745628_745636_-	1. OR;XO;PBXO	-	1. OR;XO;PBXO	1662.38	515.481	1178.62	1.78384	2826.09	0.000445	CTAACCCT	1
chr2	62807	62815	chr2_62807_62815_+	1. OR;XO;PBXO	+	1. OR;XO;PBXO	198.858	513.683	694.891	28.5711	354.96	0.000213	TTTACCCG	1
chr14	200321	200329	chr14_200321_200329_-	1. OR;XO;PBXO	-	1. OR;XO;PBXO	68.0304	513.683	194.3	27.9765	462.203	0.000294	ACTACCCG	1
chr2	69652	69660	chr2_69652_69660_-	1. OR;XO;PBXO	-	1. OR;XO;PBXO	404.694	512.963	163.266	42.3662	459.182	2.67e-05	ATTACCCG	0
chr15	813836	813844	chr15_813836_813844_+	1. OR;XO;PBXO	+	1. OR;XO;PBXO	212.813	506.488	1280.49	265.465	502.986	9.59e-05	GTCACCCG	1
chr2	143000	143008	chr2_143000_143008_-	1. OR;XO;PBXO	-	1. OR;XO;PBXO	205.836	506.129	2947.55	31.1874	863.988	0.000386	GGTACCCG	1
chr4	301756	301764	chr4_301756_301764_+	1. OR;XO;PBXO	+	1. OR;XO;PBXO	61.0529	505.769	622.703	2.05141	347.408	0.000132	GTTACCCC	1
chr13	715561	715569	chr13_715561_715569_+	1. OR;XO;PBXO	+	1. OR;XO;PBXO	1189.66	505.049	3583.75	164.262	957.637	2.67e-05	ATTACCCG	0
chr7	115768	115776	chr7_115768_115776_-	1. OR;XO;PBXO	-	1. OR;XO;PBXO	558.198	504.33	2579.87	88.1811	1539.17	0.000108	GTAACCCG	1
chr15	1017682	1017690	chr15_1017682_1017690_-	1. OR;XO;PBXO	-	1. OR;XO;PBXO	907.072	500.733	414.911	135.839	593.614	7.13e-05	ATTACCCT	0
chr5	342717	342725	chr5_342717_342725_+	1. OR;XO;PBXO	+	1. OR;XO;PBXO	1051.85	498.934	688.145	4.60825	483.35	0.000213	TTTACCCG	1
chr13	353238	353246	chr13_353238_353246_+	1. OR;XO;PBXO	+	1. OR;XO;PBXO	62.7973	497.855	273.909	4.81636	243.185	0.000597	GTTGCCCT	1
chr11	334138	334146	chr11_334138_334146_-	1. OR;XO;PBXO	-	1. OR;XO;PBXO	859.974	494.258	1727.11	115.95	581.53	7.13e-05	ATTACCCT	0
chr12	63849	63857	chr12_63849_63857_+	1. OR;XO;PBXO	+	1. OR;XO;PBXO	5261.02	491.74	5294.67	373.684	2002.88	2.67e-05	ATTACCCG	0
chr3	316109	316117	chr3_316109_316117_-	1. OR;XO;PBXO	-	1. OR;XO;PBXO	2356.64	487.423	2068.48	5.88667	996.909	4.14e-05	GTTACCCT	0
chr16	38939	38947	chr16_38939_38947_+	1. OR;XO;PBXO	+	1. OR;XO;PBXO	2583.41	487.063	6221.64	355.757	1388.12	2.67e-05	ATTACCCG	0
chr13	550881	550889	chr13_550881_550889_-	1. OR;XO;PBXO	-	1. OR;XO;PBXO	219.791	484.905	81.6328	4.72717	487.881	7.13e-05	ATTACCCT	0
chr12	85140	85148	chr12_85140_85148_+	1. OR;XO;PBXO	+	1. OR;XO;PBXO	113.384	484.545	20.9142	1.99195	419.91	8.6e-05	CTTACCCT	0
chr7	200322	200330	chr7_200322_200330_-	1. OR;XO;PBXO	-	1. OR;XO;PBXO	1050.11	484.185	1570.59	164.41	477.308	0.000213	TTTACCCG	1
chr15	72914	72922	chr15_72914_72922_-	1. OR;XO;PBXO	-	1. OR;XO;PBXO	66.286	483.826	188.228	2.40818	365.533	0.000354	TTTACCCT	1
chr4	1417216	1417224	chr4_1417216_1417224_+	1. OR;XO;PBXO	+	1. OR;XO;PBXO	156.993	475.192	1535.51	55.626	533.195	0.00012	ATCACCCG	1
chr11	330170	330178	chr11_330170_330178_+	1. OR;XO;PBXO	+	1. OR;XO;PBXO	420.393	474.833	0	2.05141	1113.22	0.00051	AGTACCCG	1
chr9	219854	219862	chr9_219854_219862_+	1. OR;XO;PBXO	+	1. OR;XO;PBXO	76.7523	473.754	24.9621	2.46764	528.664	0.000198	GTAACCCT	1
chr7	974668	974676	chr7_974668_974676_+	1. OR;XO;PBXO	+	1. OR;XO;PBXO	108.151	473.034	410.863	9.54354	388.19	0.000108	GTAACCCG	1
chr15	611863	611871	chr15_611863_611871_+	1. OR;XO;PBXO	+	1. OR;XO;PBXO	1866.48	466.559	1502.45	355.341	1980.22	1.21e-05	GTTACCCG	0
chr7	889547	889555	chr7_889547_889555_-	1. OR;XO;PBXO	-	1. OR;XO;PBXO	122.106	465.48	0	4.22175	444.078	8.6e-05	CTTACCCT	0
chr15	33425	33433	chr15_33425_33433_-	1. OR;XO;PBXO	-	1. OR;XO;PBXO	102.918	465.48	0	2.64603	478.819	0.000237	ATTACCCC	1
chr7	41339	41347	chr7_41339_41347_+	1. OR;XO;PBXO	+	1. OR;XO;PBXO	1917.06	460.804	4466.87	392.801	711.431	2.67e-05	ATTACCCG	0
chr15	446303	446311	chr15_446303_446311_+	1. OR;XO;PBXO	+	1. OR;XO;PBXO	69.7748	456.847	58.02	4.54879	424.442	0.000264	ATCACCCT	1
chr15	949647	949655	chr15_949647_949655_+	1. OR;XO;PBXO	+	1. OR;XO;PBXO	1807.17	456.487	2699.28	556.885	1865.43	2.67e-05	ATTACCCG	0
chr13	514017	514025	chr13_514017_514025_-	1. OR;XO;PBXO	-	1. OR;XO;PBXO	298.287	455.408	0	21.7926	338.345	0.000213	TTTACCCG	1
chr15	911868	911876	chr15_911868_911876_+	1. OR;XO;PBXO	+	1. OR;XO;PBXO	247.7	455.408	293.473	26.2224	638.928	7.13e-05	ATTACCCT	0
chr6	93264	93272	chr6_93264_93272_+	1. OR;XO;PBXO	+	1. OR;XO;PBXO	92.4516	453.969	189.577	2.43791	333.814	0.00012	ATCACCCG	1
chr14	266784	266792	chr14_266784_266792_+	1. OR;XO;PBXO	+	1. OR;XO;PBXO	476.213	453.969	3090.58	33.3875	2147.89	2.67e-05	ATTACCCG	0
chr12	554307	554315	chr12_554307_554315_+	1. OR;XO;PBXO	+	1. OR;XO;PBXO	413.416	453.249	1340.53	53.6043	264.332	7.13e-05	ATTACCCT	0
chr16	281708	281716	chr16_281708_281716_+	1. OR;XO;PBXO	+	1. OR;XO;PBXO	812.876	452.17	1947.04	57.2018	658.564	0.000173	GTTACCCA	1
chr4	628731	628739	chr4_628731_628739_+	1. OR;XO;PBXO	+	1. OR;XO;PBXO	123.85	451.811	3.37326	9.69219	317.198	0.000294	ACTACCCG	1
chr15	919920	919928	chr15_919920_919928_+	1. OR;XO;PBXO	+	1. OR;XO;PBXO	95.9403	451.811	118.064	1.99195	398.764	0.000805	GCAACCCG	2
chr12	924632	924640	chr12_924632_924640_+	1. OR;XO;PBXO	+	1. OR;XO;PBXO	922.771	451.091	570.081	17.1546	634.397	0.000849	ATTCCCCT	1
chr7	953840	953848	chr7_953840_953848_+	1. OR;XO;PBXO	+	1. OR;XO;PBXO	1487.95	450.731	690.169	48.4015	785.444	5.35e-05	CTTACCCG	0
chr2	581594	581602	chr2_581594_581602_-	1. OR;XO;PBXO	-	1. OR;XO;PBXO	293.054	450.372	72.8624	60.0856	554.342	7.13e-05	ATTACCCT	0
chr12	1071466	1071474	chr12_1071466_1071474_-	1. OR;XO;PBXO	-	1. OR;XO;PBXO	1426.89	442.098	2413.9	111.074	7570.47	5.35e-05	CTTACCCG	0
chr2	618708	618716	chr2_618708_618716_+	1. OR;XO;PBXO	+	1. OR;XO;PBXO	626.229	440.299	0.674652	39.5418	1061.86	0.000213	TTTACCCG	1
chr12	576562	576570	chr12_576562_576570_+	1. OR;XO;PBXO	+	1. OR;XO;PBXO	66.286	439.58	0	1.75411	286.989	0.000364	GTGACCCG	1
chr14	656910	656918	chr14_656910_656918_-	1. OR;XO;PBXO	-	1. OR;XO;PBXO	115.128	436.342	0	3.24064	447.099	8.6e-05	CTTACCCT	0
chr10	745634	745642	chr10_745634_745642_-	1. OR;XO;PBXO	-	1. OR;XO;PBXO	1651.92	435.983	1189.41	1.78384	2789.84	0.000471	ACTACCCT	1
chr4	372100	372108	chr4_372100_372108_-	1. OR;XO;PBXO	-	1. OR;XO;PBXO	3338.72	434.904	3494.7	355.578	986.336	2.67e-05	ATTACCCG	0
chr14	108279	108287	chr14_108279_108287_+	1. OR;XO;PBXO	+	1. OR;XO;PBXO	507.612	434.184	445.27	7.90835	746.172	2.67e-05	ATTACCCG	0
chr7	316663	316671	chr7_316663_316671_+	1. OR;XO;PBXO	+	1. OR;XO;PBXO	1850.78	433.465	1097.66	593.245	1371.51	1.21e-05	GTTACCCG	0
chr4	1469565	1469573	chr4_1469565_1469573_-	1. OR;XO;PBXO	-	1. OR;XO;PBXO	113.384	429.508	510.037	3.12172	439.546	8.6e-05	CTTACCCT	0
chr11	82796	82804	chr11_82796_82804_-	1. OR;XO;PBXO	-	1. OR;XO;PBXO	383.761	428.069	752.911	83.3647	892.687	0.000457	GATACCCG	1
chr8	556434	556442	chr8_556434_556442_-	1. OR;XO;PBXO	-	1. OR;XO;PBXO	1965.9	427.709	4549.85	43.0202	1197.8	4.14e-05	GTTACCCT	0
chr14	695478	695486	chr14_695478_695486_-	1. OR;XO;PBXO	-	1. OR;XO;PBXO	432.604	424.472	465.51	121.004	501.476	0.00012	ATCACCCG	1
chr12	592331	592339	chr12_592331_592339_+	1. OR;XO;PBXO	+	1. OR;XO;PBXO	115.128	418.716	157.194	1.90276	424.442	0.00012	ATCACCCG	1
chr2	310501	310509	chr2_310501_310509_-	1. OR;XO;PBXO	-	1. OR;XO;PBXO	174.437	416.198	491.146	157.989	477.308	0.000159	ATAACCCG	1
chr5	13122	13130	chr5_13122_13130_-	1. OR;XO;PBXO	-	1. OR;XO;PBXO	165.715	414.399	2023.28	12.3977	418.4	0.000213	TTTACCCG	1
chr4	617382	617390	chr4_617382_617390_-	1. OR;XO;PBXO	-	1. OR;XO;PBXO	341.896	412.241	1275.09	29.6117	1013.52	7.13e-05	ATTACCCT	0
chr2	492991	492999	chr2_492991_492999_+	1. OR;XO;PBXO	+	1. OR;XO;PBXO	165.715	411.522	661.159	22.0899	353.45	5.35e-05	CTTACCCG	0
chr13	637177	637185	chr13_637177_637185_+	1. OR;XO;PBXO	+	1. OR;XO;PBXO	5107.51	410.443	2814.65	135.839	7260.82	1.21e-05	GTTACCCG	0
chr16	246368	246376	chr16_246368_246376_-	1. OR;XO;PBXO	-	1. OR;XO;PBXO	659.372	405.406	775.849	64.1587	592.104	2.67e-05	ATTACCCG	0
chr5	504939	504947	chr5_504939_504947_+	1. OR;XO;PBXO	+	1. OR;XO;PBXO	436.092	405.406	1135.44	32.8821	466.735	4.14e-05	GTTACCCT	0
chr8	11121	11129	chr8_11121_11129_+	1. OR;XO;PBXO	+	1. OR;XO;PBXO	160.482	404.687	103.222	136.701	290.01	0.000173	GTTACCCA	1
chr4	302832	302840	chr4_302832_302840_-	1. OR;XO;PBXO	-	1. OR;XO;PBXO	840.786	403.608	288.751	77.8051	563.405	0.000213	TTTACCCG	1
chr10	172310	172318	chr10_172310_172318_+	1. OR;XO;PBXO	+	1. OR;XO;PBXO	64.5417	403.608	31.034	2.73522	428.973	9.59e-05	GTCACCCG	1
chr9	117811	117819	chr9_117811_117819_+	1. OR;XO;PBXO	+	1. OR;XO;PBXO	1036.16	403.248	0	4.93529	646.481	0.00051	AGTACCCG	1
chr12	1057213	1057221	chr12_1057213_1057221_-	1. OR;XO;PBXO	-	1. OR;XO;PBXO	244.212	402.888	562.659	116.039	382.149	0.000213	TTTACCCG	1
chr9	268942	268950	chr9_268942_268950_+	1. OR;XO;PBXO	+	1. OR;XO;PBXO	106.407	402.529	766.404	34.4875	427.463	0.000159	ATAACCCG	1
chr15	179883	179891	chr15_179883_179891_+	1. OR;XO;PBXO	+	1. OR;XO;PBXO	118.617	397.852	179.457	2.70549	435.015	7.13e-05	ATTACCCT	0
chr15	378002	378010	chr15_378002_378010_-	1. OR;XO;PBXO	-	1. OR;XO;PBXO	1726.93	397.493	997.81	11.2976	1853.35	1.21e-05	GTTACCCG	0
chr5	481642	481650	chr5_481642_481650_-	1. OR;XO;PBXO	-	1. OR;XO;PBXO	143.038	395.334	0	10.703	454.651	0.000213	TTTACCCG	1
chr13	451527	451535	chr13_451527_451535_-	1. OR;XO;PBXO	-	1. OR;XO;PBXO	184.903	387.42	0	20.2168	364.023	2.67e-05	ATTACCCG	0
chr15	682319	682327	chr15_682319_682327_-	1. OR;XO;PBXO	-	1. OR;XO;PBXO	177.926	387.42	4957.34	109.438	576.999	1.21e-05	GTTACCCG	0
chr5	397429	397437	chr5_397429_397437_-	1. OR;XO;PBXO	-	1. OR;XO;PBXO	95.9403	385.622	0	1.81357	365.533	8.6e-05	CTTACCCT	0
chr3	291281	291289	chr3_291281_291289_-	1. OR;XO;PBXO	-	1. OR;XO;PBXO	118.617	384.902	0.674652	50.5421	329.282	0.000132	GTTACCCC	1
chr13	577564	577572	chr13_577564_577572_-	1. OR;XO;PBXO	-	1. OR;XO;PBXO	155.249	382.025	1376.96	77.9537	447.099	0.000173	GTTACCCA	1
chr13	577567	577575	chr13_577567_577575_+	1. OR;XO;PBXO	+	1. OR;XO;PBXO	153.505	381.665	1376.96	77.9537	444.078	0.000108	GTAACCCG	1
chr7	965844	965852	chr7_965844_965852_+	1. OR;XO;PBXO	+	1. OR;XO;PBXO	116.873	380.945	43.8524	32.6145	175.214	0.000213	TTTACCCG	1
chr14	591299	591307	chr14_591299_591307_+	1. OR;XO;PBXO	+	1. OR;XO;PBXO	87.2185	378.427	1113.85	26.6684	421.421	2.67e-05	ATTACCCG	0
chr15	421791	421799	chr15_421791_421799_+	1. OR;XO;PBXO	+	1. OR;XO;PBXO	1402.47	377.348	7813.14	372.347	584.551	1.21e-05	GTTACCCG	0
chr13	420506	420514	chr13_420506_420514_-	1. OR;XO;PBXO	-	1. OR;XO;PBXO	395.972	375.55	0	17.6005	383.659	4.14e-05	GTTACCCT	0
chr7	906235	906243	chr7_906235_906243_+	1. OR;XO;PBXO	+	1. OR;XO;PBXO	120.361	374.47	335.302	6.33263	388.19	2.67e-05	ATTACCCG	0
chr14	439405	439413	chr14_439405_439413_+	1. OR;XO;PBXO	+	1. OR;XO;PBXO	101.173	370.154	0	28.8387	385.17	0.000213	TTTACCCG	1
chr5	442353	442361	chr5_442353_442361_+	1. OR;XO;PBXO	+	1. OR;XO;PBXO	392.483	369.434	0	4.34067	370.065	0.000364	GTGACCCG	1
chr10	520346	520354	chr10_520346_520354_-	1. OR;XO;PBXO	-	1. OR;XO;PBXO	69.7748	366.197	67.4652	2.73522	404.806	0.000132	GTTACCCC	1
chr7	87376	87384	chr7_87376_87384_-	1. OR;XO;PBXO	-	1. OR;XO;PBXO	307.009	365.118	1451.85	70.3427	570.957	0.000108	GTAACCCG	1
chr12	437199	437207	chr12_437199_437207_-	1. OR;XO;PBXO	-	1. OR;XO;PBXO	437.837	364.758	1519.99	101.054	456.162	7.13e-05	ATTACCCT	0
chr12	579442	579450	chr12_579442_579450_-	1. OR;XO;PBXO	-	1. OR;XO;PBXO	69.7748	364.038	557.937	7.04616	502.986	0.000457	GATACCCG	1
chr15	614216	614224	chr15_614216_614224_-	1. OR;XO;PBXO	-	1. OR;XO;PBXO	97.6847	362.959	0	4.10283	386.68	2.67e-05	ATTACCCG	0
chr4	1493223	1493231	chr4_1493223_1493231_+	1. OR;XO;PBXO	+	1. OR;XO;PBXO	378.528	358.643	2108.96	43.05	2886.51	0.000457	GATACCCG	1
chr9	39313	39321	chr9_39313_39321_-	1. OR;XO;PBXO	-	1. OR;XO;PBXO	62.7973	354.326	0	47.569	297.562	0.000213	TTTACCCG	1
chr14	335877	335885	chr14_335877_335885_+	1. OR;XO;PBXO	+	1. OR;XO;PBXO	263.4	353.606	557.262	15.4599	516.58	5.35e-05	CTTACCCG	0
chr4	751459	751467	chr4_751459_751467_+	1. OR;XO;PBXO	+	1. OR;XO;PBXO	324.453	352.887	1080.79	99.8058	623.824	0.000183	GCTACCCG	1
chr13	798039	798047	chr13_798039_798047_+	1. OR;XO;PBXO	+	1. OR;XO;PBXO	2407.23	351.808	4612.59	10.6436	2507.38	1.21e-05	GTTACCCG	0
chr4	87339	87347	chr4_87339_87347_+	1. OR;XO;PBXO	+	1. OR;XO;PBXO	915.794	351.088	1358.07	47.9853	945.553	2.67e-05	ATTACCCG	0
chr12	1071884	1071892	chr12_1071884_1071892_-	1. OR;XO;PBXO	-	1. OR;XO;PBXO	272.122	344.973	1215.05	33.3875	1823.14	0.000237	ATTACCCC	1
chr13	158488	158496	chr13_158488_158496_-	1. OR;XO;PBXO	-	1. OR;XO;PBXO	1819.38	344.613	1529.44	9.30569	1675.11	5.35e-05	CTTACCCG	0
chr4	802734	802742	chr4_802734_802742_+	1. OR;XO;PBXO	+	1. OR;XO;PBXO	235.49	344.254	955.981	5.05421	395.743	0.00043	CCTACCCG	1
chr15	787013	787021	chr15_787013_787021_+	1. OR;XO;PBXO	+	1. OR;XO;PBXO	92.4516	335.98	688.145	33.6254	342.876	7.13e-05	ATTACCCT	0
chr4	1222579	1222587	chr4_1222579_1222587_-	1. OR;XO;PBXO	-	1. OR;XO;PBXO	71.5191	335.62	0	30.9199	329.282	4.14e-05	GTTACCCT	0
chr16	829197	829205	chr16_829197_829205_+	1. OR;XO;PBXO	+	1. OR;XO;PBXO	887.884	334.541	2961.72	17.4816	868.52	7.13e-05	ATTACCCT	0
chr4	1294528	1294536	chr4_1294528_1294536_-	1. OR;XO;PBXO	-	1. OR;XO;PBXO	223.279	325.548	2762.7	86.1297	321.73	5.35e-05	CTTACCCG	0
chr9	77442	77450	chr9_77442_77450_+	1. OR;XO;PBXO	+	1. OR;XO;PBXO	388.994	315.476	566.707	210.315	506.007	0.000213	TTTACCCG	1
chr12	131573	131581	chr12_131573_131581_-	1. OR;XO;PBXO	-	1. OR;XO;PBXO	811.132	310.44	1932.2	147.999	3854.72	2.67e-05	ATTACCCG	0
chr4	176496	176504	chr4_176496_176504_+	1. OR;XO;PBXO	+	1. OR;XO;PBXO	4990.64	309.361	5036.95	52.8313	2776.24	1.21e-05	GTTACCCG	0
chr14	783610	783618	chr14_783610_783618_-	1. OR;XO;PBXO	-	1. OR;XO;PBXO	1146.05	305.404	1416.09	13.795	931.959	8.6e-05	CTTACCCT	0
chr4	1229949	1229957	chr4_1229949_1229957_-	1. OR;XO;PBXO	-	1. OR;XO;PBXO	273.866	305.044	47.2256	20.2763	305.115	0.000213	TTTACCCG	1
chr15	82771	82779	chr15_82771_82779_-	1. OR;XO;PBXO	-	1. OR;XO;PBXO	95.9403	304.325	0	1.90276	376.107	0.000173	GTTACCCA	1
chr10	745556	745564	chr10_745556_745564_-	1. OR;XO;PBXO	-	1. OR;XO;PBXO	4212.65	299.289	2815.32	72.2752	3040.57	4.14e-05	GTTACCCT	0
chr10	432495	432503	chr10_432495_432503_-	1. OR;XO;PBXO	-	1. OR;XO;PBXO	258.167	296.77	1475.46	30.5928	474.287	0.000159	ATAACCCG	1
chr16	696971	696979	chr16_696971_696979_-	1. OR;XO;PBXO	-	1. OR;XO;PBXO	209.324	293.893	2065.78	161.467	530.175	4.14e-05	GTTACCCT	0
chr5	386395	386403	chr5_386395_386403_-	1. OR;XO;PBXO	-	1. OR;XO;PBXO	1568.19	292.094	77.5849	9.84084	631.376	1.21e-05	GTTACCCG	0
chr16	280338	280346	chr16_280338_280346_+	1. OR;XO;PBXO	+	1. OR;XO;PBXO	62.7973	286.698	673.977	28.482	569.447	0.000405	GTTGCCCG	1
chr16	413128	413136	chr16_413128_413136_+	1. OR;XO;PBXO	+	1. OR;XO;PBXO	2108.94	285.259	0	15.3113	604.187	8.6e-05	CTTACCCT	0
chr7	884371	884379	chr7_884371_884379_-	1. OR;XO;PBXO	-	1. OR;XO;PBXO	102.918	282.382	891.889	60.8586	518.091	0.000108	GTAACCCG	1
chr12	905205	905213	chr12_905205_905213_-	1. OR;XO;PBXO	-	1. OR;XO;PBXO	61.0529	281.662	229.382	2.73522	385.17	0.000237	ATTACCCC	1
chr11	20940	20948	chr11_20940_20948_+	1. OR;XO;PBXO	+	1. OR;XO;PBXO	839.042	281.302	3.37326	6.39209	1235.56	0.000991	GCTACCCC	2
chr15	348214	348222	chr15_348214_348222_+	1. OR;XO;PBXO	+	1. OR;XO;PBXO	62.7973	276.266	338	23.9034	509.028	9.59e-05	GTCACCCG	1
chr16	942694	942702	chr16_942694_942702_-	1. OR;XO;PBXO	-	1. OR;XO;PBXO	2286.87	273.748	1895.77	67.7561	799.038	8.6e-05	CTTACCCT	0
chr10	172332	172340	chr10_172332_172340_-	1. OR;XO;PBXO	-	1. OR;XO;PBXO	80.241	269.072	31.034	2.73522	436.525	0.000876	ATCACCCC	2
chr16	360064	360072	chr16_360064_360072_-	1. OR;XO;PBXO	-	1. OR;XO;PBXO	134.316	266.914	0	37.966	862.478	0.000213	TTTACCCG	1
chr4	1344768	1344776	chr4_1344768_1344776_+	1. OR;XO;PBXO	+	1. OR;XO;PBXO	78.4966	266.554	101.872	5.67855	333.814	0.000223	CTCACCCG	1
chr7	284290	284298	chr7_284290_284298_-	1. OR;XO;PBXO	-	1. OR;XO;PBXO	1957.18	264.036	4190.94	332.537	1764.23	2.67e-05	ATTACCCG	0
chr12	737887	737895	chr12_737887_737895_+	1. OR;XO;PBXO	+	1. OR;XO;PBXO	158.738	260.079	1220.44	9.54354	460.693	0.000534	ATTGCCCG	1
chr12	737882	737890	chr12_737882_737890_-	1. OR;XO;PBXO	-	1. OR;XO;PBXO	156.993	256.482	1220.44	9.54354	469.756	0.000893	AATACCCT	1
chr3	764	772	chr3_764_772_+	1. OR;XO;PBXO	+	1. OR;XO;PBXO	1763.56	256.122	1550.35	14.8059	0	8.6e-05	CTTACCCT	0
chr13	637193	637201	chr13_637193_637201_+	1. OR;XO;PBXO	+	1. OR;XO;PBXO	5681.41	253.964	3404.97	135.839	7294.05	1.21e-05	GTTACCCG	0
chr14	783710	783718	chr14_783710_783718_-	1. OR;XO;PBXO	-	1. OR;XO;PBXO	1222.8	252.884	1244.06	2.94333	1635.84	8.6e-05	CTTACCCT	0
chr13	513450	513458	chr13_513450_513458_+	1. OR;XO;PBXO	+	1. OR;XO;PBXO	252.934	251.805	0	95.7327	392.722	0.000213	TTTACCCG	1
chr4	1508071	1508079	chr4_1508071_1508079_-	1. OR;XO;PBXO	-	1. OR;XO;PBXO	69.7748	247.489	14.1677	1.90276	359.492	5.35e-05	CTTACCCG	0
chr13	225500	225508	chr13_225500_225508_-	1. OR;XO;PBXO	-	1. OR;XO;PBXO	83.7297	245.69	0	5.47044	321.73	0.000159	GTCACCCT	1
chr10	525900	525908	chr10_525900_525908_-	1. OR;XO;PBXO	-	1. OR;XO;PBXO	526.8	244.971	436.5	13.468	637.418	4.14e-05	GTTACCCT	0
chr12	11777	11785	chr12_11777_11785_+	1. OR;XO;PBXO	+	1. OR;XO;PBXO	915.794	244.971	580.2	15.0437	471.266	0.000937	ATCACCCA	2
chr4	521031	521039	chr4_521031_521039_-	1. OR;XO;PBXO	-	1. OR;XO;PBXO	218.046	244.611	794.74	4.51906	661.585	0.00043	CCTACCCG	1
chr4	778877	778885	chr4_778877_778885_-	1. OR;XO;PBXO	-	1. OR;XO;PBXO	498.89	244.611	1925.46	420.986	595.125	1.21e-05	GTTACCCG	0
chr7	888658	888666	chr7_888658_888666_-	1. OR;XO;PBXO	-	1. OR;XO;PBXO	1165.24	244.251	2881.44	114.344	1954.55	1.21e-05	GTTACCCG	0
chr12	11751	11759	chr12_11751_11759_+	1. OR;XO;PBXO	+	1. OR;XO;PBXO	1332.7	243.891	823.075	15.0437	510.538	8.6e-05	CTTACCCT	0
chr15	566354	566362	chr15_566354_566362_+	1. OR;XO;PBXO	+	1. OR;XO;PBXO	2433.4	240.654	8029.03	273.254	1007.48	2.67e-05	ATTACCCG	0
chr15	316594	316602	chr15_316594_316602_-	1. OR;XO;PBXO	-	1. OR;XO;PBXO	2916.59	238.136	6621.71	70.7292	2264.19	2.67e-05	ATTACCCG	0
chr5	178214	178222	chr5_178214_178222_+	1. OR;XO;PBXO	+	1. OR;XO;PBXO	252.934	234.179	0	5.55963	421.421	7.13e-05	ATTACCCT	0
chr7	345844	345852	chr7_345844_345852_+	1. OR;XO;PBXO	+	1. OR;XO;PBXO	3181.73	233.819	6465.19	244.267	1581.46	1.21e-05	GTTACCCG	0
chr15	371021	371029	chr15_371021_371029_+	1. OR;XO;PBXO	+	1. OR;XO;PBXO	167.459	233.459	46.551	39.5715	351.939	0.000237	ATTACCCC	1
chr4	323150	323158	chr4_323150_323158_-	1. OR;XO;PBXO	-	1. OR;XO;PBXO	115.128	224.466	0	4.63798	398.764	0.000198	GTAACCCT	1
chr2	135884	135892	chr2_135884_135892_-	1. OR;XO;PBXO	-	1. OR;XO;PBXO	1810.66	219.79	2281	29.7901	4803.29	0.000364	GTGACCCG	1
chr15	255191	255199	chr15_255191_255199_-	1. OR;XO;PBXO	-	1. OR;XO;PBXO	155.249	218.711	2035.42	179.038	972.742	0.000405	GTTGCCCG	1
chr15	402600	402608	chr15_402600_402608_-	1. OR;XO;PBXO	-	1. OR;XO;PBXO	62.7973	214.034	0	1.78384	351.939	0.000198	GTAACCCT	1
chr14	375114	375122	chr14_375114_375122_+	1. OR;XO;PBXO	+	1. OR;XO;PBXO	418.649	208.998	353.517	52.8313	811.122	0.000213	TTTACCCG	1
chr2	728742	728750	chr2_728742_728750_+	1. OR;XO;PBXO	+	1. OR;XO;PBXO	83.7297	200.365	1006.58	44.8635	380.638	0.000213	TTTACCCG	1
chr2	792287	792295	chr2_792287_792295_+	1. OR;XO;PBXO	+	1. OR;XO;PBXO	289.565	198.207	963.402	65.7642	422.931	4.14e-05	GTTACCCT	0
chr4	996397	996405	chr4_996397_996405_+	1. OR;XO;PBXO	+	1. OR;XO;PBXO	137.805	194.969	802.835	12.3382	315.688	0.000223	CTCACCCG	1
chr9	142747	142755	chr9_142747_142755_+	1. OR;XO;PBXO	+	1. OR;XO;PBXO	270.377	194.609	622.703	16.1437	697.837	8.6e-05	CTTACCCT	0
chr2	350886	350894	chr2_350886_350894_-	1. OR;XO;PBXO	-	1. OR;XO;PBXO	395.972	191.012	2224.33	45.0717	1453.07	5.35e-05	CTTACCCG	0
chr8	98586	98594	chr8_98586_98594_+	1. OR;XO;PBXO	+	1. OR;XO;PBXO	1665.87	182.019	1573.29	34.9335	578.51	0.000213	TTTACCCG	1
chr8	98610	98618	chr8_98610_98618_+	1. OR;XO;PBXO	+	1. OR;XO;PBXO	1964.16	181.3	299.545	34.9335	578.51	0.000457	GATACCCG	1
chr3	164424	164432	chr3_164424_164432_+	1. OR;XO;PBXO	+	1. OR;XO;PBXO	95.9403	179.861	1007.25	10.1679	694.816	0.000386	GGTACCCG	1
chr7	787096	787104	chr7_787096_787104_-	1. OR;XO;PBXO	-	1. OR;XO;PBXO	9822.54	172.666	5629.29	274.354	1681.15	1.21e-05	GTTACCCG	0
chr11	226270	226278	chr11_226270_226278_-	1. OR;XO;PBXO	-	1. OR;XO;PBXO	99.4291	172.307	0	6.03532	540.748	0.00051	AGTACCCG	1
chr14	412600	412608	chr14_412600_412608_-	1. OR;XO;PBXO	-	1. OR;XO;PBXO	4116.71	161.875	4454.72	154.807	2314.04	2.67e-05	ATTACCCG	0
chr13	67673	67681	chr13_67673_67681_+	1. OR;XO;PBXO	+	1. OR;XO;PBXO	1423.41	154.68	448.643	170.505	1093.58	5.35e-05	CTTACCCG	0
chr5	51712	51720	chr5_51712_51720_-	1. OR;XO;PBXO	-	1. OR;XO;PBXO	204.091	153.241	0	80.8376	462.203	0.000213	TTTACCCG	1
chr2	203257	203265	chr2_203257_203265_+	1. OR;XO;PBXO	+	1. OR;XO;PBXO	420.393	152.522	593.019	9.39488	957.637	0.000108	GTAACCCG	1
chr4	414890	414898	chr4_414890_414898_-	1. OR;XO;PBXO	-	1. OR;XO;PBXO	130.828	150.723	268.511	38.4417	271.884	0.000354	CTTACCCC	1
chr3	446	454	chr3_446_454_+	1. OR;XO;PBXO	+	1. OR;XO;PBXO	3422.45	146.407	1829.66	29.909	0	4.14e-05	GTTACCCT	0
chr13	5670	5678	chr13_5670_5678_+	1. OR;XO;PBXO	+	1. OR;XO;PBXO	1447.83	139.212	839.941	25.39	770.339	4.14e-05	GTTACCCT	0
chr16	743555	743563	chr16_743555_743563_-	1. OR;XO;PBXO	-	1. OR;XO;PBXO	73.2635	137.414	0	2.58657	315.688	0.00042	CTTACCCA	1
chr13	5650	5658	chr13_5650_5658_+	1. OR;XO;PBXO	+	1. OR;XO;PBXO	1133.84	129.86	666.556	25.39	768.829	7.13e-05	ATTACCCT	0
chr12	751896	751904	chr12_751896_751904_-	1. OR;XO;PBXO	-	1. OR;XO;PBXO	488.423	117.989	1713.61	167.265	1379.06	2.67e-05	ATTACCCG	0
chr12	1012624	1012632	chr12_1012624_1012632_-	1. OR;XO;PBXO	-	1. OR;XO;PBXO	73.2635	116.55	345.422	8.08673	333.814	8.6e-05	CTTACCCT	0
chr3	123971	123979	chr3_123971_123979_-	1. OR;XO;PBXO	-	1. OR;XO;PBXO	816.365	87.7721	124.136	71.4725	507.517	0.000213	TTTACCCG	1
chr3	790	798	chr3_790_798_+	1. OR;XO;PBXO	+	1. OR;XO;PBXO	1085	80.9374	262.439	14.8059	0	0.000937	ATCACCCA	2
chr16	627518	627526	chr16_627518_627526_+	1. OR;XO;PBXO	+	1. OR;XO;PBXO	980.336	74.8221	2189.24	17.0059	447.099	2.67e-05	ATTACCCG	0
chr15	144067	144075	chr15_144067_144075_+	1. OR;XO;PBXO	+	1. OR;XO;PBXO	711.703	62.9513	423.681	254.524	527.154	0.000213	TTTACCCG	1
chr11	309971	309979	chr11_309971_309979_+	2. OR;PBXO	+	2. OR;PBXO	41.8649	4942.22	625.402	54.3179	320.219	0.000173	GTTACCCA	1
chr5	414035	414043	chr5_414035_414043_+	2. OR;PBXO	+	2. OR;PBXO	43.6092	3970.97	2550.86	3.83525	392.722	8.6e-05	CTTACCCT	0
chr7	189474	189482	chr7_189474_189482_+	2. OR;PBXO	+	2. OR;PBXO	48.8423	3692.54	2126.5	1.8433	365.533	0.000198	GTAACCCT	1
chr4	21133	21141	chr4_21133_21141_+	2. OR;PBXO	+	2. OR;PBXO	41.8649	3404.05	785.294	3.18118	379.128	0.000108	GTAACCCG	1
chr5	558830	558838	chr5_558830_558838_+	2. OR;PBXO	+	2. OR;PBXO	45.3536	3284.98	2071.18	2.79468	415.379	0.000282	ATTACCCA	1
chr9	415886	415894	chr9_415886_415894_+	2. OR;PBXO	+	2. OR;PBXO	59.3086	3284.98	436.5	4.16229	447.099	4.14e-05	GTTACCCT	0
chr6	111439	111447	chr6_111439_111447_+	2. OR;PBXO	+	2. OR;PBXO	33.143	3074.18	947.211	2.14061	428.973	8.6e-05	CTTACCCT	0
chr15	929438	929446	chr15_929438_929446_-	2. OR;PBXO	-	2. OR;PBXO	54.0755	2975.62	2026.65	6.39209	447.099	4.14e-05	GTTACCCT	0
chr14	96099	96107	chr14_96099_96107_+	2. OR;PBXO	+	2. OR;PBXO	45.3536	2968.06	415.585	3.50822	454.651	0.000237	ATTACCCC	1
chr4	544425	544433	chr4_544425_544433_-	2. OR;PBXO	-	2. OR;PBXO	57.5642	2921.66	1277.12	7.64077	373.086	0.000183	GCTACCCG	1
chr13	526092	526100	chr13_526092_526100_-	2. OR;PBXO	-	2. OR;PBXO	34.8874	2825.97	263.789	1.87303	499.965	0.00042	CTTACCCA	1
chr7	330751	330759	chr7_330751_330759_+	2. OR;PBXO	+	2. OR;PBXO	33.143	2815.18	1106.43	32.5848	480.329	4.14e-05	GTTACCCT	0
chr10	292817	292825	chr10_292817_292825_+	2. OR;PBXO	+	2. OR;PBXO	50.5867	2624.53	448.643	2.28926	398.764	0.000324	GCTACCCT	1
chr4	405093	405101	chr4_405093_405101_-	2. OR;PBXO	-	2. OR;PBXO	55.8198	2620.93	0	80.7484	386.68	9.59e-05	GTCACCCG	1
chr7	27648	27656	chr7_27648_27656_+	2. OR;PBXO	+	2. OR;PBXO	109.895	2583.16	0.674652	25.6278	412.358	0.000662	CTGACCCG	1
chr2	786484	786492	chr2_786484_786492_-	2. OR;PBXO	-	2. OR;PBXO	61.0529	2541.43	1889.02	11.3868	279.437	0.000132	GTTACCCC	1
chr15	515653	515661	chr15_515653_515661_-	2. OR;PBXO	-	2. OR;PBXO	55.8198	2511.58	2564.35	2.5271	395.743	0.000108	GTAACCCG	1
chr2	29474	29482	chr2_29474_29482_-	2. OR;PBXO	-	2. OR;PBXO	24.4212	2432.8	22.9382	4.57852	430.484	7.13e-05	ATTACCCT	0
chr2	527028	527036	chr2_527028_527036_-	2. OR;PBXO	-	2. OR;PBXO	33.143	2406.18	384.551	68.5886	323.24	7.13e-05	ATTACCCT	0
chr15	1064515	1064523	chr15_1064515_1064523_-	2. OR;PBXO	-	2. OR;PBXO	52.3311	2382.44	1629.28	18.2249	421.421	7.13e-05	ATTACCCT	0
chr7	195380	195388	chr7_195380_195388_+	2. OR;PBXO	+	2. OR;PBXO	40.1205	2359.42	97.8245	2.82441	430.484	0.00042	CTTACCCA	1
chr16	469755	469763	chr16_469755_469763_+	2. OR;PBXO	+	2. OR;PBXO	54.0755	2318.41	187.553	174.43	418.4	0.000173	GTTACCCA	1
chr16	469752	469760	chr16_469752_469760_-	2. OR;PBXO	-	2. OR;PBXO	55.8198	2318.41	186.204	174.43	418.4	0.000198	GTAACCCT	1
chr4	240215	240223	chr4_240215_240223_+	2. OR;PBXO	+	2. OR;PBXO	54.0755	2176.32	428.404	16.0545	300.583	4.14e-05	GTTACCCT	0
chr15	519154	519162	chr15_519154_519162_-	2. OR;PBXO	-	2. OR;PBXO	43.6092	2172.36	432.452	1.90276	305.115	4.14e-05	GTTACCCT	0
chr16	466513	466521	chr16_466513_466521_-	2. OR;PBXO	-	2. OR;PBXO	38.3761	2171.28	266.487	3.59741	305.115	0.000198	GTAACCCT	1
chr13	214043	214051	chr13_214043_214051_+	2. OR;PBXO	+	2. OR;PBXO	90.7072	2134.23	499.242	59.7586	947.064	0.000108	GTAACCCG	1
chr14	210325	210333	chr14_210325_210333_+	2. OR;PBXO	+	2. OR;PBXO	43.6092	2087.47	76.2356	9.06785	336.835	0.000198	GTAACCCT	1
chr4	1496490	1496498	chr4_1496490_1496498_-	2. OR;PBXO	-	2. OR;PBXO	55.8198	2087.11	211.166	2.34872	459.182	9.59e-05	GTCACCCG	1
chr4	1454046	1454054	chr4_1454046_1454054_+	2. OR;PBXO	+	2. OR;PBXO	45.3536	2045.74	813.63	2.49737	351.939	0.000198	GTAACCCT	1
chr13	388004	388012	chr13_388004_388012_+	2. OR;PBXO	+	2. OR;PBXO	38.3761	2042.86	0	1.90276	302.094	0.000132	GTTACCCC	1
chr16	189309	189317	chr16_189309_189317_+	2. OR;PBXO	+	2. OR;PBXO	54.0755	2034.95	1293.98	14.568	430.484	1.21e-05	GTTACCCG	0
chr16	189316	189324	chr16_189316_189324_+	2. OR;PBXO	+	2. OR;PBXO	59.3086	2034.95	1293.98	14.568	433.505	0.000198	GTAACCCT	1
chr7	208202	208210	chr7_208202_208210_+	2. OR;PBXO	+	2. OR;PBXO	41.8649	2024.87	476.979	3.27037	428.973	0.000173	GTTACCCA	1
chr10	455199	455207	chr10_455199_455207_+	2. OR;PBXO	+	2. OR;PBXO	59.3086	2004.37	756.284	10.703	499.965	7.13e-05	ATTACCCT	0
chr7	875868	875876	chr7_875868_875876_-	2. OR;PBXO	-	2. OR;PBXO	38.3761	1938.18	1261.6	4.01364	478.819	4.14e-05	GTTACCCT	0
chr14	418670	418678	chr14_418670_418678_-	2. OR;PBXO	-	2. OR;PBXO	22.6768	1922.71	0	10.822	336.835	0.000132	GTTACCCC	1
chr7	642718	642726	chr7_642718_642726_-	2. OR;PBXO	-	2. OR;PBXO	55.8198	1897.53	0	2.82441	299.073	0.000264	ATCACCCT	1
chr10	369435	369443	chr10_369435_369443_+	2. OR;PBXO	+	2. OR;PBXO	57.5642	1838.18	267.162	3.98391	424.442	0.000198	GTAACCCT	1
chr2	322191	322199	chr2_322191_322199_+	2. OR;PBXO	+	2. OR;PBXO	40.1205	1828.11	190.926	4.78663	376.107	0.000173	GTTACCCA	1
chr15	251318	251326	chr15_251318_251326_+	2. OR;PBXO	+	2. OR;PBXO	57.5642	1827.39	1550.35	10.2571	504.497	0.000198	GTAACCCT	1
chr11	584274	584282	chr11_584274_584282_-	2. OR;PBXO	-	2. OR;PBXO	47.098	1816.24	0	2.9136	330.793	7.13e-05	ATTACCCT	0
chr4	1343663	1343671	chr4_1343663_1343671_-	2. OR;PBXO	-	2. OR;PBXO	45.3536	1802.93	1005.91	1.96222	394.232	0.000159	GTCACCCT	1
chr2	434201	434209	chr2_434201_434209_+	2. OR;PBXO	+	2. OR;PBXO	57.5642	1789.62	102.547	13.3788	412.358	0.000132	GTTACCCC	1
chr12	854450	854458	chr12_854450_854458_-	2. OR;PBXO	-	2. OR;PBXO	52.3311	1723.07	348.795	21.7926	320.219	5.35e-05	CTTACCCG	0
chr2	784314	784322	chr2_784314_784322_+	2. OR;PBXO	+	2. OR;PBXO	38.3761	1678.1	0	6.68939	389.701	0.000573	AATACCCG	1
chr15	21086	21094	chr15_21086_21094_+	2. OR;PBXO	+	2. OR;PBXO	55.8198	1671.99	0	3.09199	537.727	0.000198	GTAACCCT	1
chr1	106088	106096	chr1_106088_106096_-	2. OR;PBXO	-	2. OR;PBXO	52.3311	1664.43	0	3.56768	286.989	7.13e-05	ATTACCCT	0
chr13	818710	818718	chr13_818710_818718_-	2. OR;PBXO	-	2. OR;PBXO	17.4437	1616.59	139.653	7.61104	561.894	0.000364	GTGACCCG	1
chr5	558636	558644	chr5_558636_558644_+	2. OR;PBXO	+	2. OR;PBXO	45.3536	1584.93	1283.19	2.34872	391.211	4.14e-05	GTTACCCT	0
chr2	728256	728264	chr2_728256_728264_+	2. OR;PBXO	+	2. OR;PBXO	43.6092	1551.84	0	43.9419	329.282	0.000386	GGTACCCG	1
chr7	166641	166649	chr7_166641_166649_-	2. OR;PBXO	-	2. OR;PBXO	45.3536	1531.7	93.1019	5.79747	438.036	7.13e-05	ATTACCCT	0
chr7	13234	13242	chr7_13234_13242_+	2. OR;PBXO	+	2. OR;PBXO	36.6318	1504.36	246.248	3.18118	311.157	2.67e-05	ATTACCCG	0
chr5	427652	427660	chr5_427652_427660_-	2. OR;PBXO	-	2. OR;PBXO	54.0755	1502.2	0	3.47849	416.889	0.000237	ATTACCCC	1
chr4	630427	630435	chr4_630427_630435_+	2. OR;PBXO	+	2. OR;PBXO	52.3311	1484.57	389.274	3.89471	293.031	9.59e-05	GTCACCCG	1
chr15	8020	8028	chr15_8020_8028_-	2. OR;PBXO	-	2. OR;PBXO	52.3311	1449.68	559.286	1.99195	395.743	7.13e-05	ATTACCCT	0
chr6	110052	110060	chr6_110052_110060_-	2. OR;PBXO	-	2. OR;PBXO	52.3311	1447.52	1.3493	14.5383	475.798	4.14e-05	GTTACCCT	0
chr12	933771	933779	chr12_933771_933779_+	2. OR;PBXO	+	2. OR;PBXO	55.8198	1438.53	2094.12	12.695	385.17	8.6e-05	CTTACCCT	0
chr8	163020	163028	chr8_163020_163028_+	2. OR;PBXO	+	2. OR;PBXO	40.1205	1432.41	78.9342	3.74606	451.63	0.00042	CTTACCCA	1
chr4	1312702	1312710	chr4_1312702_1312710_+	2. OR;PBXO	+	2. OR;PBXO	54.0755	1404.71	0	2.58657	448.609	0.00043	CCTACCCG	1
chr14	134246	134254	chr14_134246_134254_+	2. OR;PBXO	+	2. OR;PBXO	54.0755	1400.4	1018.72	2.82441	371.575	0.000546	GTGACCCT	1
chr2	447120	447128	chr2_447120_447128_+	2. OR;PBXO	+	2. OR;PBXO	47.098	1395	10.7944	2.40818	401.785	0.000324	GCTACCCT	1
chr15	504889	504897	chr15_504889_504897_-	2. OR;PBXO	-	2. OR;PBXO	41.8649	1389.61	10.1198	6.2137	433.505	0.000282	ATTACCCA	1
chr4	1042139	1042147	chr4_1042139_1042147_-	2. OR;PBXO	-	2. OR;PBXO	41.8649	1365.14	495.869	7.25428	389.701	0.000173	GTTACCCA	1
chr5	438462	438470	chr5_438462_438470_+	2. OR;PBXO	+	2. OR;PBXO	48.8423	1364.06	0	3.00279	330.793	7.13e-05	ATTACCCT	0
chr13	741419	741427	chr13_741419_741427_+	2. OR;PBXO	+	2. OR;PBXO	36.6318	1338.16	33.7326	3.59741	300.583	5.35e-05	CTTACCCG	0
chr9	429555	429563	chr9_429555_429563_-	2. OR;PBXO	-	2. OR;PBXO	43.6092	1330.61	0.674652	7.81916	512.049	7.13e-05	ATTACCCT	0
chr15	936282	936290	chr15_936282_936290_-	2. OR;PBXO	-	2. OR;PBXO	45.3536	1315.5	796.089	2.11088	415.379	0.000159	ATAACCCG	1
chr13	300621	300629	chr13_300621_300629_-	2. OR;PBXO	-	2. OR;PBXO	54.0755	1309.03	1035.59	3.89471	416.889	0.000376	CTCACCCT	1
chr12	187413	187421	chr12_187413_187421_-	2. OR;PBXO	-	2. OR;PBXO	38.3761	1303.99	80.9582	7.19482	404.806	0.000354	TTTACCCT	1
chr13	71232	71240	chr13_71232_71240_+	2. OR;PBXO	+	2. OR;PBXO	34.8874	1301.83	465.51	3.00279	415.379	0.000132	GTTACCCC	1
chr2	178379	178387	chr2_178379_178387_+	2. OR;PBXO	+	2. OR;PBXO	45.3536	1289.96	985.666	2.43791	321.73	0.000405	GTTGCCCG	1
chr4	1365852	1365860	chr4_1365852_1365860_-	2. OR;PBXO	-	2. OR;PBXO	33.143	1279.89	202.395	4.63798	335.324	1.21e-05	GTTACCCG	0
chr10	455343	455351	chr10_455343_455351_-	2. OR;PBXO	-	2. OR;PBXO	41.8649	1279.17	352.168	5.47044	471.266	4.14e-05	GTTACCCT	0
chr15	987858	987866	chr15_987858_987866_+	2. OR;PBXO	+	2. OR;PBXO	36.6318	1275.93	0	1.87303	382.149	0.000173	GTTACCCA	1
chr15	798167	798175	chr15_798167_798175_+	2. OR;PBXO	+	2. OR;PBXO	59.3086	1270.18	95.1259	1.75411	291.52	0.000173	GTTACCCA	1
chr2	160145	160153	chr2_160145_160153_-	2. OR;PBXO	-	2. OR;PBXO	29.6543	1259.03	478.328	3.47849	359.492	1.21e-05	GTTACCCG	0
chr4	639458	639466	chr4_639458_639466_-	2. OR;PBXO	-	2. OR;PBXO	34.8874	1255.43	84.3314	3.89471	296.052	1.21e-05	GTTACCCG	0
chr11	567700	567708	chr11_567700_567708_+	2. OR;PBXO	+	2. OR;PBXO	106.407	1255.43	1.3493	36.5687	938.001	0.000108	GTAACCCG	1
chr13	810395	810403	chr13_810395_810403_-	2. OR;PBXO	-	2. OR;PBXO	45.3536	1255.07	155.845	1.87303	542.258	0.000405	GTTGCCCG	1
chr12	645387	645395	chr12_645387_645395_+	2. OR;PBXO	+	2. OR;PBXO	50.5867	1253.99	221.96	7.61104	383.659	4.14e-05	GTTACCCT	0
chr8	261992	262000	chr8_261992_262000_-	2. OR;PBXO	-	2. OR;PBXO	38.3761	1241.04	612.584	4.99475	395.743	7.13e-05	ATTACCCT	0
chr4	1226659	1226667	chr4_1226659_1226667_-	2. OR;PBXO	-	2. OR;PBXO	20.9324	1234.92	2.02395	32.8524	361.002	4.14e-05	GTTACCCT	0
chr8	47046	47054	chr8_47046_47054_-	2. OR;PBXO	-	2. OR;PBXO	55.8198	1227.73	890.54	3.41902	679.711	4.14e-05	GTTACCCT	0
chr4	1351973	1351981	chr4_1351973_1351981_+	2. OR;PBXO	+	2. OR;PBXO	47.098	1224.49	1070.67	3.09199	542.258	0.00012	ATCACCCG	1
chr11	608545	608553	chr11_608545_608553_-	2. OR;PBXO	-	2. OR;PBXO	22.6768	1222.69	14.1677	28.8685	359.492	0.000237	ATTACCCC	1
chr7	165749	165757	chr7_165749_165757_+	2. OR;PBXO	+	2. OR;PBXO	27.9099	1219.46	527.578	2.94333	438.036	0.000324	GCTACCCT	1
chr4	1277131	1277139	chr4_1277131_1277139_-	2. OR;PBXO	-	2. OR;PBXO	52.3311	1218.74	0	3.24064	282.458	7.13e-05	ATTACCCT	0
chr10	84553	84561	chr10_84553_84561_+	2. OR;PBXO	+	2. OR;PBXO	50.5867	1212.62	0	2.25953	397.253	0.000198	GTAACCCT	1
chr2	204073	204081	chr2_204073_204081_-	2. OR;PBXO	-	2. OR;PBXO	47.098	1212.62	792.041	2.25953	450.12	0.000108	GTAACCCG	1
chr2	204076	204084	chr2_204076_204084_+	2. OR;PBXO	+	2. OR;PBXO	47.098	1212.62	792.041	2.25953	456.162	0.000173	GTTACCCA	1
chr12	49753	49761	chr12_49753_49761_+	2. OR;PBXO	+	2. OR;PBXO	33.143	1211.9	68.8145	8.71108	457.672	0.000534	ATTGCCCG	1
chr11	503029	503037	chr11_503029_503037_+	2. OR;PBXO	+	2. OR;PBXO	40.1205	1211.54	394.671	1.87303	444.078	0.000282	ATTACCCA	1
chr7	444060	444068	chr7_444060_444068_-	2. OR;PBXO	-	2. OR;PBXO	62.7973	1211.18	767.079	2.82441	427.463	0.000849	ATTGCCCT	1
chr7	978425	978433	chr7_978425_978433_+	2. OR;PBXO	+	2. OR;PBXO	48.8423	1203.99	1275.77	4.42987	373.086	4.14e-05	GTTACCCT	0
chr4	1283584	1283592	chr4_1283584_1283592_+	2. OR;PBXO	+	2. OR;PBXO	54.0755	1200.39	17.5409	1.8433	351.939	0.000364	GTGACCCG	1
chr12	187433	187441	chr12_187433_187441_+	2. OR;PBXO	+	2. OR;PBXO	47.098	1199.67	182.831	7.19482	376.107	0.000159	GTCACCCT	1
chr10	569195	569203	chr10_569195_569203_+	2. OR;PBXO	+	2. OR;PBXO	59.3086	1188.52	0	2.08114	400.274	0.00042	CTTACCCA	1
chr12	405664	405672	chr12_405664_405672_-	2. OR;PBXO	-	2. OR;PBXO	43.6092	1187.44	0	1.75411	336.835	0.000724	CTTCCCCG	1
chr4	1015036	1015044	chr4_1015036_1015044_+	2. OR;PBXO	+	2. OR;PBXO	36.6318	1184.56	971.498	10.1381	424.442	0.000237	ATTACCCC	1
chr14	541989	541997	chr14_541989_541997_+	2. OR;PBXO	+	2. OR;PBXO	57.5642	1176.65	494.52	18.8492	903.26	0.000498	ATGACCCG	1
chr15	915735	915743	chr15_915735_915743_-	2. OR;PBXO	-	2. OR;PBXO	61.0529	1168.02	264.463	5.44071	460.693	0.000249	CTAACCCG	1
chr14	145907	145915	chr14_145907_145915_-	2. OR;PBXO	-	2. OR;PBXO	47.098	1165.14	1322.99	5.08394	567.936	7.13e-05	ATTACCCT	0
chr16	647179	647187	chr16_647179_647187_+	2. OR;PBXO	+	2. OR;PBXO	59.3086	1160.82	0	49.2339	409.337	0.000213	TTTACCCG	1
chr15	22322	22330	chr15_22322_22330_+	2. OR;PBXO	+	2. OR;PBXO	52.3311	1159.74	0	1.81357	330.793	0.000198	GTAACCCT	1
chr4	774415	774423	chr4_774415_774423_-	2. OR;PBXO	-	2. OR;PBXO	31.3986	1158.66	279.306	2.88387	341.366	4.14e-05	GTTACCCT	0
chr10	378616	378624	chr10_378616_378624_-	2. OR;PBXO	-	2. OR;PBXO	69.7748	1158.3	0	8.62189	445.588	0.000573	AATACCCG	1
chr2	775011	775019	chr2_775011_775019_+	2. OR;PBXO	+	2. OR;PBXO	59.3086	1156.51	0	7.84889	616.271	0.00043	CCTACCCG	1
chr4	1502289	1502297	chr4_1502289_1502297_-	2. OR;PBXO	-	2. OR;PBXO	34.8874	1143.92	0	2.6163	359.492	4.14e-05	GTTACCCT	0
chr5	539656	539664	chr5_539656_539664_-	2. OR;PBXO	-	2. OR;PBXO	43.6092	1142.12	0	2.37845	428.973	0.000159	GTCACCCT	1
chr2	620685	620693	chr2_620685_620693_+	2. OR;PBXO	+	2. OR;PBXO	34.8874	1136.36	0	9.30569	368.554	7.13e-05	ATTACCCT	0
chr14	398030	398038	chr14_398030_398038_-	2. OR;PBXO	-	2. OR;PBXO	61.0529	1131.32	80.9582	2.94333	347.408	7.13e-05	ATTACCCT	0
chr10	681372	681380	chr10_681372_681380_-	2. OR;PBXO	-	2. OR;PBXO	57.5642	1128.09	1045.04	9.30569	471.266	8.6e-05	CTTACCCT	0
chr13	439301	439309	chr13_439301_439309_-	2. OR;PBXO	-	2. OR;PBXO	47.098	1119.09	158.543	2.5271	339.855	7.13e-05	ATTACCCT	0
chr2	159877	159885	chr2_159877_159885_+	2. OR;PBXO	+	2. OR;PBXO	41.8649	1111.18	0	3.53795	359.492	0.000376	CTCACCCT	1
chr10	623602	623610	chr10_623602_623610_-	2. OR;PBXO	-	2. OR;PBXO	59.3086	1109.38	468.883	2.37845	442.567	0.000173	GTTACCCA	1
chr10	623605	623613	chr10_623605_623613_+	2. OR;PBXO	+	2. OR;PBXO	57.5642	1107.58	468.883	2.37845	442.567	0.000783	GTAACCCA	2
chr16	894145	894153	chr16_894145_894153_+	2. OR;PBXO	+	2. OR;PBXO	36.6318	1107.22	46.551	2.88387	348.918	8.6e-05	CTTACCCT	0
chr3	305353	305361	chr3_305353_305361_-	2. OR;PBXO	-	2. OR;PBXO	34.8874	1106.14	1637.38	2.79468	348.918	0.000108	GTAACCCG	1
chr16	226971	226979	chr16_226971_226979_+	2. OR;PBXO	+	2. OR;PBXO	50.5867	1101.83	116.04	3.71633	353.45	0.000108	GTAACCCG	1
chr14	199810	199818	chr14_199810_199818_-	2. OR;PBXO	-	2. OR;PBXO	36.6318	1094.27	793.39	1.93249	424.442	7.13e-05	ATTACCCT	0
chr12	1059582	1059590	chr12_1059582_1059590_-	2. OR;PBXO	-	2. OR;PBXO	26.1655	1086	0	1.90276	321.73	0.000198	GTAACCCT	1
chr2	594012	594020	chr2_594012_594020_+	2. OR;PBXO	+	2. OR;PBXO	47.098	1086	694.891	2.64603	456.162	9.59e-05	GTCACCCG	1
chr5	518858	518866	chr5_518858_518866_-	2. OR;PBXO	-	2. OR;PBXO	36.6318	1076.29	0	2.73522	465.224	0.000173	GTTACCCA	1
chr10	569189	569197	chr10_569189_569197_+	2. OR;PBXO	+	2. OR;PBXO	59.3086	1074.85	0	2.08114	403.295	8.6e-05	CTTACCCT	0
chr15	702608	702616	chr15_702608_702616_+	2. OR;PBXO	+	2. OR;PBXO	41.8649	1074.49	462.136	1.96222	362.512	4.14e-05	GTTACCCT	0
chr7	969624	969632	chr7_969624_969632_-	2. OR;PBXO	-	2. OR;PBXO	36.6318	1068.37	287.402	5.58936	409.337	0.00042	CTTACCCA	1
chr2	288215	288223	chr2_288215_288223_-	2. OR;PBXO	-	2. OR;PBXO	29.6543	1059.74	0	2.40818	394.232	0.000546	GTGACCCT	1
chr11	228004	228012	chr11_228004_228012_-	2. OR;PBXO	-	2. OR;PBXO	45.3536	1058.3	51.2735	1.75411	421.421	0.000386	GGTACCCG	1
chr13	256208	256216	chr13_256208_256216_-	2. OR;PBXO	-	2. OR;PBXO	55.8198	1043.91	0	2.28926	431.994	0.000312	ATAACCCT	1
chr12	94936	94944	chr12_94936_94944_+	2. OR;PBXO	+	2. OR;PBXO	52.3311	1042.11	11.4691	2.64603	439.546	0.00042	CTTACCCA	1
chr8	313517	313525	chr8_313517_313525_+	2. OR;PBXO	+	2. OR;PBXO	34.8874	1041.03	462.811	5.11367	534.706	4.14e-05	GTTACCCT	0
chr16	755166	755174	chr16_755166_755174_+	2. OR;PBXO	+	2. OR;PBXO	40.1205	1037.44	180.132	4.60825	357.981	0.000282	ATTACCCA	1
chr16	755187	755195	chr16_755187_755195_+	2. OR;PBXO	+	2. OR;PBXO	27.9099	1035.64	180.132	4.60825	412.358	0.000159	GTCACCCT	1
chr4	1174373	1174381	chr4_1174373_1174381_-	2. OR;PBXO	-	2. OR;PBXO	55.8198	1034.2	63.4172	42.931	519.601	0.000132	GTTACCCC	1
chr11	127163	127171	chr11_127163_127171_+	2. OR;PBXO	+	2. OR;PBXO	50.5867	1017.29	580.2	17.6005	351.939	0.000198	GTAACCCT	1
chr13	193014	193022	chr13_193014_193022_+	2. OR;PBXO	+	2. OR;PBXO	38.3761	1016.93	345.422	5.35152	385.17	2.67e-05	ATTACCCG	0
chr5	123822	123830	chr5_123822_123830_+	2. OR;PBXO	+	2. OR;PBXO	48.8423	1009.02	290.775	3.03253	401.785	0.000294	ACTACCCG	1
chr16	174376	174384	chr16_174376_174384_+	2. OR;PBXO	+	2. OR;PBXO	36.6318	1005.78	433.126	2.20007	200.892	0.000173	GTTACCCA	1
chr4	1465095	1465103	chr4_1465095_1465103_-	2. OR;PBXO	-	2. OR;PBXO	43.6092	1005.78	283.354	2.67576	453.141	4.14e-05	GTTACCCT	0
chr2	132667	132675	chr2_132667_132675_-	2. OR;PBXO	-	2. OR;PBXO	54.0755	1000.03	162.591	1.75411	359.492	0.00042	CTTACCCA	1
chr5	437788	437796	chr5_437788_437796_-	2. OR;PBXO	-	2. OR;PBXO	54.0755	997.868	102.547	4.16229	344.387	0.000634	GATACCCT	1
chr10	609898	609906	chr10_609898_609906_-	2. OR;PBXO	-	2. OR;PBXO	47.098	993.552	269.186	1.87303	590.593	0.000183	GCTACCCG	1
chr15	637031	637039	chr15_637031_637039_-	2. OR;PBXO	-	2. OR;PBXO	48.8423	987.796	469.557	2.46764	270.374	0.000498	ATGACCCG	1
chr12	252060	252068	chr12_252060_252068_+	2. OR;PBXO	+	2. OR;PBXO	52.3311	986.357	0.674652	1.75411	291.52	9.59e-05	GTCACCCG	1
chr13	828386	828394	chr13_828386_828394_+	2. OR;PBXO	+	2. OR;PBXO	41.8649	978.443	255.018	2.55684	403.295	0.000364	GTGACCCG	1
chr11	665264	665272	chr11_665264_665272_-	2. OR;PBXO	-	2. OR;PBXO	47.098	977.724	922.249	2.55684	462.203	0.000198	GTAACCCT	1
chr16	51297	51305	chr16_51297_51305_-	2. OR;PBXO	-	2. OR;PBXO	61.0529	975.925	0	4.13256	342.876	0.000173	GTTACCCA	1
chr14	497734	497742	chr14_497734_497742_-	2. OR;PBXO	-	2. OR;PBXO	50.5867	973.767	1399.9	3.56768	386.68	0.000364	GTGACCCG	1
chr15	292332	292340	chr15_292332_292340_-	2. OR;PBXO	-	2. OR;PBXO	15.6993	970.889	0	10.703	336.835	0.000264	ATCACCCT	1
chr4	730366	730374	chr4_730366_730374_+	2. OR;PBXO	+	2. OR;PBXO	20.9324	969.09	0	2.6163	326.261	0.000486	GTTAACCG	1
chr10	574797	574805	chr10_574797_574805_+	2. OR;PBXO	+	2. OR;PBXO	36.6318	963.695	496.544	1.96222	326.261	0.000159	GTCACCCT	1
chr2	277038	277046	chr2_277038_277046_+	2. OR;PBXO	+	2. OR;PBXO	55.8198	957.939	151.122	1.78384	445.588	8.6e-05	CTTACCCT	0
chr15	452924	452932	chr15_452924_452932_-	2. OR;PBXO	-	2. OR;PBXO	47.098	956.86	1043.69	1.8433	412.358	0.00012	ATCACCCG	1
chr9	254580	254588	chr9_254580_254588_+	2. OR;PBXO	+	2. OR;PBXO	57.5642	955.061	790.017	7.64077	468.245	0.000354	CTTACCCC	1
chr4	366867	366875	chr4_366867_366875_-	2. OR;PBXO	-	2. OR;PBXO	41.8649	949.665	34.4072	3.44875	447.099	0.00051	AGTACCCG	1
chr14	754429	754437	chr14_754429_754437_+	2. OR;PBXO	+	2. OR;PBXO	55.8198	949.306	271.21	1.90276	314.177	4.14e-05	GTTACCCT	0
chr3	285004	285012	chr3_285004_285012_+	2. OR;PBXO	+	2. OR;PBXO	43.6092	945.709	233.429	2.20007	374.596	0.000364	GTGACCCG	1
chr7	889307	889315	chr7_889307_889315_+	2. OR;PBXO	+	2. OR;PBXO	50.5867	938.874	0	3.00279	365.533	7.13e-05	ATTACCCT	0
chr14	107568	107576	chr14_107568_107576_-	2. OR;PBXO	-	2. OR;PBXO	22.6768	937.075	117.389	12.5463	512.049	0.000534	ATTGCCCG	1
chr4	644043	644051	chr4_644043_644051_-	2. OR;PBXO	-	2. OR;PBXO	41.8649	936.715	572.105	16.6194	264.332	0.000534	ATTGCCCG	1
chr6	233848	233856	chr6_233848_233856_-	2. OR;PBXO	-	2. OR;PBXO	26.1655	934.917	1.3493	14.5086	317.198	0.000312	ATAACCCT	1
chr12	720359	720367	chr12_720359_720367_-	2. OR;PBXO	-	2. OR;PBXO	48.8423	922.327	0	1.75411	370.065	4.14e-05	GTTACCCT	0
chr16	152031	152039	chr16_152031_152039_-	2. OR;PBXO	-	2. OR;PBXO	101.173	905.06	0	2.55684	433.505	2.67e-05	ATTACCCG	0
chr11	223648	223656	chr11_223648_223656_+	2. OR;PBXO	+	2. OR;PBXO	59.3086	901.822	513.41	2.34872	563.405	0.000634	GATACCCT	1
chr12	741328	741336	chr12_741328_741336_+	2. OR;PBXO	+	2. OR;PBXO	52.3311	898.585	330.579	2.17034	486.371	4.14e-05	GTTACCCT	0
chr4	951793	951801	chr4_951793_951801_+	2. OR;PBXO	+	2. OR;PBXO	48.8423	896.786	159.218	1.78384	359.492	0.00051	AGTACCCG	1
chr4	359333	359341	chr4_359333_359341_+	2. OR;PBXO	+	2. OR;PBXO	45.3536	895.707	1009.28	3.74606	421.421	7.13e-05	ATTACCCT	0
chr15	331781	331789	chr15_331781_331789_-	2. OR;PBXO	-	2. OR;PBXO	26.1655	879.879	108.619	2.11088	373.086	7.13e-05	ATTACCCT	0
chr11	608566	608574	chr11_608566_608574_+	2. OR;PBXO	+	2. OR;PBXO	19.1881	879.52	14.1677	28.8685	317.198	0.000354	TTTACCCT	1
chr15	527611	527619	chr15_527611_527619_+	2. OR;PBXO	+	2. OR;PBXO	62.7973	865.131	141.677	1.99195	441.057	8.6e-05	CTTACCCT	0
chr16	768745	768753	chr16_768745_768753_+	2. OR;PBXO	+	2. OR;PBXO	36.6318	864.052	105.246	2.14061	545.279	0.000198	GTAACCCT	1
chr16	864802	864810	chr16_864802_864810_+	2. OR;PBXO	+	2. OR;PBXO	52.3311	846.425	0	3.44875	422.931	7.13e-05	ATTACCCT	0
chr12	723609	723617	chr12_723609_723617_+	2. OR;PBXO	+	2. OR;PBXO	6.97748	844.986	0	2.64603	311.157	0.000457	GATACCCG	1
chr2	458825	458833	chr2_458825_458833_-	2. OR;PBXO	-	2. OR;PBXO	43.6092	840.31	0	2.25953	466.735	7.13e-05	ATTACCCT	0
chr14	629725	629733	chr14_629725_629733_-	2. OR;PBXO	-	2. OR;PBXO	57.5642	839.95	428.404	2.40818	444.078	0.000132	GTTACCCC	1
chr2	661724	661732	chr2_661724_661732_-	2. OR;PBXO	-	2. OR;PBXO	40.1205	837.073	13.493	3.03253	354.96	0.000183	GCTACCCG	1
chr7	1039909	1039917	chr7_1039909_1039917_-	2. OR;PBXO	-	2. OR;PBXO	43.6092	832.756	629.45	8.02727	314.177	0.000312	ATAACCCT	1
chr8	393409	393417	chr8_393409_393417_+	2. OR;PBXO	+	2. OR;PBXO	43.6092	827	0	45.5771	450.12	7.13e-05	ATTACCCT	0
chr10	624568	624576	chr10_624568_624576_+	2. OR;PBXO	+	2. OR;PBXO	52.3311	825.202	1095.63	10.6138	548.3	8.6e-05	CTTACCCT	0
chr5	193382	193390	chr5_193382_193390_-	2. OR;PBXO	-	2. OR;PBXO	57.5642	822.684	0	3.6866	329.282	0.000264	ATCACCCT	1
chr12	823077	823085	chr12_823077_823085_+	2. OR;PBXO	+	2. OR;PBXO	34.8874	813.691	470.907	1.93249	299.073	0.000573	GGTACCCT	1
chr4	34712	34720	chr4_34712_34720_-	2. OR;PBXO	-	2. OR;PBXO	61.0529	803.618	202.395	1.96222	513.559	0.000183	GCTACCCG	1
chr4	68888	68896	chr4_68888_68896_+	2. OR;PBXO	+	2. OR;PBXO	31.3986	789.589	472.256	90.2028	460.693	9.59e-05	GTCACCCG	1
chr10	194279	194287	chr10_194279_194287_-	2. OR;PBXO	-	2. OR;PBXO	38.3761	784.913	0	1.87303	471.266	0.000282	ATTACCCA	1
chr12	599624	599632	chr12_599624_599632_+	2. OR;PBXO	+	2. OR;PBXO	27.9099	784.193	0	2.46764	255.269	0.000364	GTGACCCG	1
chr4	1045247	1045255	chr4_1045247_1045255_+	2. OR;PBXO	+	2. OR;PBXO	22.6768	783.474	0	7.13535	268.863	0.000282	ATTACCCA	1
chr16	887959	887967	chr16_887959_887967_+	2. OR;PBXO	+	2. OR;PBXO	27.9099	780.596	0	12.5463	350.429	0.000386	GGTACCCG	1
chr11	160085	160093	chr11_160085_160093_+	2. OR;PBXO	+	2. OR;PBXO	43.6092	779.517	0	1.8433	362.512	0.000354	TTTACCCT	1
chr15	637007	637015	chr15_637007_637015_-	2. OR;PBXO	-	2. OR;PBXO	41.8649	777.718	0	2.46764	246.206	8.6e-05	CTTACCCT	0
chr15	641517	641525	chr15_641517_641525_-	2. OR;PBXO	-	2. OR;PBXO	57.5642	775.2	439.873	2.25953	419.91	2.67e-05	ATTACCCG	0
chr16	525342	525350	chr16_525342_525350_-	2. OR;PBXO	-	2. OR;PBXO	47.098	771.243	158.543	6.95697	332.303	0.000132	GTTACCCC	1
chr15	349713	349721	chr15_349713_349721_-	2. OR;PBXO	-	2. OR;PBXO	34.8874	769.085	0	2.40818	350.429	0.000364	GTGACCCG	1
chr11	483279	483287	chr11_483279_483287_-	2. OR;PBXO	-	2. OR;PBXO	31.3986	768.366	230.056	51.107	489.392	0.000457	GATACCCG	1
chr15	755189	755197	chr15_755189_755197_-	2. OR;PBXO	-	2. OR;PBXO	27.9099	768.006	0	9.95976	354.96	0.000704	GCCACCCG	2
chr16	451554	451562	chr16_451554_451562_-	2. OR;PBXO	-	2. OR;PBXO	41.8649	766.927	33.7326	9.00838	217.507	7.13e-05	ATTACCCT	0
chr14	321826	321834	chr14_321826_321834_-	2. OR;PBXO	-	2. OR;PBXO	41.8649	766.567	0	12.9328	377.617	0.000312	ATAACCCT	1
chr14	321842	321850	chr14_321842_321850_-	2. OR;PBXO	-	2. OR;PBXO	38.3761	766.207	0	12.9328	377.617	0.000908	CTTAACCG	1
chr2	166470	166478	chr2_166470_166478_+	2. OR;PBXO	+	2. OR;PBXO	47.098	765.128	190.252	2.43791	300.583	7.13e-05	ATTACCCT	0
chr5	256221	256229	chr5_256221_256229_+	2. OR;PBXO	+	2. OR;PBXO	33.143	757.574	0	5.05421	223.549	0.000312	ATAACCCT	1
chr11	204771	204779	chr11_204771_204779_+	2. OR;PBXO	+	2. OR;PBXO	34.8874	746.423	89.7287	4.19202	389.701	0.000198	GTAACCCT	1
chr12	659729	659737	chr12_659729_659737_-	2. OR;PBXO	-	2. OR;PBXO	69.7748	745.703	0	2.05141	407.827	7.13e-05	ATTACCCT	0
chr4	1165998	1166006	chr4_1165998_1166006_+	2. OR;PBXO	+	2. OR;PBXO	55.8198	741.746	0.674652	7.34347	438.036	0.000198	GTAACCCT	1
chr16	647190	647198	chr16_647190_647198_+	2. OR;PBXO	+	2. OR;PBXO	50.5867	741.387	0	49.2339	425.952	0.000741	GTTAACCT	1
chr8	99016	99024	chr8_99016_99024_-	2. OR;PBXO	-	2. OR;PBXO	34.8874	727.357	0	6.89751	427.463	0.000662	CTGACCCG	1
chr15	303284	303292	chr15_303284_303292_-	2. OR;PBXO	-	2. OR;PBXO	33.143	720.163	0	4.54879	312.667	0.000805	CATACCCG	1
chr5	271641	271649	chr5_271641_271649_-	2. OR;PBXO	-	2. OR;PBXO	34.8874	719.444	25.6368	83.4836	498.455	0.000686	GTAACCCC	2
chr5	271644	271652	chr5_271644_271652_+	2. OR;PBXO	+	2. OR;PBXO	31.3986	719.444	25.6368	83.4836	498.455	0.000132	GTTACCCC	1
chr7	526761	526769	chr7_526761_526769_-	2. OR;PBXO	-	2. OR;PBXO	13.955	718.005	0	2.25953	311.157	0.000573	AATACCCG	1
chr13	119453	119461	chr13_119453_119461_+	2. OR;PBXO	+	2. OR;PBXO	31.3986	703.975	0	2.73522	345.897	0.00012	ATCACCCG	1
chr4	121980	121988	chr4_121980_121988_-	2. OR;PBXO	-	2. OR;PBXO	50.5867	703.256	481.701	2.43791	353.45	0.000249	CTAACCCG	1
chr12	86019	86027	chr12_86019_86027_-	2. OR;PBXO	-	2. OR;PBXO	47.098	702.177	0	3.32983	498.455	0.000312	ATAACCCT	1
chr16	542190	542198	chr16_542190_542198_+	2. OR;PBXO	+	2. OR;PBXO	85.4741	699.299	255.018	21.7034	383.659	2.67e-05	ATTACCCG	0
chr2	389946	389954	chr2_389946_389954_+	2. OR;PBXO	+	2. OR;PBXO	40.1205	698.58	563.334	3.86498	312.667	4.14e-05	GTTACCCT	0
chr10	555039	555047	chr10_555039_555047_-	2. OR;PBXO	-	2. OR;PBXO	24.4212	691.385	0	12.2788	416.889	0.000354	TTTACCCT	1
chr3	197346	197354	chr3_197346_197354_-	2. OR;PBXO	-	2. OR;PBXO	17.4437	689.227	557.937	4.22175	456.162	8.6e-05	CTTACCCT	0
chr12	647147	647155	chr12_647147_647155_+	2. OR;PBXO	+	2. OR;PBXO	50.5867	686.709	39.1298	3.12172	376.107	0.000364	GTGACCCG	1
chr14	258296	258304	chr14_258296_258304_-	2. OR;PBXO	-	2. OR;PBXO	111.64	686.349	847.362	246.408	450.12	0.000132	GTTACCCC	1
chr14	258299	258307	chr14_258299_258307_+	2. OR;PBXO	+	2. OR;PBXO	109.895	685.27	847.362	246.408	444.078	0.000783	GTAACCCA	2
chr4	258714	258722	chr4_258714_258722_-	2. OR;PBXO	-	2. OR;PBXO	102.918	685.27	0	15.9654	477.308	5.35e-05	CTTACCCG	0
chr14	255929	255937	chr14_255929_255937_-	2. OR;PBXO	-	2. OR;PBXO	38.3761	684.91	184.18	2.31899	442.567	0.000198	GTAACCCT	1
chr10	563155	563163	chr10_563155_563163_+	2. OR;PBXO	+	2. OR;PBXO	31.3986	684.191	323.833	3.21091	323.24	0.000159	GTCACCCT	1
chr14	255932	255940	chr14_255932_255940_+	2. OR;PBXO	+	2. OR;PBXO	34.8874	684.191	184.18	2.31899	460.693	0.000173	GTTACCCA	1
chr4	1067414	1067422	chr4_1067414_1067422_-	2. OR;PBXO	-	2. OR;PBXO	45.3536	682.392	563.334	5.64882	321.73	8.6e-05	CTTACCCT	0
chr5	294685	294693	chr5_294685_294693_-	2. OR;PBXO	-	2. OR;PBXO	68.0304	679.514	198.348	4.96502	447.099	0.000457	GATACCCG	1
chr10	684672	684680	chr10_684672_684680_-	2. OR;PBXO	-	2. OR;PBXO	43.6092	676.996	217.238	2.02168	462.203	2.67e-05	ATTACCCG	0
chr15	892568	892576	chr15_892568_892576_-	2. OR;PBXO	-	2. OR;PBXO	55.8198	664.766	37.1058	3.18118	253.759	0.000132	GTTACCCC	1
chr4	499594	499602	chr4_499594_499602_-	2. OR;PBXO	-	2. OR;PBXO	52.3311	664.406	0	2.08114	364.023	0.000597	GTTCCCCT	1
chr13	147654	147662	chr13_147654_147662_+	2. OR;PBXO	+	2. OR;PBXO	87.2185	662.967	169.338	2.43791	388.19	7.13e-05	ATTACCCT	0
chr9	253754	253762	chr9_253754_253762_+	2. OR;PBXO	+	2. OR;PBXO	50.5867	661.888	0	4.96502	389.701	0.000724	CTTGCCCG	1
chr4	1494146	1494154	chr4_1494146_1494154_-	2. OR;PBXO	-	2. OR;PBXO	41.8649	661.888	1332.44	9.00838	341.366	5.35e-05	CTTACCCG	0
chr10	177554	177562	chr10_177554_177562_-	2. OR;PBXO	-	2. OR;PBXO	34.8874	659.73	0	3.3001	318.709	8.6e-05	CTTACCCT	0
chr5	523032	523040	chr5_523032_523040_-	2. OR;PBXO	-	2. OR;PBXO	22.6768	652.895	0	9.30569	235.633	4.14e-05	GTTACCCT	0
chr13	71251	71259	chr13_71251_71259_-	2. OR;PBXO	-	2. OR;PBXO	54.0755	652.535	465.51	3.00279	418.4	0.000405	GTTGCCCG	1
chr16	113173	113181	chr16_113173_113181_-	2. OR;PBXO	-	2. OR;PBXO	54.0755	641.744	534.324	3.62714	528.664	0.000132	GTTACCCC	1
chr13	46864	46872	chr13_46864_46872_+	2. OR;PBXO	+	2. OR;PBXO	50.5867	641.744	1177.27	2.08114	515.07	5.35e-05	CTTACCCG	0
chr4	1129438	1129446	chr4_1129438_1129446_+	2. OR;PBXO	+	2. OR;PBXO	29.6543	639.585	0	14.5086	291.52	0.000573	AATACCCG	1
chr2	396916	396924	chr2_396916_396924_-	2. OR;PBXO	-	2. OR;PBXO	59.3086	639.226	0	2.31899	386.68	0.000324	GCTACCCT	1
chr12	18445	18453	chr12_18445_18453_+	2. OR;PBXO	+	2. OR;PBXO	41.8649	637.067	379.154	1.81357	333.814	8.6e-05	CTTACCCT	0
chr2	311631	311639	chr2_311631_311639_-	2. OR;PBXO	-	2. OR;PBXO	19.1881	636.708	0	5.32178	546.79	0.000445	CTAACCCT	1
chr14	355861	355869	chr14_355861_355869_+	2. OR;PBXO	+	2. OR;PBXO	61.0529	636.348	1410.02	7.81916	367.044	0.000486	GTTAACCG	1
chr7	106868	106876	chr7_106868_106876_+	2. OR;PBXO	+	2. OR;PBXO	55.8198	631.312	348.795	1.96222	465.224	7.13e-05	ATTACCCT	0
chr15	792359	792367	chr15_792359_792367_+	2. OR;PBXO	+	2. OR;PBXO	26.1655	625.916	0	30.9496	344.387	0.000294	ACTACCCG	1
chr10	241706	241714	chr10_241706_241714_-	2. OR;PBXO	-	2. OR;PBXO	78.4966	621.959	586.947	32.9713	1670.58	8.6e-05	CTTACCCT	0
chr10	241712	241720	chr10_241712_241720_-	2. OR;PBXO	-	2. OR;PBXO	75.0079	621.599	586.947	32.9713	1676.62	4.14e-05	GTTACCCT	0
chr15	726910	726918	chr15_726910_726918_-	2. OR;PBXO	-	2. OR;PBXO	36.6318	619.441	1194.13	1.99195	350.429	0.000159	ATAACCCG	1
chr4	1042314	1042322	chr4_1042314_1042322_+	2. OR;PBXO	+	2. OR;PBXO	38.3761	618.721	28.3354	6.09478	327.772	0.000312	ATAACCCT	1
chr14	237916	237924	chr14_237916_237924_-	2. OR;PBXO	-	2. OR;PBXO	55.8198	611.167	0	11.7139	421.421	0.000662	CTGACCCG	1
chr12	429260	429268	chr12_429260_429268_+	2. OR;PBXO	+	2. OR;PBXO	40.1205	610.808	112.667	6.27317	335.324	7.13e-05	ATTACCCT	0
chr11	647064	647072	chr11_647064_647072_+	2. OR;PBXO	+	2. OR;PBXO	17.4437	610.088	61.3933	2.11088	447.099	2.67e-05	ATTACCCG	0
chr11	390100	390108	chr11_390100_390108_+	2. OR;PBXO	+	2. OR;PBXO	45.3536	605.771	0	2.40818	268.863	8.6e-05	CTTACCCT	0
chr14	510371	510379	chr14_510371_510379_+	2. OR;PBXO	+	2. OR;PBXO	34.8874	602.534	200.372	27.7684	409.337	0.000173	GTTACCCA	1
chr1	124690	124698	chr1_124690_124698_+	2. OR;PBXO	+	2. OR;PBXO	36.6318	600.016	136.954	5.70828	362.512	0.000573	AATACCCG	1
chr13	170534	170542	chr13_170534_170542_-	2. OR;PBXO	-	2. OR;PBXO	88.9628	598.937	0	2.46764	324.751	0.000849	ATTGCCCT	1
chr7	352397	352405	chr7_352397_352405_+	2. OR;PBXO	+	2. OR;PBXO	13.955	594.98	0	4.78663	383.659	8.6e-05	CTTACCCT	0
chr12	389169	389177	chr12_389169_389177_+	2. OR;PBXO	+	2. OR;PBXO	40.1205	584.908	0	2.08114	299.073	0.000405	GTTGCCCG	1
chr8	201275	201283	chr8_201275_201283_-	2. OR;PBXO	-	2. OR;PBXO	45.3536	584.548	0	2.82441	465.224	0.000132	GTTACCCC	1
chr13	835232	835240	chr13_835232_835240_+	2. OR;PBXO	+	2. OR;PBXO	19.1881	584.188	0	49.0556	388.19	0.000108	GTAACCCG	1
chr15	220269	220277	chr15_220269_220277_-	2. OR;PBXO	-	2. OR;PBXO	101.173	582.03	1291.96	5.41098	463.714	0.000445	CTAACCCT	1
chr12	37374	37382	chr12_37374_37382_-	2. OR;PBXO	-	2. OR;PBXO	54.0755	580.951	0	4.0731	425.952	0.000173	GTTACCCA	1
chr15	222833	222841	chr15_222833_222841_+	2. OR;PBXO	+	2. OR;PBXO	36.6318	578.792	356.216	6.3029	386.68	0.000198	GTAACCCT	1
chr14	653831	653839	chr14_653831_653839_-	2. OR;PBXO	-	2. OR;PBXO	45.3536	576.994	997.81	2.20007	427.463	0.000173	GTTACCCA	1
chr14	653834	653842	chr14_653834_653842_+	2. OR;PBXO	+	2. OR;PBXO	43.6092	576.274	997.81	2.20007	427.463	0.000198	GTAACCCT	1
chr12	78235	78243	chr12_78235_78243_-	2. OR;PBXO	-	2. OR;PBXO	55.8198	575.555	0	1.8433	373.086	0.000213	TTTACCCG	1
chr7	409310	409318	chr7_409310_409318_-	2. OR;PBXO	-	2. OR;PBXO	59.3086	573.396	1550.35	3.47849	259.801	0.000159	ATAACCCG	1
chr16	250230	250238	chr16_250230_250238_+	2. OR;PBXO	+	2. OR;PBXO	52.3311	572.317	0	3.12172	367.044	0.000783	GTAACCCA	2
chr4	79612	79620	chr4_79612_79620_+	2. OR;PBXO	+	2. OR;PBXO	57.5642	572.317	1354.03	2.70549	389.701	8.6e-05	CTTACCCT	0
chr16	273087	273095	chr16_273087_273095_+	2. OR;PBXO	+	2. OR;PBXO	26.1655	571.238	491.146	20.3952	380.638	0.000908	CTTAACCG	1
chr16	273105	273113	chr16_273105_273113_+	2. OR;PBXO	+	2. OR;PBXO	34.8874	571.238	491.146	20.3952	379.128	4.14e-05	GTTACCCT	0
chr8	236192	236200	chr8_236192_236200_+	2. OR;PBXO	+	2. OR;PBXO	24.4212	571.238	72.1877	1.8433	336.835	0.00051	AGTACCCG	1
chr7	718727	718735	chr7_718727_718735_+	2. OR;PBXO	+	2. OR;PBXO	94.1959	570.878	57.3454	97.7246	499.965	0.000405	GTTGCCCG	1
chr2	67213	67221	chr2_67213_67221_+	2. OR;PBXO	+	2. OR;PBXO	45.3536	569.08	404.791	5.41098	848.883	4.14e-05	GTTACCCT	0
chr16	502490	502498	chr16_502490_502498_-	2. OR;PBXO	-	2. OR;PBXO	6.97748	563.324	0	2.5271	404.806	0.000546	GTGACCCT	1
chr12	662028	662036	chr12_662028_662036_+	2. OR;PBXO	+	2. OR;PBXO	40.1205	559.727	159.892	1.78384	398.764	0.000132	GTTACCCC	1
chr10	224859	224867	chr10_224859_224867_+	2. OR;PBXO	+	2. OR;PBXO	34.8874	555.77	0	3.53795	421.421	0.000324	GCTACCCT	1
chr12	530369	530377	chr12_530369_530377_+	2. OR;PBXO	+	2. OR;PBXO	38.3761	555.77	0	1.75411	314.177	0.000405	GTTGCCCG	1
chr4	1496695	1496703	chr4_1496695_1496703_+	2. OR;PBXO	+	2. OR;PBXO	29.6543	554.331	0	16.6789	422.931	0.000364	GTGACCCG	1
chr4	1496692	1496700	chr4_1496692_1496700_-	2. OR;PBXO	-	2. OR;PBXO	31.3986	554.331	0	16.6789	418.4	0.000619	GTCACCCC	2
chr4	241269	241277	chr4_241269_241277_+	2. OR;PBXO	+	2. OR;PBXO	27.9099	553.252	0	26.0738	259.801	0.000876	ATCACCCC	2
chr4	241277	241285	chr4_241277_241285_+	2. OR;PBXO	+	2. OR;PBXO	29.6543	552.173	0	26.0738	255.269	0.000173	GTTACCCA	1
chr2	128200	128208	chr2_128200_128208_-	2. OR;PBXO	-	2. OR;PBXO	41.8649	546.058	393.997	2.17034	359.492	0.000546	GTGACCCT	1
chr15	286692	286700	chr15_286692_286700_+	2. OR;PBXO	+	2. OR;PBXO	59.3086	540.662	123.461	2.34872	708.41	7.13e-05	ATTACCCT	0
chr12	665179	665187	chr12_665179_665187_+	2. OR;PBXO	+	2. OR;PBXO	43.6092	539.583	2.69861	16.0545	428.973	0.000159	GTCACCCT	1
chr12	644576	644584	chr12_644576_644584_-	2. OR;PBXO	-	2. OR;PBXO	40.1205	535.985	456.739	2.31899	389.701	0.000173	GTTACCCA	1
chr14	275472	275480	chr14_275472_275480_-	2. OR;PBXO	-	2. OR;PBXO	47.098	529.87	0	1.93249	428.973	8.6e-05	CTTACCCT	0
chr15	170268	170276	chr15_170268_170276_+	2. OR;PBXO	+	2. OR;PBXO	40.1205	529.151	0	3.03253	474.287	4.14e-05	GTTACCCT	0
chr3	40909	40917	chr3_40909_40917_-	2. OR;PBXO	-	2. OR;PBXO	55.8198	529.151	0	2.28926	416.889	0.000457	GATACCCG	1
chr12	212955	212963	chr12_212955_212963_-	2. OR;PBXO	-	2. OR;PBXO	45.3536	525.194	0	2.25953	323.24	7.13e-05	ATTACCCT	0
chr16	826698	826706	chr16_826698_826706_-	2. OR;PBXO	-	2. OR;PBXO	33.143	524.474	0	5.67855	410.847	5.35e-05	CTTACCCG	0
chr4	1486392	1486400	chr4_1486392_1486400_-	2. OR;PBXO	-	2. OR;PBXO	29.6543	524.474	0	1.93249	258.29	0.000354	CTTACCCC	1
chr16	393892	393900	chr16_393892_393900_-	2. OR;PBXO	-	2. OR;PBXO	57.5642	522.676	0	15.2518	265.842	0.000249	CTAACCCG	1
chr16	51289	51297	chr16_51289_51297_+	2. OR;PBXO	+	2. OR;PBXO	61.0529	516.56	0	4.13256	350.429	0.00042	CTTACCCA	1
chr6	31323	31331	chr6_31323_31331_-	2. OR;PBXO	-	2. OR;PBXO	5.23311	514.762	0	3.47849	388.19	0.00012	ATCACCCG	1
chr15	837311	837319	chr15_837311_837319_-	2. OR;PBXO	-	2. OR;PBXO	43.6092	500.013	1233.94	6.18397	274.905	2.67e-05	ATTACCCG	0
chr16	544490	544498	chr16_544490_544498_-	2. OR;PBXO	-	2. OR;PBXO	43.6092	497.855	151.122	2.82441	279.437	9.59e-05	GTCACCCG	1
chr10	619058	619066	chr10_619058_619066_+	2. OR;PBXO	+	2. OR;PBXO	61.0529	495.697	582.224	4.87583	407.827	8.6e-05	CTTACCCT	0
chr4	931468	931476	chr4_931468_931476_+	2. OR;PBXO	+	2. OR;PBXO	40.1205	491.74	0	2.17034	315.688	0.000471	ACTACCCT	1
chr8	386410	386418	chr8_386410_386418_+	2. OR;PBXO	+	2. OR;PBXO	88.9628	491.02	0	4.01364	407.827	0.000249	CTAACCCG	1
chr4	665502	665510	chr4_665502_665510_-	2. OR;PBXO	-	2. OR;PBXO	26.1655	490.66	196.998	1.87303	232.612	0.000173	GTTACCCA	1
chr5	56241	56249	chr5_56241_56249_+	2. OR;PBXO	+	2. OR;PBXO	22.6768	487.063	0	5.35152	483.35	2.67e-05	ATTACCCG	0
chr4	1367593	1367601	chr4_1367593_1367601_-	2. OR;PBXO	-	2. OR;PBXO	76.7523	485.984	848.712	1.90276	345.897	0.000183	GCTACCCG	1
chr4	1367602	1367610	chr4_1367602_1367610_+	2. OR;PBXO	+	2. OR;PBXO	75.0079	484.905	848.712	1.90276	342.876	0.000756	ATGACCCT	1
chr14	337891	337899	chr14_337891_337899_-	2. OR;PBXO	-	2. OR;PBXO	33.143	483.466	912.129	2.25953	279.437	0.000619	GTCACCCC	2
chr9	231246	231254	chr9_231246_231254_-	2. OR;PBXO	-	2. OR;PBXO	47.098	480.229	403.442	22.298	462.203	0.000573	AATACCCG	1
chr14	560464	560472	chr14_560464_560472_+	2. OR;PBXO	+	2. OR;PBXO	62.7973	478.07	110.643	2.11088	365.533	0.000132	GTTACCCC	1
chr2	241546	241554	chr2_241546_241554_+	2. OR;PBXO	+	2. OR;PBXO	41.8649	475.192	0	11.9814	332.303	0.000237	ATTACCCC	1
chr12	66094	66102	chr12_66094_66102_+	2. OR;PBXO	+	2. OR;PBXO	68.0304	475.192	0	3.35956	457.672	0.000108	GTAACCCG	1
chr2	515946	515954	chr2_515946_515954_-	2. OR;PBXO	-	2. OR;PBXO	19.1881	473.754	0	1.81357	419.91	0.000108	GTAACCCG	1
chr9	44888	44896	chr9_44888_44896_-	2. OR;PBXO	-	2. OR;PBXO	40.1205	472.674	0	2.14061	359.492	8.6e-05	CTTACCCT	0
chr15	501838	501846	chr15_501838_501846_+	2. OR;PBXO	+	2. OR;PBXO	41.8649	470.516	0	3.44875	2149.4	0.000324	GCTACCCT	1
chr4	116051	116059	chr4_116051_116059_+	2. OR;PBXO	+	2. OR;PBXO	36.6318	469.437	514.084	12.7247	330.793	7.13e-05	ATTACCCT	0
chr16	608669	608677	chr16_608669_608677_+	2. OR;PBXO	+	2. OR;PBXO	61.0529	466.199	87.0301	1.99195	416.889	7.13e-05	ATTACCCT	0
chr8	173092	173100	chr8_173092_173100_-	2. OR;PBXO	-	2. OR;PBXO	29.6543	465.48	0	7.7597	386.68	0.000249	CTAACCCG	1
chr4	1200704	1200712	chr4_1200704_1200712_-	2. OR;PBXO	-	2. OR;PBXO	38.3761	463.322	593.693	1.78384	330.793	2.67e-05	ATTACCCG	0
chr15	458087	458095	chr15_458087_458095_+	2. OR;PBXO	+	2. OR;PBXO	38.3761	462.962	223.984	8.057	344.387	0.000386	GGTACCCG	1
chr13	630201	630209	chr13_630201_630209_+	2. OR;PBXO	+	2. OR;PBXO	52.3311	462.242	261.765	2.73522	330.793	0.000597	GTTGCCCT	1
chr13	315166	315174	chr13_315166_315174_-	2. OR;PBXO	-	2. OR;PBXO	45.3536	461.523	123.461	14.0031	354.96	0.000364	GTGACCCG	1
chr13	315169	315177	chr13_315169_315177_+	2. OR;PBXO	+	2. OR;PBXO	45.3536	461.163	123.461	14.0031	354.96	0.000686	GTCACCCA	2
chr13	255821	255829	chr13_255821_255829_-	2. OR;PBXO	-	2. OR;PBXO	45.3536	459.365	221.286	15.0734	380.638	0.000173	GTTACCCA	1
chr12	405052	405060	chr12_405052_405060_+	2. OR;PBXO	+	2. OR;PBXO	52.3311	452.53	448.643	2.64603	478.819	0.000386	GGTACCCG	1
chr8	553737	553745	chr8_553737_553745_-	2. OR;PBXO	-	2. OR;PBXO	57.5642	451.451	493.845	5.05421	483.35	0.000108	GTAACCCG	1
chr4	33369	33377	chr4_33369_33377_-	2. OR;PBXO	-	2. OR;PBXO	38.3761	450.012	0	2.05141	327.772	0.000724	CTTCCCCG	1
chr10	97652	97660	chr10_97652_97660_-	2. OR;PBXO	-	2. OR;PBXO	29.6543	447.494	47.9003	4.01364	450.12	0.000386	GGTACCCG	1
chr5	555	563	chr5_555_563_-	2. OR;PBXO	-	2. OR;PBXO	34.8874	443.177	24.9621	10.3165	0	0.000132	GTTACCCC	1
chr15	798185	798193	chr15_798185_798193_+	2. OR;PBXO	+	2. OR;PBXO	47.098	442.817	511.386	1.75411	303.604	0.000619	GTCACCCC	2
chr9	138300	138308	chr9_138300_138308_-	2. OR;PBXO	-	2. OR;PBXO	19.1881	441.019	0	2.20007	300.583	0.000686	GTCACCCA	2
chr5	371046	371054	chr5_371046_371054_-	2. OR;PBXO	-	2. OR;PBXO	38.3761	437.781	581.55	3.18118	296.052	0.000805	CATACCCG	1
chr11	550813	550821	chr11_550813_550821_-	2. OR;PBXO	-	2. OR;PBXO	59.3086	432.386	0	3.09199	445.588	0.000223	CTCACCCG	1
chr10	503653	503661	chr10_503653_503661_+	2. OR;PBXO	+	2. OR;PBXO	41.8649	432.026	0	4.54879	341.366	0.000756	ATGACCCT	1
chr15	273890	273898	chr15_273890_273898_-	2. OR;PBXO	-	2. OR;PBXO	71.5191	429.508	578.176	20.9304	410.847	7.13e-05	ATTACCCT	0
chr3	27460	27468	chr3_27460_27468_+	2. OR;PBXO	+	2. OR;PBXO	40.1205	426.63	388.599	3.21091	280.947	7.13e-05	ATTACCCT	0
chr14	654894	654902	chr14_654894_654902_-	2. OR;PBXO	-	2. OR;PBXO	55.8198	425.911	192.95	2.25953	486.371	0.000573	GGTACCCT	1
chr12	242485	242493	chr12_242485_242493_-	2. OR;PBXO	-	2. OR;PBXO	115.128	425.191	0	2.88387	270.374	8.6e-05	CTTACCCT	0
chr15	543358	543366	chr15_543358_543366_-	2. OR;PBXO	-	2. OR;PBXO	81.9854	423.393	0	2.49737	335.324	0.000213	TTTACCCG	1
chr2	457879	457887	chr2_457879_457887_-	2. OR;PBXO	-	2. OR;PBXO	47.098	420.155	105.92	2.11088	353.45	8.6e-05	CTTACCCT	0
chr7	884343	884351	chr7_884343_884351_+	2. OR;PBXO	+	2. OR;PBXO	108.151	419.076	891.889	60.8586	539.237	0.000108	GTAACCCG	1
chr4	803889	803897	chr4_803889_803897_+	2. OR;PBXO	+	2. OR;PBXO	24.4212	417.637	26.9861	2.11088	182.767	0.00042	CTTACCCA	1
chr7	165279	165287	chr7_165279_165287_+	2. OR;PBXO	+	2. OR;PBXO	26.1655	416.918	0	6.71912	324.751	0.000573	AATACCCG	1
chr7	885380	885388	chr7_885380_885388_-	2. OR;PBXO	-	2. OR;PBXO	41.8649	413.68	35.0819	1.90276	498.455	0.000132	GTTACCCC	1
chr11	110943	110951	chr11_110943_110951_+	2. OR;PBXO	+	2. OR;PBXO	45.3536	413.68	0	3.15145	412.358	8.6e-05	CTTACCCT	0
chr7	892210	892218	chr7_892210_892218_-	2. OR;PBXO	-	2. OR;PBXO	87.2185	412.601	0	1.96222	584.551	7.13e-05	ATTACCCT	0
chr15	307749	307757	chr15_307749_307757_+	2. OR;PBXO	+	2. OR;PBXO	106.407	411.522	0	7.28401	430.484	7.13e-05	ATTACCCT	0
chr4	589630	589638	chr4_589630_589638_-	2. OR;PBXO	-	2. OR;PBXO	29.6543	409.004	433.801	7.84889	250.738	0.000741	GTTAACCT	1
chr12	1012924	1012932	chr12_1012924_1012932_-	2. OR;PBXO	-	2. OR;PBXO	94.1959	407.565	78.9342	2.25953	261.311	4.14e-05	GTTACCCT	0
chr8	498953	498961	chr8_498953_498961_-	2. OR;PBXO	-	2. OR;PBXO	36.6318	402.169	116.715	12.9923	419.91	0.000159	ATAACCCG	1
chr7	982286	982294	chr7_982286_982294_+	2. OR;PBXO	+	2. OR;PBXO	26.1655	399.291	0	15.1032	283.968	5.35e-05	CTTACCCG	0
chr1	114702	114710	chr1_114702_114710_+	2. OR;PBXO	+	2. OR;PBXO	22.6768	398.572	0	13.4382	294.541	0.000132	GTTACCCC	1
chr7	777365	777373	chr7_777365_777373_+	2. OR;PBXO	+	2. OR;PBXO	33.143	398.212	0	1.93249	395.743	0.000294	ACTACCCG	1
chr13	425754	425762	chr13_425754_425762_+	2. OR;PBXO	+	2. OR;PBXO	59.3086	397.133	0	2.20007	362.512	0.000237	ATTACCCC	1
chr8	273462	273470	chr8_273462_273470_-	2. OR;PBXO	-	2. OR;PBXO	40.1205	395.334	0	8.71108	450.12	0.000405	GTTGCCCG	1
chr2	360704	360712	chr2_360704_360712_-	2. OR;PBXO	-	2. OR;PBXO	29.6543	394.615	147.749	3.47849	398.764	0.000573	GGTACCCT	1
chr2	809983	809991	chr2_809983_809991_-	2. OR;PBXO	-	2. OR;PBXO	27.9099	394.615	1117.22	2.14061	288.5	7.13e-05	ATTACCCT	0
chr2	783920	783928	chr2_783920_783928_-	2. OR;PBXO	-	2. OR;PBXO	47.098	393.176	0.674652	5.79747	361.002	0.000741	GTTAACCT	1
chr2	783923	783931	chr2_783923_783931_+	2. OR;PBXO	+	2. OR;PBXO	47.098	393.176	0.674652	5.79747	361.002	0.000864	TTAACCCG	2
chr4	22539	22547	chr4_22539_22547_-	2. OR;PBXO	-	2. OR;PBXO	29.6543	392.456	0	17.66	427.463	0.000573	AATACCCG	1
chr9	184589	184597	chr9_184589_184597_-	2. OR;PBXO	-	2. OR;PBXO	31.3986	391.377	0	3.62714	388.19	0.000198	GTAACCCT	1
chr6	226094	226102	chr6_226094_226102_-	2. OR;PBXO	-	2. OR;PBXO	73.2635	390.658	404.791	17.5411	506.007	0.000662	CTGACCCG	1
chr16	222998	223006	chr16_222998_223006_+	2. OR;PBXO	+	2. OR;PBXO	10.4662	388.859	0	8.83	315.688	0.000573	AATACCCG	1
chr15	3998	4006	chr15_3998_4006_+	2. OR;PBXO	+	2. OR;PBXO	24.4212	387.42	1150.28	4.25148	386.68	0.000324	GCTACCCT	1
chr4	714146	714154	chr4_714146_714154_+	2. OR;PBXO	+	2. OR;PBXO	47.098	386.701	0	3.59741	398.764	0.000405	GTTCCCCG	1
chr4	763753	763761	chr4_763753_763761_+	2. OR;PBXO	+	2. OR;PBXO	47.098	385.622	1.3493	11.8031	357.981	0.000534	ATTGCCCG	1
chr4	1036307	1036315	chr4_1036307_1036315_+	2. OR;PBXO	+	2. OR;PBXO	33.143	385.622	0	1.96222	302.094	0.000132	GTTACCCC	1
chr13	390754	390762	chr13_390754_390762_-	2. OR;PBXO	-	2. OR;PBXO	90.7072	384.902	0	2.73522	318.709	0.000486	GTTAACCG	1
chr13	390756	390764	chr13_390756_390764_+	2. OR;PBXO	+	2. OR;PBXO	95.9403	384.183	0	2.73522	318.709	0.000741	GTTAACCT	1
chr2	686721	686729	chr2_686721_686729_-	2. OR;PBXO	-	2. OR;PBXO	31.3986	384.183	779.897	45.4284	413.868	9.59e-05	GTCACCCG	1
chr14	685819	685827	chr14_685819_685827_-	2. OR;PBXO	-	2. OR;PBXO	27.9099	382.744	0	19.8006	416.889	0.00012	ATCACCCG	1
chr10	246373	246381	chr10_246373_246381_-	2. OR;PBXO	-	2. OR;PBXO	38.3761	382.744	0	4.19202	400.274	0.000324	GCTACCCT	1
chr5	328290	328298	chr5_328290_328298_-	2. OR;PBXO	-	2. OR;PBXO	29.6543	379.866	0	20.1276	499.965	0.000183	GCTACCCG	1
chr4	588715	588723	chr4_588715_588723_-	2. OR;PBXO	-	2. OR;PBXO	47.098	378.427	0	6.89751	297.562	0.000324	GCTACCCT	1
chr8	383285	383293	chr8_383285_383293_+	2. OR;PBXO	+	2. OR;PBXO	34.8874	378.427	0	2.6163	389.701	0.000405	GTTGCCCG	1
chr4	184781	184789	chr4_184781_184789_+	2. OR;PBXO	+	2. OR;PBXO	29.6543	374.47	1821.56	13.7058	404.806	0.000173	GTTACCCA	1
chr11	226867	226875	chr11_226867_226875_-	2. OR;PBXO	-	2. OR;PBXO	55.8198	369.434	741.442	3.62714	424.442	0.00051	AGTACCCG	1
chr8	65934	65942	chr8_65934_65942_+	2. OR;PBXO	+	2. OR;PBXO	38.3761	367.636	0	1.87303	268.863	0.000132	GTTACCCC	1
chr12	939761	939769	chr12_939761_939769_-	2. OR;PBXO	-	2. OR;PBXO	61.0529	364.398	0.674652	2.14061	368.554	8.6e-05	CTTACCCT	0
chr2	595118	595126	chr2_595118_595126_-	2. OR;PBXO	-	2. OR;PBXO	78.4966	363.679	284.028	9.69219	419.91	0.000805	CATACCCG	1
chr8	5777	5785	chr8_5777_5785_+	2. OR;PBXO	+	2. OR;PBXO	64.5417	362.959	0	3.18118	241.675	0.000282	ATTACCCA	1
chr5	546101	546109	chr5_546101_546109_+	2. OR;PBXO	+	2. OR;PBXO	95.9403	362.6	0	2.55684	453.141	0.000132	GTTACCCC	1
chr14	549350	549358	chr14_549350_549358_+	2. OR;PBXO	+	2. OR;PBXO	45.3536	362.6	0	12.0706	510.538	0.000457	GATACCCG	1
chr4	623139	623147	chr4_623139_623147_+	2. OR;PBXO	+	2. OR;PBXO	48.8423	360.801	529.601	5.9164	403.295	7.13e-05	ATTACCCT	0
chr6	22943	22951	chr6_22943_22951_-	2. OR;PBXO	-	2. OR;PBXO	13.955	353.966	0	2.46764	442.567	0.000354	CTTACCCC	1
chr10	701839	701847	chr10_701839_701847_-	2. OR;PBXO	-	2. OR;PBXO	76.7523	352.168	0.674652	1.8433	326.261	0.000445	CTAACCCT	1
chr13	52396	52404	chr13_52396_52404_-	2. OR;PBXO	-	2. OR;PBXO	45.3536	349.65	0	2.08114	466.735	0.000173	GTTACCCA	1
chr9	209249	209257	chr9_209249_209257_+	2. OR;PBXO	+	2. OR;PBXO	36.6318	347.132	0	2.28926	365.533	0.000237	ATTACCCC	1
chr10	195520	195528	chr10_195520_195528_+	2. OR;PBXO	+	2. OR;PBXO	45.3536	344.613	47.9003	1.81357	299.073	0.000173	GTTACCCA	1
chr5	85053	85061	chr5_85053_85061_+	2. OR;PBXO	+	2. OR;PBXO	27.9099	342.455	403.442	4.40014	518.091	0.000354	TTTACCCT	1
chr5	85069	85077	chr5_85069_85077_+	2. OR;PBXO	+	2. OR;PBXO	22.6768	341.736	0	4.40014	518.091	0.000324	GCTACCCT	1
chr15	574899	574907	chr15_574899_574907_-	2. OR;PBXO	-	2. OR;PBXO	118.617	341.376	906.057	49.7096	303.604	0.000213	TTTACCCG	1
chr4	1058408	1058416	chr4_1058408_1058416_+	2. OR;PBXO	+	2. OR;PBXO	59.3086	341.016	0	1.87303	341.366	0.000108	GTAACCCG	1
chr16	492317	492325	chr16_492317_492325_+	2. OR;PBXO	+	2. OR;PBXO	71.5191	338.858	365.661	4.96502	436.525	5.35e-05	CTTACCCG	0
chr5	133778	133786	chr5_133778_133786_+	2. OR;PBXO	+	2. OR;PBXO	45.3536	337.419	0	2.73522	385.17	0.00042	CTTACCCA	1
chr7	952399	952407	chr7_952399_952407_-	2. OR;PBXO	-	2. OR;PBXO	40.1205	334.541	0	2.9136	357.981	0.000237	ATTACCCC	1
chr16	381533	381541	chr16_381533_381541_+	2. OR;PBXO	+	2. OR;PBXO	19.1881	330.225	0	5.47044	362.512	0.00012	ATCACCCG	1
chr14	44375	44383	chr14_44375_44383_-	2. OR;PBXO	-	2. OR;PBXO	24.4212	328.786	14.8423	4.34067	527.154	0.000223	CTCACCCG	1
chr13	751431	751439	chr13_751431_751439_+	2. OR;PBXO	+	2. OR;PBXO	45.3536	323.75	0	7.07589	492.413	8.6e-05	CTTACCCT	0
chr10	551161	551169	chr10_551161_551169_-	2. OR;PBXO	-	2. OR;PBXO	61.0529	322.67	0	2.5271	573.978	8.6e-05	CTTACCCT	0
chr4	673663	673671	chr4_673663_673671_+	2. OR;PBXO	+	2. OR;PBXO	41.8649	317.634	0	4.0731	354.96	2.67e-05	ATTACCCG	0
chr14	365925	365933	chr14_365925_365933_+	2. OR;PBXO	+	2. OR;PBXO	13.955	316.195	0	34.8443	392.722	9.59e-05	GTCACCCG	1
chr13	800403	800411	chr13_800403_800411_+	2. OR;PBXO	+	2. OR;PBXO	36.6318	315.116	0	2.82441	317.198	0.00012	ATCACCCG	1
chr2	717271	717279	chr2_717271_717279_+	2. OR;PBXO	+	2. OR;PBXO	57.5642	314.757	0	2.05141	400.274	4.14e-05	GTTACCCT	0
chr5	249897	249905	chr5_249897_249905_-	2. OR;PBXO	-	2. OR;PBXO	22.6768	311.519	0	2.08114	312.667	0.000445	CTAACCCT	1
chr8	463654	463662	chr8_463654_463662_+	2. OR;PBXO	+	2. OR;PBXO	48.8423	310.44	0	2.08114	335.324	0.000471	ACTACCCT	1
chr14	560019	560027	chr14_560019_560027_+	2. OR;PBXO	+	2. OR;PBXO	40.1205	309.72	0	2.5271	424.442	0.000724	CTTGCCCG	1
chr15	960730	960738	chr15_960730_960738_+	2. OR;PBXO	+	2. OR;PBXO	52.3311	307.562	443.921	9.03811	324.751	2.67e-05	ATTACCCG	0
chr12	853763	853771	chr12_853763_853771_-	2. OR;PBXO	-	2. OR;PBXO	48.8423	305.404	833.869	1.78384	293.031	5.35e-05	CTTACCCG	0
chr16	876287	876295	chr16_876287_876295_+	2. OR;PBXO	+	2. OR;PBXO	45.3536	300.727	0.674652	2.5271	285.479	0.000893	AATACCCT	1
chr16	876311	876319	chr16_876311_876319_+	2. OR;PBXO	+	2. OR;PBXO	52.3311	300.727	0	2.5271	286.989	7.13e-05	ATTACCCT	0
chr4	1434469	1434477	chr4_1434469_1434477_-	2. OR;PBXO	-	2. OR;PBXO	10.4662	300.008	0	6.03532	302.094	0.000312	ATAACCCT	1
chr13	329043	329051	chr13_329043_329051_+	2. OR;PBXO	+	2. OR;PBXO	33.143	298.209	0	2.85414	367.044	5.35e-05	CTTACCCG	0
chr9	338158	338166	chr9_338158_338166_+	2. OR;PBXO	+	2. OR;PBXO	45.3536	296.051	0	5.02448	367.044	0.000573	AATACCCG	1
chr2	741187	741195	chr2_741187_741195_-	2. OR;PBXO	-	2. OR;PBXO	34.8874	296.051	0	7.13535	362.512	0.000573	AATACCCG	1
chr8	493769	493777	chr8_493769_493777_-	2. OR;PBXO	-	2. OR;PBXO	15.6993	293.173	0	2.28926	333.814	0.000498	ATGACCCG	1
chr7	271809	271817	chr7_271809_271817_+	2. OR;PBXO	+	2. OR;PBXO	104.662	292.094	576.827	3.32983	433.505	0.000364	GTGACCCG	1
chr13	575615	575623	chr13_575615_575623_+	2. OR;PBXO	+	2. OR;PBXO	57.5642	287.058	211.166	1.8433	336.835	0.000198	GTAACCCT	1
chr3	211753	211761	chr3_211753_211761_+	2. OR;PBXO	+	2. OR;PBXO	34.8874	287.058	387.925	6.2137	439.546	0.000573	AATACCCG	1
chr4	964957	964965	chr4_964957_964965_-	2. OR;PBXO	-	2. OR;PBXO	12.2106	285.979	0	6.86778	253.759	0.000534	ATTGCCCG	1
chr4	1417004	1417012	chr4_1417004_1417012_-	2. OR;PBXO	-	2. OR;PBXO	40.1205	285.619	1903.19	39.7499	489.392	0.000132	GTTACCCC	1
chr4	1417007	1417015	chr4_1417007_1417015_+	2. OR;PBXO	+	2. OR;PBXO	45.3536	282.741	1903.19	39.7499	492.413	0.000686	GTAACCCC	2
chr8	439185	439193	chr8_439185_439193_+	2. OR;PBXO	+	2. OR;PBXO	22.6768	279.504	0	6.45155	412.358	0.000213	TTTACCCG	1
chr6	160236	160244	chr6_160236_160244_-	2. OR;PBXO	-	2. OR;PBXO	55.8198	278.065	0	1.75411	376.107	0.000445	CTAACCCT	1
chr2	10686	10694	chr2_10686_10694_-	2. OR;PBXO	-	2. OR;PBXO	29.6543	275.187	373.757	8.65162	407.827	0.000173	GTTACCCA	1
chr7	484733	484741	chr7_484733_484741_+	2. OR;PBXO	+	2. OR;PBXO	52.3311	272.309	0	1.93249	306.625	0.000534	ATTGCCCG	1
chr2	176674	176682	chr2_176674_176682_-	2. OR;PBXO	-	2. OR;PBXO	54.0755	270.511	1482.21	2.2298	397.253	0.000282	ATTACCCA	1
chr16	279467	279475	chr16_279467_279475_-	2. OR;PBXO	-	2. OR;PBXO	55.8198	270.511	1154.33	2.02168	365.533	9.59e-05	GTCACCCG	1
chr3	228610	228618	chr3_228610_228618_-	2. OR;PBXO	-	2. OR;PBXO	43.6092	268.712	900.66	2.28926	392.722	0.000805	CATACCCG	1
chr2	604265	604273	chr2_604265_604273_+	2. OR;PBXO	+	2. OR;PBXO	40.1205	265.115	0	2.31899	419.91	0.000405	GTTCCCCG	1
chr16	35108	35116	chr16_35108_35116_+	2. OR;PBXO	+	2. OR;PBXO	19.1881	264.036	0	4.0731	394.232	0.000213	TTTACCCG	1
chr1	129134	129142	chr1_129134_129142_-	2. OR;PBXO	-	2. OR;PBXO	17.4437	264.036	0	2.14061	419.91	0.00012	ATCACCCG	1
chr13	881996	882004	chr13_881996_882004_+	2. OR;PBXO	+	2. OR;PBXO	45.3536	263.676	1082.82	1.96222	483.35	0.000386	GGTACCCG	1
chr11	203592	203600	chr11_203592_203600_-	2. OR;PBXO	-	2. OR;PBXO	57.5642	262.957	0	2.28926	424.442	0.00051	AGTACCCG	1
chr14	542472	542480	chr14_542472_542480_-	2. OR;PBXO	-	2. OR;PBXO	88.9628	261.518	85.6807	2.55684	376.107	0.00012	ATCACCCG	1
chr4	455108	455116	chr4_455108_455116_-	2. OR;PBXO	-	2. OR;PBXO	29.6543	261.158	487.773	1.81357	264.332	0.000652	ATTAACCG	1
chr2	561078	561086	chr2_561078_561086_-	2. OR;PBXO	-	2. OR;PBXO	20.9324	260.798	0	13.795	277.926	0.000173	GTTACCCA	1
chr4	1296798	1296806	chr4_1296798_1296806_-	2. OR;PBXO	-	2. OR;PBXO	20.9324	257.921	78.2596	1.75411	315.688	0.000173	GTTACCCA	1
chr2	743650	743658	chr2_743650_743658_-	2. OR;PBXO	-	2. OR;PBXO	54.0755	257.561	15.517	2.2298	308.136	9.59e-05	GTCACCCG	1
chr2	419517	419525	chr2_419517_419525_+	2. OR;PBXO	+	2. OR;PBXO	47.098	257.201	287.402	2.08114	359.492	0.000354	CTTACCCC	1
chr7	495252	495260	chr7_495252_495260_+	2. OR;PBXO	+	2. OR;PBXO	48.8423	256.122	971.498	4.01364	335.324	0.000237	ATTACCCC	1
chr7	849962	849970	chr7_849962_849970_+	2. OR;PBXO	+	2. OR;PBXO	45.3536	256.122	0	2.08114	424.442	0.000282	ATTACCCA	1
chr11	105207	105215	chr11_105207_105215_+	2. OR;PBXO	+	2. OR;PBXO	66.286	255.043	0	2.31899	487.881	0.000198	GTAACCCT	1
chr4	545284	545292	chr4_545284_545292_+	2. OR;PBXO	+	2. OR;PBXO	48.8423	251.805	744.815	4.13256	397.253	2.67e-05	ATTACCCG	0
chr15	1001802	1001810	chr15_1001802_1001810_-	2. OR;PBXO	-	2. OR;PBXO	43.6092	251.446	0	2.17034	285.479	0.000132	GTTACCCC	1
chr12	727461	727469	chr12_727461_727469_+	2. OR;PBXO	+	2. OR;PBXO	20.9324	250.366	875.023	2.49737	203.913	0.000159	ATAACCCG	1
chr12	692750	692758	chr12_692750_692758_+	2. OR;PBXO	+	2. OR;PBXO	54.0755	248.927	1445.78	3.77579	264.332	2.67e-05	ATTACCCG	0
chr5	441003	441011	chr5_441003_441011_-	2. OR;PBXO	-	2. OR;PBXO	45.3536	248.927	701.638	7.72997	311.157	0.000354	TTTACCCT	1
chr4	512867	512875	chr4_512867_512875_-	2. OR;PBXO	-	2. OR;PBXO	45.3536	247.848	103.222	9.33542	234.123	2.67e-05	ATTACCCG	0
chr7	121829	121837	chr7_121829_121837_+	2. OR;PBXO	+	2. OR;PBXO	45.3536	245.69	0	2.97306	425.952	0.00042	CTTACCCA	1
chr7	793660	793668	chr7_793660_793668_+	2. OR;PBXO	+	2. OR;PBXO	27.9099	244.251	0	2.64603	421.421	0.000198	GTAACCCT	1
chr8	297772	297780	chr8_297772_297780_-	2. OR;PBXO	-	2. OR;PBXO	24.4212	243.532	424.356	3.50822	489.392	0.000282	ATTACCCA	1
chr4	1367578	1367586	chr4_1367578_1367586_+	2. OR;PBXO	+	2. OR;PBXO	81.9854	243.172	848.712	1.90276	347.408	0.000724	CTTCCCCG	1
chr8	36055	36063	chr8_36055_36063_-	2. OR;PBXO	-	2. OR;PBXO	92.4516	242.812	24.9621	2.43791	327.772	8.6e-05	CTTACCCT	0
chr7	986992	987000	chr7_986992_987000_+	2. OR;PBXO	+	2. OR;PBXO	36.6318	242.093	0	4.57852	370.065	0.000223	CTCACCCG	1
chr6	229299	229307	chr6_229299_229307_-	2. OR;PBXO	-	2. OR;PBXO	15.6993	240.654	0	32.7632	445.588	9.59e-05	GTCACCCG	1
chr4	1151461	1151469	chr4_1151461_1151469_+	2. OR;PBXO	+	2. OR;PBXO	50.5867	240.654	0	7.31374	329.282	7.13e-05	ATTACCCT	0
chr16	326427	326435	chr16_326427_326435_-	2. OR;PBXO	-	2. OR;PBXO	36.6318	239.934	1086.19	32.4064	422.931	0.000237	ATTACCCC	1
chr16	476477	476485	chr16_476477_476485_-	2. OR;PBXO	-	2. OR;PBXO	57.5642	239.215	680.049	2.94333	339.855	2.67e-05	ATTACCCG	0
chr16	476497	476505	chr16_476497_476505_+	2. OR;PBXO	+	2. OR;PBXO	57.5642	239.215	680.049	2.94333	348.918	0.000849	ATTGCCCT	1
chr13	162469	162477	chr13_162469_162477_+	2. OR;PBXO	+	2. OR;PBXO	101.173	237.776	1501.1	1.96222	445.588	7.13e-05	ATTACCCT	0
chr10	358339	358347	chr10_358339_358347_+	2. OR;PBXO	+	2. OR;PBXO	47.098	237.776	0	2.9136	397.253	8.6e-05	CTTACCCT	0
chr9	330613	330621	chr9_330613_330621_-	2. OR;PBXO	-	2. OR;PBXO	57.5642	235.618	703.662	2.14061	483.35	0.000324	GCTACCCT	1
chr15	292311	292319	chr15_292311_292319_-	2. OR;PBXO	-	2. OR;PBXO	20.9324	234.898	0	10.703	356.471	0.000445	CTAACCCT	1
chr4	441130	441138	chr4_441130_441138_-	2. OR;PBXO	-	2. OR;PBXO	59.3086	234.898	0	1.93249	2156.95	0.000312	ATAACCCT	1
chr4	1350089	1350097	chr4_1350089_1350097_+	2. OR;PBXO	+	2. OR;PBXO	15.6993	233.819	0	47.6582	333.814	0.000294	ACTACCCG	1
chr7	643884	643892	chr7_643884_643892_+	2. OR;PBXO	+	2. OR;PBXO	15.6993	231.301	0	3.59741	425.952	0.000619	GTCACCCC	2
chr4	941391	941399	chr4_941391_941399_-	2. OR;PBXO	-	2. OR;PBXO	66.286	229.143	0	2.08114	306.625	0.000805	CATACCCG	1
chr15	427006	427014	chr15_427006_427014_+	2. OR;PBXO	+	2. OR;PBXO	41.8649	228.064	0	2.05141	492.413	9.59e-05	GTCACCCG	1
chr7	689870	689878	chr7_689870_689878_+	2. OR;PBXO	+	2. OR;PBXO	81.9854	226.984	143.701	19.6222	380.638	0.000249	CTAACCCG	1
chr15	770046	770054	chr15_770046_770054_-	2. OR;PBXO	-	2. OR;PBXO	40.1205	226.984	841.291	4.7569	351.939	0.000198	GTAACCCT	1
chr15	722461	722469	chr15_722461_722469_+	2. OR;PBXO	+	2. OR;PBXO	31.3986	225.186	662.508	2.25953	217.507	7.13e-05	ATTACCCT	0
chr2	631118	631126	chr2_631118_631126_+	2. OR;PBXO	+	2. OR;PBXO	43.6092	224.107	0	2.11088	409.337	0.000282	ATTACCCA	1
chr2	561463	561471	chr2_561463_561471_-	2. OR;PBXO	-	2. OR;PBXO	19.1881	224.107	1018.72	3.50822	267.353	0.000573	AATACCCG	1
chr13	615065	615073	chr13_615065_615073_+	2. OR;PBXO	+	2. OR;PBXO	45.3536	218.711	0	3.03253	397.253	0.000173	GTTACCCA	1
chr4	1001381	1001389	chr4_1001381_1001389_+	2. OR;PBXO	+	2. OR;PBXO	40.1205	216.912	0	2.55684	320.219	7.13e-05	ATTACCCT	0
chr3	186149	186157	chr3_186149_186157_-	2. OR;PBXO	-	2. OR;PBXO	12.2106	215.833	0	2.28926	286.989	0.000573	AATACCCG	1
chr7	199135	199143	chr7_199135_199143_+	2. OR;PBXO	+	2. OR;PBXO	33.143	215.833	242.2	4.31094	335.324	0.000312	ATAACCCT	1
chr5	314053	314061	chr5_314053_314061_+	2. OR;PBXO	+	2. OR;PBXO	26.1655	215.833	0	2.5271	373.086	0.000445	CTAACCCT	1
chr4	394052	394060	chr4_394052_394060_+	2. OR;PBXO	+	2. OR;PBXO	116.873	215.473	352.168	116.812	388.19	0.000294	ACTACCCG	1
chr12	52936	52944	chr12_52936_52944_-	2. OR;PBXO	-	2. OR;PBXO	33.143	212.596	0	2.46764	336.835	0.000498	ATGACCCG	1
chr12	958269	958277	chr12_958269_958277_-	2. OR;PBXO	-	2. OR;PBXO	12.2106	212.596	1022.77	21.1385	465.224	0.000486	GTTAACCG	1
chr12	958271	958279	chr12_958271_958279_+	2. OR;PBXO	+	2. OR;PBXO	12.2106	212.236	1022.77	21.1385	463.714	0.000486	GTTAACCG	1
chr8	280586	280594	chr8_280586_280594_+	2. OR;PBXO	+	2. OR;PBXO	50.5867	211.516	898.636	6.18397	357.981	0.000471	ACTACCCT	1
chr16	306410	306418	chr16_306410_306418_-	2. OR;PBXO	-	2. OR;PBXO	61.0529	210.437	116.04	1.99195	318.709	0.000159	GTCACCCT	1
chr2	490532	490540	chr2_490532_490540_+	2. OR;PBXO	+	2. OR;PBXO	69.7748	210.437	518.132	4.42987	339.855	0.000947	ACCACCCG	2
chr10	70319	70327	chr10_70319_70327_-	2. OR;PBXO	-	2. OR;PBXO	68.0304	208.639	380.503	7.25428	519.601	9.59e-05	GTCACCCG	1
chr8	555047	555055	chr8_555047_555055_-	2. OR;PBXO	-	2. OR;PBXO	50.5867	206.84	296.172	5.58936	418.4	4.14e-05	GTTACCCT	0
chr13	339642	339650	chr13_339642_339650_+	2. OR;PBXO	+	2. OR;PBXO	47.098	203.603	0	1.99195	395.743	0.00042	CTTACCCA	1
chr5	204340	204348	chr5_204340_204348_-	2. OR;PBXO	-	2. OR;PBXO	50.5867	203.243	0	3.59741	478.819	0.000159	GTCACCCT	1
chr5	204348	204356	chr5_204348_204356_-	2. OR;PBXO	-	2. OR;PBXO	55.8198	202.883	0	3.59741	483.35	0.000969	ATTAACCT	1
chr1	20561	20569	chr1_20561_20569_+	2. OR;PBXO	+	2. OR;PBXO	24.4212	201.444	583.574	3.59741	314.177	7.13e-05	ATTACCCT	0
chr2	801139	801147	chr2_801139_801147_-	2. OR;PBXO	-	2. OR;PBXO	34.8874	199.646	0	4.28121	456.162	0.000198	GTAACCCT	1
chr4	808117	808125	chr4_808117_808125_-	2. OR;PBXO	-	2. OR;PBXO	17.4437	198.926	51.9482	2.88387	299.073	0.000573	AATACCCG	1
chr6	196647	196655	chr6_196647_196655_-	2. OR;PBXO	-	2. OR;PBXO	33.143	198.926	34.4072	2.40818	395.743	0.000213	TTTACCCG	1
chr2	462739	462747	chr2_462739_462747_+	2. OR;PBXO	+	2. OR;PBXO	38.3761	196.408	0	7.81916	351.939	0.000173	GTTACCCA	1
chr7	749940	749948	chr7_749940_749948_+	2. OR;PBXO	+	2. OR;PBXO	34.8874	196.048	0	3.53795	454.651	0.000498	ATGACCCG	1
chr13	433885	433893	chr13_433885_433893_-	2. OR;PBXO	-	2. OR;PBXO	19.1881	192.451	0	3.27037	339.855	7.13e-05	ATTACCCT	0
chr10	113463	113471	chr10_113463_113471_+	2. OR;PBXO	+	2. OR;PBXO	20.9324	189.933	95.8005	2.34872	350.429	8.6e-05	CTTACCCT	0
chr13	345773	345781	chr13_345773_345781_+	2. OR;PBXO	+	2. OR;PBXO	31.3986	189.573	53.9721	4.48933	403.295	2.67e-05	ATTACCCG	0
chr15	868188	868196	chr15_868188_868196_+	2. OR;PBXO	+	2. OR;PBXO	29.6543	188.854	0	26.6387	326.261	0.000264	ATCACCCT	1
chr12	931935	931943	chr12_931935_931943_+	2. OR;PBXO	+	2. OR;PBXO	26.1655	188.134	1.3493	2.08114	457.672	7.13e-05	ATTACCCT	0
chr15	648624	648632	chr15_648624_648632_-	2. OR;PBXO	-	2. OR;PBXO	59.3086	187.415	0	4.31094	382.149	0.000805	CATACCCG	1
chr2	594042	594050	chr2_594042_594050_-	2. OR;PBXO	-	2. OR;PBXO	41.8649	185.257	694.891	2.64603	487.881	0.000783	GTAACCCA	2
chr2	649563	649571	chr2_649563_649571_-	2. OR;PBXO	-	2. OR;PBXO	59.3086	178.782	549.841	2.17034	496.944	0.000405	GTTGCCCG	1
chr3	299811	299819	chr3_299811_299819_-	2. OR;PBXO	-	2. OR;PBXO	41.8649	178.422	3.37326	5.88667	433.505	0.000354	TTTACCCT	1
chr6	104449	104457	chr6_104449_104457_-	2. OR;PBXO	-	2. OR;PBXO	43.6092	178.422	0	2.64603	407.827	5.35e-05	CTTACCCG	0
chr5	406507	406515	chr5_406507_406515_+	2. OR;PBXO	+	2. OR;PBXO	47.098	176.264	0	2.14061	300.583	4.14e-05	GTTACCCT	0
chr8	410921	410929	chr8_410921_410929_+	2. OR;PBXO	+	2. OR;PBXO	38.3761	171.587	0	10.9706	364.023	0.000445	CTAACCCT	1
chr5	126451	126459	chr5_126451_126459_+	2. OR;PBXO	+	2. OR;PBXO	45.3536	165.832	136.28	32.9118	496.944	7.13e-05	ATTACCCT	0
chr4	1050988	1050996	chr4_1050988_1050996_+	2. OR;PBXO	+	2. OR;PBXO	48.8423	156.479	0	1.99195	300.583	0.000159	ATAACCCG	1
chr7	1000422	1000430	chr7_1000422_1000430_-	2. OR;PBXO	-	2. OR;PBXO	29.6543	154.321	933.718	5.79747	430.484	0.000159	ATAACCCG	1
chr7	585236	585244	chr7_585236_585244_-	2. OR;PBXO	-	2. OR;PBXO	52.3311	153.601	0	1.8433	401.785	0.000237	ATTACCCC	1
chr4	1434441	1434449	chr4_1434441_1434449_+	2. OR;PBXO	+	2. OR;PBXO	10.4662	150.364	143.026	6.03532	264.332	0.000312	ATAACCCT	1
chr12	1003181	1003189	chr12_1003181_1003189_-	2. OR;PBXO	-	2. OR;PBXO	55.8198	107.917	1.3493	1.96222	323.24	8.6e-05	CTTACCCT	0
chr11	48551	48559	chr11_48551_48559_-	2. OR;PBXO	-	2. OR;PBXO	34.8874	96.7652	0	1.8433	397.253	7.13e-05	ATTACCCT	0
chr4	1437638	1437646	chr4_1437638_1437646_+	2. OR;PBXO	+	2. OR;PBXO	34.8874	96.4054	53.9721	3.6866	311.157	0.000237	ATTACCCC	1
chr4	151122	151130	chr4_151122_151130_-	2. OR;PBXO	-	2. OR;PBXO	57.5642	76.9805	257.042	6.92724	421.421	0.000364	GTGACCCG	1
chr15	741346	741354	chr15_741346_741354_-	2. OR;PBXO	-	2. OR;PBXO	36.6318	69.0666	370.384	2.08114	353.45	0.000173	GTTACCCA	1
chr13	819979	819987	chr13_819979_819987_+	2. OR;PBXO	+	2. OR;PBXO	57.5642	66.9082	0	2.17034	371.575	0.000354	TTTACCCT	1
chr2	360534	360542	chr2_360534_360542_-	2. OR;PBXO	-	2. OR;PBXO	17.4437	64.0305	536.348	9.00838	309.646	0.000312	ATAACCCT	1
chr7	1051842	1051872	chr7_1051853_1051861_+	3. OR;XO	+	3. OR;XO	1210.59	184.897	968.125	76.1402	812.632	1.21e-05	GTTACCCG	0
chr12	232	262	chr12_243_251_+	3. OR;XO	+	3. OR;XO	1001.27	161.875	1437.01	109.825	0	5.35e-05	CTTACCCG	0
chr11	321841	321871	chr11_321852_321860_+	3. OR;XO	+	3. OR;XO	423.882	159.357	399.394	16.2924	483.35	8.6e-05	CTTACCCT	0
chr11	278061	278091	chr11_278072_278080_+	3. OR;XO	+	3. OR;XO	1071.04	158.278	3537.2	151.983	768.829	1.21e-05	GTTACCCG	0
chr10	658751	658781	chr10_658762_658770_+	3. OR;XO	+	3. OR;XO	109.895	153.241	15.517	22.2088	374.596	0.000213	TTTACCCG	1
chr4	478864	478894	chr4_478875_478883_+	3. OR;XO	+	3. OR;XO	554.709	129.14	0	81.9376	339.855	0.000213	TTTACCCG	1
chr15	255163	255193	chr15_255174_255182_-	3. OR;XO	-	3. OR;XO	134.316	123.385	1652.22	179.038	983.315	0.00042	CTTACCCA	1
chr11	20899	20929	chr11_20910_20918_+	3. OR;XO	+	3. OR;XO	1432.13	108.996	437.849	6.39209	1271.81	0.000498	ATGACCCG	1
chr14	114160	114190	chr14_114171_114179_+	3. OR;XO	+	3. OR;XO	137.805	102.521	0	2.5271	844.352	0.000213	TTTACCCG	1
chr15	683721	683751	chr15_683732_683740_+	3. OR;XO	+	3. OR;XO	1800.19	92.8082	3216.06	92.9677	1119.26	1.21e-05	GTTACCCG	0
chr4	592007	592037	chr4_592018_592026_+	3. OR;XO	+	3. OR;XO	198.858	70.5055	748.863	1.75411	601.167	0.000937	ATAACCCC	2
chr3	179266	179296	chr3_179277_179285_-	3. OR;XO	-	3. OR;XO	6056.45	70.5055	2354.53	360.395	4205.14	0.00012	ATCACCCG	1
chr16	433141	433171	chr16_433152_433160_-	3. OR;XO	-	3. OR;XO	108.151	58.6346	1181.31	3.80552	371.575	0.000173	GTTACCCA	1
chr13	632947	632977	chr13_632958_632966_+	3. OR;XO	+	3. OR;XO	190.136	56.836	564.009	5.58936	515.07	8.6e-05	CTTACCCT	0
chr13	832237	832267	chr13_832248_832256_+	3. OR;XO	+	3. OR;XO	233.746	56.836	0	1.75411	3446.89	0.000849	ATTGCCCT	1
chr8	402777	402807	chr8_402788_402796_-	3. OR;XO	-	3. OR;XO	343.641	47.1236	58.02	38.9471	383.659	8.6e-05	CTTACCCT	0
chr10	228616	228646	chr10_228627_228635_+	3. OR;XO	+	3. OR;XO	303.52	36.6916	523.53	91.1541	625.334	0.000364	GTGACCCG	1
chr7	249705	249735	chr7_249716_249724_-	3. OR;XO	-	3. OR;XO	129.083	35.2527	0	31.901	427.463	2.67e-05	ATTACCCG	0
chr16	67237	67267	chr16_67248_67256_-	3. OR;XO	-	3. OR;XO	348.874	34.1736	44.527	6.48128	519.601	0.000213	TTTACCCG	1
chr4	936014	936044	chr4_936025_936033_+	3. OR;XO	+	3. OR;XO	104.662	32.7347	589.645	65.1696	484.86	7.13e-05	ATTACCCT	0
chr2	398417	398447	chr2_398428_398436_-	3. OR;XO	-	3. OR;XO	163.971	28.418	0	69.1832	351.939	0.000937	ATCACCCA	2
chr8	194	224	chr8_205_213_+	3. OR;XO	+	3. OR;XO	1453.06	16.9069	1776.36	106.584	0	5.35e-05	CTTACCCG	0
chr12	348747	348777	chr12_348758_348766_+	3. OR;XO	+	3. OR;XO	153.505	12.2305	481.701	50.8097	359.492	0.000173	GTTACCCA	1
chr7	234	264	chr7_245_253_+	3. OR;XO	+	3. OR;XO	997.779	7.91388	1445.78	19.3249	0	7.13e-05	ATTACCCT	0
chr7	223	253	chr7_234_242_+	3. OR;XO	+	3. OR;XO	982.08	7.91388	2045.54	19.3249	0	7.13e-05	ATTACCCT	0
chr4	172329	172359	chr4_172340_172348_-	3. OR;XO	-	3. OR;XO	129.083	7.91388	6.07186	55.8044	377.617	0.000132	GTTACCCC	1
chr15	762456	762486	chr15_762467_762475_-	3. OR;XO	-	3. OR;XO	174.437	5.39583	3143.88	93.1461	424.442	0.000159	ATAACCCG	1
chr7	485316	485346	chr7_485327_485335_+	3. OR;XO	+	3. OR;XO	228.512	2.51805	118.739	19.652	274.905	0.000213	TTTACCCG	1
chr6	4434	4464	chr6_4445_4453_+	3. OR;XO	+	3. OR;XO	111.64	2.15833	790.692	35.2308	259.801	0.000237	ATTACCCC	1
chr4	351	381	chr4_362_370_+	3. OR;XO	+	3. OR;XO	2199.65	1.79861	1285.89	10.9706	0	7.13e-05	ATTACCCT	0
chr4	340	370	chr4_351_359_+	3. OR;XO	+	3. OR;XO	2107.2	1.43889	1311.52	10.9706	0	8.6e-05	CTTACCCT	0
chr4	557	587	chr4_568_576_+	3. OR;XO	+	3. OR;XO	593.086	1.43889	16.8663	16.1735	0	8.6e-05	CTTACCCT	0
chr13	210	240	chr13_221_229_+	3. OR;XO	+	3. OR;XO	186.648	1.43889	7.42117	108.309	0	5.35e-05	CTTACCCG	0
chr7	855020	855050	chr7_855031_855039_-	3. OR;XO	-	3. OR;XO	1285.6	0.359722	922.923	301.885	4019.36	1.21e-05	GTTACCCG	0
chr15	1084238	1084268	chr15_1084249_1084257_-	3. OR;XO	-	3. OR;XO	1037.9	0.359722	547.142	38.1147	244.696	4.14e-05	GTTACCCT	0
chr13	923964	923994	chr13_923975_923983_-	3. OR;XO	-	3. OR;XO	996.035	0.359722	1942.32	5.58936	1146.45	8.6e-05	CTTACCCT	0
chr16	6876	6906	chr16_6887_6895_+	3. OR;XO	+	3. OR;XO	683.793	0.359722	611.234	44.9825	187.298	4.14e-05	GTTACCCT	0
chr12	131545	131575	chr12_131556_131564_-	3. OR;XO	-	3. OR;XO	668.093	0.359722	1857.99	147.999	3791.28	0.000312	ATAACCCT	1
chr4	1229729	1229759	chr4_1229740_1229748_-	3. OR;XO	-	3. OR;XO	188.392	0.359722	51.2735	99.7463	312.667	0.000213	TTTACCCG	1
chr7	591678	591708	chr7_591689_591697_+	3. OR;XO	+	3. OR;XO	177.926	0.359722	93.7766	21.1088	832.268	0.00012	ATCACCCG	1
chr7	591667	591697	chr7_591678_591686_+	3. OR;XO	+	3. OR;XO	150.016	0.359722	93.7766	21.1088	842.842	0.000237	ATTACCCC	1
chr7	123467	123497	chr7_123478_123486_+	3. OR;XO	+	3. OR;XO	1107.67	0	3064.27	56.7855	1598.08	2.67e-05	ATTACCCG	0
chr7	609243	609273	chr7_609254_609262_-	3. OR;XO	-	3. OR;XO	685.537	0	446.619	69.7184	1740.06	2.67e-05	ATTACCCG	0
chr16	159684	159714	chr16_159695_159703_-	3. OR;XO	-	3. OR;XO	352.363	0	455.39	38.2039	350.429	0.000457	GATACCCG	1
chr4	539486	539516	chr4_539497_539505_-	3. OR;XO	-	3. OR;XO	272.122	0	0	2.37845	1021.08	0.000324	GCTACCCT	1
chr11	451312	451342	chr11_451323_451331_+	3. OR;XO	+	3. OR;XO	258.167	0	15.517	97.1003	824.716	0.000183	GCTACCCG	1
chr5	287372	287402	chr5_287383_287391_-	3. OR;XO	-	3. OR;XO	242.467	0	556.588	13.6464	702.368	0.000108	GTAACCCG	1
chr4	709386	709416	chr4_709397_709405_+	3. OR;XO	+	3. OR;XO	188.392	0	526.903	40.4039	312.667	4.14e-05	GTTACCCT	0
chr15	1028826	1028856	chr15_1028837_1028845_-	3. OR;XO	-	3. OR;XO	163.971	0	0	8.50296	499.965	5.35e-05	CTTACCCG	0
chr12	451658	451688	chr12_451669_451677_+	3. OR;XO	+	3. OR;XO	155.249	0	315.062	7723.04	36.2512	0.000213	TTTACCCG	1
chr15	554717	554747	chr15_554728_554736_+	3. OR;XO	+	3. OR;XO	153.505	0	12.8184	5.5299	1289.94	9.59e-05	GTCACCCG	1
chr16	160309	160339	chr16_160320_160328_+	3. OR;XO	+	3. OR;XO	111.64	0	0	2.73522	336.835	7.13e-05	ATTACCCT	0
chr4	1369181	1369211	chr4_1369192_1369200_+	3. OR;XO	+	3. OR;XO	95.9403	0	487.098	5.88667	371.575	0.000249	CTAACCCG	1
chr2	398408	398438	chr2_398419_398427_+	3. OR;XO	+	3. OR;XO	94.1959	0	0	69.1832	338.345	0.000213	TTTACCCG	1
chr11	518852	518860	chr11_518852_518860_+	4. OR	+	4. OR	57.5642	1424.86	198.348	5.44071	321.73	0.00117	GGCACCCG	2
chr16	789750	789758	chr16_789750_789758_+	4. OR	+	4. OR	54.0755	1106.14	1493.68	2.9136	332.303	0.00129	GACACCCG	2
chr15	109846	109854	chr15_109846_109854_-	4. OR	-	4. OR	50.5867	980.242	1400.58	2.08114	431.994	0.00117	GGCACCCG	2
chr8	267358	267366	chr8_267358_267366_+	4. OR	+	4. OR	55.8198	956.14	0	2.17034	1028.63	0.00164	GGTACCCA	2
chr2	315405	315413	chr2_315405_315413_+	4. OR	+	4. OR	26.1655	827	0	8.53269	777.891	0.00129	GGAACCCG	2
chr9	65008	65016	chr9_65008_65016_-	4. OR	-	4. OR	47.098	782.755	0	2.67576	501.476	0.00382	GTTATCCG	1
chr12	564121	564129	chr12_564121_564129_-	4. OR	-	4. OR	36.6318	742.825	0	2.02168	391.211	0.00101	ATAACCCA	2
chr11	308624	308632	chr11_308624_308632_+	4. OR	+	4. OR	40.1205	613.685	339.35	2.14061	596.635	0.00387	GTTACCTG	1
chr11	205072	205080	chr11_205072_205080_+	4. OR	+	4. OR	31.3986	594.26	284.028	3.47849	283.968	0.00382	GTTATCCG	1
chr4	410921	410929	chr4_410921_410929_+	4. OR	+	4. OR	12.2106	535.985	0	7.04616	407.827	0.00169	GCTGCCCG	2
chr5	60323	60331	chr5_60323_60331_+	4. OR	+	4. OR	68.0304	480.948	1.3493	2.6163	424.442	0.00118	TCTACCCG	2
chr16	931255	931263	chr16_931255_931263_-	4. OR	-	4. OR	31.3986	427.349	0	2.28926	504.497	0.0045	TAAACCCG	3
chr3	226163	226171	chr3_226163_226171_-	4. OR	-	4. OR	31.3986	350.009	0	2.14061	388.19	0.00139	GTCAACCG	2
chr5	84791	84799	chr5_84791_84799_-	4. OR	-	4. OR	34.8874	304.684	673.302	4.66771	580.02	0.0012	GTCGCCCG	2
chr12	875214	875222	chr12_875214_875222_-	4. OR	-	4. OR	33.143	302.886	0	3.15145	345.897	0.00129	GACACCCG	2
chr13	902258	902266	chr13_902258_902266_+	4. OR	+	4. OR	66.286	264.036	0	3.24064	413.868	0.00129	GGAACCCG	2
chr10	365608	365616	chr10_365608_365616_+	4. OR	+	4. OR	26.1655	257.201	655.761	64.6344	413.868	0.00104	ACAACCCG	2
chr15	679055	679063	chr15_679055_679063_+	4. OR	+	4. OR	45.3536	247.848	449.993	4.40014	264.332	0.00137	GAAACCCG	2
chr15	1066253	1066261	chr15_1066253_1066261_-	4. OR	-	4. OR	50.5867	247.489	0	2.2298	657.054	0.00523	GTTACCTT	1
chr14	604908	604916	chr14_604908_604916_+	4. OR	+	4. OR	52.3311	247.489	0	2.55684	1237.07	0.00129	GGAACCCG	2
chr2	629921	629929	chr2_629921_629929_-	4. OR	-	4. OR	50.5867	245.33	918.201	2.73522	359.492	0.00382	GTTATCCG	1
chr7	879523	879531	chr7_879523_879531_+	4. OR	+	4. OR	19.1881	241.733	0	3.27037	312.667	0.00118	TCTACCCG	2
chr4	817741	817749	chr4_817741_817749_-	4. OR	-	4. OR	31.3986	237.057	50.5989	2.20007	314.177	0.0026	GTGCCCCG	2
chr8	207355	207363	chr8_207355_207363_+	4. OR	+	4. OR	19.1881	220.869	0	4.63798	383.659	0.00124	CTAACCCC	2
chr4	485523	485531	chr4_485523_485531_+	4. OR	+	4. OR	45.3536	198.926	0	1.75411	466.735	0.00161	GTCGCCCT	2
chr13	492131	492139	chr13_492131_492139_-	4. OR	-	4. OR	10.4662	180.94	51.9482	10.5841	238.654	8.6e-05	CTTACCCT	0
chr11	628357	628365	chr11_628357_628365_+	4. OR	+	4. OR	31.3986	180.94	124.136	1.75411	419.91	0.000282	ATTACCCA	1
chr4	1144816	1144824	chr4_1144816_1144824_-	4. OR	-	4. OR	62.7973	179.501	0	1.75411	348.918	0.000282	ATTACCCA	1
chr12	285972	285980	chr12_285972_285980_+	4. OR	+	4. OR	22.6768	179.141	0	1.90276	365.533	0.000132	GTTACCCC	1
chr2	5608	5616	chr2_5608_5616_+	4. OR	+	4. OR	52.3311	177.703	1335.81	35.3497	120.837	0.00432	TTACCCCG	3
chr9	186026	186034	chr9_186026_186034_-	4. OR	-	4. OR	33.143	176.983	83.6568	2.43791	515.07	0.000805	CATACCCG	1
chr13	560008	560016	chr13_560008_560016_-	4. OR	-	4. OR	12.2106	174.105	0	2.37845	329.282	0.000864	TTAACCCG	2
chr16	292557	292565	chr16_292557_292565_+	4. OR	+	4. OR	116.873	168.71	0.674652	87.7351	361.002	0.000213	TTTACCCG	1
chr14	465149	465157	chr14_465149_465157_-	4. OR	-	4. OR	38.3761	168.35	1.3493	3.24064	394.232	4.14e-05	GTTACCCT	0
chr4	465815	465823	chr4_465815_465823_+	4. OR	+	4. OR	50.5867	163.673	530.951	2.05141	382.149	0.000704	CGTACCCG	1
chr7	420769	420777	chr7_420769_420777_+	4. OR	+	4. OR	36.6318	163.314	82.3075	2.73522	474.287	0.000213	TTTACCCG	1
chr10	718026	718034	chr10_718026_718034_+	4. OR	+	4. OR	50.5867	160.436	0	4.04337	407.827	5.35e-05	CTTACCCG	0
chr10	209757	209765	chr10_209757_209765_-	4. OR	-	4. OR	69.7748	157.198	0	2.9136	400.274	0.00134	CCAACCCG	2
chr5	517660	517668	chr5_517660_517668_+	4. OR	+	4. OR	24.4212	156.119	0	7.84889	389.701	0.000864	TTAACCCG	2
chr13	773973	773981	chr13_773973_773981_+	4. OR	+	4. OR	26.1655	155.76	482.376	1.8433	258.29	0.000876	ATCACCCC	2
chr7	807941	807949	chr7_807941_807949_+	4. OR	+	4. OR	106.407	153.961	0	5.23259	297.562	0.000354	CTTACCCC	1
chr12	874112	874120	chr12_874112_874120_-	4. OR	-	4. OR	38.3761	152.522	0	1.96222	435.015	0.00229	AACACCCT	2
chr12	106659	106667	chr12_106659_106667_-	4. OR	-	4. OR	48.8423	149.285	565.358	2.28926	456.162	0.000405	GTTCCCCG	1
chr11	304214	304222	chr11_304214_304222_+	4. OR	+	4. OR	45.3536	148.565	0	6.57047	519.601	8.6e-05	CTTACCCT	0
chr2	782007	782015	chr2_782007_782015_-	4. OR	-	4. OR	40.1205	148.205	0	2.55684	444.078	0.000498	ATGACCCG	1
chr7	38893	38901	chr7_38893_38901_+	4. OR	+	4. OR	22.6768	147.126	0	4.25148	506.007	0.000213	TTTACCCG	1
chr16	864198	864206	chr16_864198_864206_-	4. OR	-	4. OR	19.1881	145.687	0	2.40818	361.002	0.00514	GTTATCCT	1
chr13	5298	5306	chr13_5298_5306_+	4. OR	+	4. OR	34.8874	144.968	902.684	26.7576	36.2512	7.13e-05	ATTACCCT	0
chr7	156403	156411	chr7_156403_156411_-	4. OR	-	4. OR	38.3761	142.09	402.092	4.04337	377.617	0.00382	GTTATCCG	1
chr13	432963	432971	chr13_432963_432971_-	4. OR	-	4. OR	26.1655	139.572	38.4551	1.87303	296.052	0.000354	TTTACCCT	1
chr7	299848	299856	chr7_299848_299856_-	4. OR	-	4. OR	20.9324	135.975	352.168	4.54879	270.374	0.000573	AATACCCG	1
chr16	118111	118119	chr16_118111_118119_+	4. OR	+	4. OR	12.2106	133.097	0	7.19482	320.219	0.000282	ATTACCCA	1
chr7	334753	334761	chr7_334753_334761_+	4. OR	+	4. OR	10.4662	132.018	0	25.9846	222.039	0.000704	GCCACCCG	2
chr7	837250	837258	chr7_837250_837258_+	4. OR	+	4. OR	33.143	131.658	601.115	2.5271	501.476	0.000108	GTAACCCG	1
chr2	300736	300744	chr2_300736_300744_-	4. OR	-	4. OR	24.4212	130.939	868.277	2.28926	158.599	8.6e-05	CTTACCCT	0
chr16	839631	839639	chr16_839631_839639_-	4. OR	-	4. OR	64.5417	129.86	884.468	2.94333	413.868	0.00174	TTGACCCG	2
chr4	1011501	1011509	chr4_1011501_1011509_-	4. OR	-	4. OR	13.955	128.78	0	1.87303	453.141	0.00352	GTTTCCCG	1
chr14	275857	275865	chr14_275857_275865_-	4. OR	-	4. OR	34.8874	126.262	0	9.66246	395.743	0.000108	GTAACCCG	1
chr4	778719	778727	chr4_778719_778727_-	4. OR	-	4. OR	88.9628	122.665	0	2.6163	386.68	0.000312	ATAACCCT	1
chr14	218968	218976	chr14_218968_218976_-	4. OR	-	4. OR	31.3986	117.989	0	2.17034	246.206	0.000132	GTTACCCC	1
chr14	594091	594099	chr14_594091_594099_-	4. OR	-	4. OR	78.4966	115.83	1816.84	2.94333	419.91	8.6e-05	CTTACCCT	0
chr4	117475	117483	chr4_117475_117483_-	4. OR	-	4. OR	38.3761	115.471	0	3.35956	270.374	0.000783	TTCACCCG	2
chr7	588801	588809	chr7_588801_588809_+	4. OR	+	4. OR	68.0304	111.514	1003.88	3.80552	450.12	7.13e-05	ATTACCCT	0
chr5	507471	507479	chr5_507471_507479_-	4. OR	-	4. OR	47.098	110.435	881.77	3.00279	468.245	5.35e-05	CTTACCCG	0
chr2	304836	304844	chr2_304836_304844_-	4. OR	-	4. OR	38.3761	102.161	638.22	3.50822	288.5	4.14e-05	GTTACCCT	0
chr7	999258	999266	chr7_999258_999266_+	4. OR	+	4. OR	6.97748	101.442	0	4.31094	557.363	0.000312	ATAACCCT	1
chr3	107933	107941	chr3_107933_107941_-	4. OR	-	4. OR	109.895	98.5638	0	8.59216	359.492	0.000223	CTCACCCG	1
chr4	546547	546555	chr4_546547_546555_-	4. OR	-	4. OR	29.6543	97.1249	20.2395	4.3704	412.358	0.00174	AAAACCCG	2
chr16	261043	261051	chr16_261043_261051_-	4. OR	-	4. OR	27.9099	95.686	0	4.28121	291.52	0.000376	CTCACCCT	1
chr10	381136	381144	chr10_381136_381144_+	4. OR	+	4. OR	29.6543	89.9304	0	5.9164	400.274	0.000783	TTCACCCG	2
chr4	748028	748036	chr4_748028_748036_-	4. OR	-	4. OR	71.5191	85.2541	0	1.93249	312.667	0.000159	GTCACCCT	1
chr15	434363	434371	chr15_434363_434371_+	4. OR	+	4. OR	47.098	84.1749	0.674652	1.87303	441.057	0.000573	GGTACCCT	1
chr16	920651	920659	chr16_920651_920659_+	4. OR	+	4. OR	27.9099	79.8582	188.228	1.93249	294.541	8.6e-05	CTTACCCT	0
chr7	994223	994231	chr7_994223_994231_-	4. OR	-	4. OR	20.9324	73.743	0	2.25953	540.748	0.00202	ATTGCCCC	2
chr14	239993	240001	chr14_239993_240001_-	4. OR	-	4. OR	43.6092	62.2319	0	4.19202	422.931	0.000445	CTAACCCT	1
chr13	317434	317442	chr13_317434_317442_+	4. OR	+	4. OR	52.3311	61.8721	55.3214	3.21091	496.944	0.00382	GTTATCCG	1
chr7	63097	63105	chr7_63097_63105_-	4. OR	-	4. OR	40.1205	59.3541	142.351	2.11088	277.926	0.000324	GCTACCCT	1
chr13	861090	861098	chr13_861090_861098_+	4. OR	+	4. OR	17.4437	58.9944	53.2975	1.78384	351.939	0.000486	GTTAACCG	1
chr7	322514	322522	chr7_322514_322522_-	4. OR	-	4. OR	66.286	56.836	0	2.17034	321.73	0.000132	GTTACCCC	1
chr4	1219243	1219251	chr4_1219243_1219251_-	4. OR	-	4. OR	34.8874	56.1166	1406.65	56.9044	404.806	0.000237	ATTACCCC	1
chr4	76977	76985	chr4_76977_76985_+	4. OR	+	4. OR	24.4212	55.7569	0	2.08114	277.926	0.000132	GTTACCCC	1
chr11	614841	614849	chr11_614841_614849_-	4. OR	-	4. OR	15.6993	54.6777	0	3.47849	357.981	0.000132	GTTACCCC	1
chr3	184911	184919	chr3_184911_184919_+	4. OR	+	4. OR	45.3536	54.318	0	3.00279	361.002	0.000173	GTTACCCA	1
chr8	70146	70154	chr8_70146_70154_+	4. OR	+	4. OR	19.1881	52.1597	0.674652	1.81357	388.19	0.00109	GCTACCCA	2
chr2	536320	536328	chr2_536320_536328_+	4. OR	+	4. OR	40.1205	50.0013	0	2.79468	373.086	0.000223	CTCACCCG	1
chr12	1065225	1065233	chr12_1065225_1065233_+	4. OR	+	4. OR	68.0304	48.9222	2.02395	2.28926	427.463	0.00483	AGTAACCT	2
chr2	595939	595947	chr2_595939_595947_-	4. OR	-	4. OR	52.3311	43.8861	58.02	7.61104	632.886	0.000183	GCTACCCG	1
chr15	692275	692283	chr15_692275_692283_-	4. OR	-	4. OR	26.1655	42.0874	0	7.61104	502.986	0.000364	GTGACCCG	1
chr10	706756	706764	chr10_706756_706764_+	4. OR	+	4. OR	57.5642	39.9291	410.188	2.97306	490.902	0.000405	GTTGCCCG	1
chr3	132279	132287	chr3_132279_132287_+	4. OR	+	4. OR	45.3536	38.1305	1476.14	4.19202	509.028	7.13e-05	ATTACCCT	0
chr7	648942	648950	chr7_648942_648950_-	4. OR	-	4. OR	115.128	35.9722	0	1.90276	302.094	4.14e-05	GTTACCCT	0
chr4	950426	950434	chr4_950426_950434_+	4. OR	+	4. OR	6.97748	32.0152	0	5.73801	338.345	0.000573	GGTACCCT	1
chr15	259207	259215	chr15_259207_259215_+	4. OR	+	4. OR	33.143	31.2958	0	2.20007	362.512	0.00178	GTAGCCCT	2
chr4	775487	775495	chr4_775487_775495_+	4. OR	+	4. OR	47.098	30.5763	0	3.32983	424.442	2.67e-05	ATTACCCG	0
chr16	883416	883424	chr16_883416_883424_+	4. OR	+	4. OR	45.3536	29.4972	0	2.5271	329.282	0.000173	GTTACCCA	1
chr4	1525696	1525704	chr4_1525696_1525704_-	4. OR	-	4. OR	10.4662	29.1375	331.254	37.5498	34.7408	0.00432	TTACCCCG	3
chr8	480868	480876	chr8_480868_480876_-	4. OR	-	4. OR	97.6847	28.7777	1361.45	169.346	427.463	0.000364	GTGACCCG	1
chr9	378356	378364	chr9_378356_378364_+	4. OR	+	4. OR	19.1881	28.418	0	19.3546	424.442	0.00012	ATCACCCG	1
chr15	99383	99391	chr15_99383_99391_-	4. OR	-	4. OR	48.8423	26.6194	166.639	2.05141	294.541	8.6e-05	CTTACCCT	0
chr4	1140671	1140679	chr4_1140671_1140679_-	4. OR	-	4. OR	48.8423	25.1805	1.3493	10.376	294.541	0.00012	ATCACCCG	1
chr16	651199	651207	chr16_651199_651207_+	4. OR	+	4. OR	48.8423	24.8208	0	2.94333	373.086	7.13e-05	ATTACCCT	0
chr7	364652	364660	chr7_364652_364660_-	4. OR	-	4. OR	69.7748	23.0222	228.707	2.08114	235.633	0.000173	GTTACCCA	1
chr2	335455	335463	chr2_335455_335463_-	4. OR	-	4. OR	38.3761	20.1444	226.683	2.02168	463.714	8.6e-05	CTTACCCT	0
chr4	221423	221431	chr4_221423_221431_-	4. OR	-	4. OR	85.4741	20.1444	0	1.75411	335.324	7.13e-05	ATTACCCT	0
chr9	245	253	chr9_245_253_+	4. OR	+	4. OR	76.7523	19.0653	10.7944	114.939	0	5.35e-05	CTTACCCG	0
chr2	427018	427026	chr2_427018_427026_-	4. OR	-	4. OR	71.5191	16.5472	0	6.9867	489.392	0.000223	CTCACCCG	1
chr4	999515	999523	chr4_999515_999523_+	4. OR	+	4. OR	47.098	16.5472	0	2.20007	330.793	0.000573	GGTACCCT	1
chr16	319029	319037	chr16_319029_319037_+	4. OR	+	4. OR	40.1205	14.3889	0	2.46764	231.102	0.000597	GTTCCCCT	1
chr12	1002498	1002506	chr12_1002498_1002506_-	4. OR	-	4. OR	85.4741	13.3097	0	2.49737	362.512	0.000741	GTTAACCT	1
chr8	557215	557223	chr8_557215_557223_-	4. OR	-	4. OR	29.6543	12.5903	26.3114	34.6659	49.8455	0.00432	TTACCCCG	3
chr7	756133	756141	chr7_756133_756141_-	4. OR	-	4. OR	62.7973	11.5111	0	2.17034	438.036	0.000183	GCTACCCG	1
chr14	331870	331878	chr14_331870_331878_-	4. OR	-	4. OR	88.9628	11.5111	532.3	2.11088	291.52	8.6e-05	CTTACCCT	0
chr4	1266383	1266391	chr4_1266383_1266391_+	4. OR	+	4. OR	61.0529	10.0722	1822.23	2.05141	302.094	0.000908	CTTAACCG	1
chr15	913488	913496	chr15_913488_913496_+	4. OR	+	4. OR	88.9628	9.35277	0	2.55684	303.604	5.35e-05	CTTACCCG	0
chr9	302934	302942	chr9_302934_302942_-	4. OR	-	4. OR	33.143	9.35277	0	3.35956	435.015	0.000947	ACCACCCG	2
chr12	1065377	1065385	chr12_1065377_1065385_-	4. OR	-	4. OR	95.9403	8.63332	244.224	31.5145	376.107	0.00432	TTACCCCG	3
chr16	105616	105624	chr16_105616_105624_-	4. OR	-	4. OR	68.0304	6.11527	1.3493	25.4197	418.4	0.000213	TTTACCCG	1
chr15	295319	295327	chr15_295319_295327_-	4. OR	-	4. OR	52.3311	6.11527	10.1198	2.05141	397.253	0.000457	GATACCCG	1
chr12	10957	10965	chr12_10957_10965_+	4. OR	+	4. OR	10.4662	5.75555	36.4312	27.4711	24.1675	7.13e-05	ATTACCCT	0
chr5	400882	400890	chr5_400882_400890_+	4. OR	+	4. OR	24.4212	5.39583	598.416	1.93249	357.981	0.000249	CTAACCCG	1
chr15	329232	329240	chr15_329232_329240_+	4. OR	+	4. OR	15.6993	4.67638	190.926	11.149	418.4	0.00382	GTTATCCG	1
chr7	229992	230000	chr7_229992_230000_-	4. OR	-	4. OR	26.1655	3.59722	0	4.10283	397.253	0.000312	ATAACCCT	1
chr10	426717	426725	chr10_426717_426725_-	4. OR	-	4. OR	59.3086	3.2375	60.044	2.73522	370.065	9.59e-05	GTCACCCG	1
chr10	633867	633875	chr10_633867_633875_-	4. OR	-	4. OR	61.0529	3.2375	965.426	2.34872	410.847	8.6e-05	CTTACCCT	0
chr10	228	236	chr10_228_236_+	4. OR	+	4. OR	64.5417	2.87777	2.02395	113.452	0	5.35e-05	CTTACCCG	0
chr12	459284	459292	chr12_459284_459292_+	4. OR	+	4. OR	286.077	2.87777	66.7905	3.12172	7.55234	0.00146	ATCGCCCG	2
chr6	4606	4614	chr6_4606_4614_-	4. OR	-	4. OR	85.4741	2.87777	5.39721	1.96222	196.361	0.00483	AGTAACCT	2
chr5	20152	20160	chr5_20152_20160_+	4. OR	+	4. OR	20.9324	2.15833	1032.89	2.76495	155.578	0.000354	CTTACCCC	1
chr12	458637	458645	chr12_458637_458645_-	4. OR	-	4. OR	1.74437	1.79861	0	7253.98	0	1.21e-05	GTTACCCG	0
chr14	424682	424690	chr14_424682_424690_-	4. OR	-	4. OR	26.1655	1.79861	1104.4	16.2924	338.345	0.000364	GTGACCCG	1
chr12	163304	163312	chr12_163304_163312_-	4. OR	-	4. OR	38.3761	1.79861	41.1537	4.28121	441.057	0.000376	CTCACCCT	1
chr14	604640	604648	chr14_604640_604648_+	4. OR	+	4. OR	43.6092	1.79861	846.688	2.97306	1173.63	8.6e-05	CTTACCCT	0
chr15	75597	75605	chr15_75597_75605_+	4. OR	+	4. OR	59.3086	1.79861	0	1.75411	427.463	0.000498	ATGACCCG	1
chr7	647006	647014	chr7_647006_647014_-	4. OR	-	4. OR	120.361	1.79861	0	9.00838	415.379	0.000213	TTTACCCG	1
chr2	571	579	chr2_571_579_-	4. OR	-	4. OR	10.4662	1.43889	0	5.76774	0	0.000132	GTTACCCC	1
chr12	833558	833566	chr12_833558_833566_+	4. OR	+	4. OR	41.8649	1.43889	267.837	3.74606	391.211	8.6e-05	CTTACCCT	0
chr5	241747	241755	chr5_241747_241755_-	4. OR	-	4. OR	48.8423	1.43889	0	3.62714	370.065	0.000354	TTTACCCT	1
chr16	104253	104261	chr16_104253_104261_-	4. OR	-	4. OR	54.0755	1.43889	0	2.28926	398.764	0.000783	GTAACCCA	2
chr14	356939	356947	chr14_356939_356947_+	4. OR	+	4. OR	43.6092	1.07917	75.561	3.41902	320.219	0.000573	AATACCCG	1
chr15	1084848	1084856	chr15_1084848_1084856_-	4. OR	-	4. OR	0	1.07917	0	34.5767	0	0.00432	TTACCCCG	3
chr5	570550	570558	chr5_570550_570558_-	4. OR	-	4. OR	83.7297	1.07917	601.789	34.2497	317.198	0.00432	TTACCCCG	3
chr9	73761	73769	chr9_73761_73769_-	4. OR	-	4. OR	29.6543	1.07917	0	10.0192	354.96	2.67e-05	ATTACCCG	0
chr12	489817	489825	chr12_489817_489825_+	4. OR	+	4. OR	382.017	1.07917	240.851	2.25953	1370	0.00218	AATACCCC	2
chr6	22142	22150	chr6_22142_22150_+	4. OR	+	4. OR	85.4741	1.07917	0	1.99195	356.471	0.000213	TTTACCCG	1
chr15	589403	589411	chr15_589403_589411_-	4. OR	-	4. OR	61.0529	0.719444	853.434	18.6411	338.345	2.67e-05	ATTACCCG	0
chr14	6379	6387	chr14_6379_6387_+	4. OR	+	4. OR	3.48874	0.359722	10.1198	33.7443	15.1047	0.00432	TTACCCCG	3
chr4	1224657	1224665	chr4_1224657_1224665_-	4. OR	-	4. OR	15.6993	0.359722	0	11.149	394.232	0.000183	GCTACCCG	1
chr14	216868	216876	chr14_216868_216876_-	4. OR	-	4. OR	69.7748	0.359722	279.306	8.29485	238.654	0.000198	GTAACCCT	1
chr12	878931	878939	chr12_878931_878939_+	4. OR	+	4. OR	64.5417	0.359722	0	3.92444	448.609	0.0021	CTACCCCG	2
chr11	184485	184493	chr11_184485_184493_-	4. OR	-	4. OR	41.8649	0.359722	0	3.47849	296.052	7.13e-05	ATTACCCT	0
chr15	1009376	1009384	chr15_1009376_1009384_+	4. OR	+	4. OR	36.6318	0.359722	0	2.85414	338.345	0.000213	TTTACCCG	1
chr2	116346	116354	chr2_116346_116354_+	4. OR	+	4. OR	50.5867	0.359722	0	2.70549	320.219	0.000354	TTTACCCT	1
chr2	341651	341659	chr2_341651_341659_-	4. OR	-	4. OR	41.8649	0.359722	0	2.70549	327.772	0.000704	GCCACCCG	2
chr15	433951	433959	chr15_433951_433959_+	4. OR	+	4. OR	52.3311	0.359722	24.9621	2.31899	347.408	5.35e-05	CTTACCCG	0
chr13	605877	605885	chr13_605877_605885_-	4. OR	-	4. OR	34.8874	0.359722	0	1.81357	288.5	0.000445	CTAACCCT	1
chr15	514116	514124	chr15_514116_514124_+	4. OR	+	4. OR	45.3536	0.359722	0.674652	1.81357	365.533	0.000498	ATGACCCG	1
chr12	467774	467782	chr12_467774_467782_-	4. OR	-	4. OR	3.48874	0	0	7237.57	0	1.21e-05	GTTACCCG	0
chr12	490163	490171	chr12_490163_490171_-	4. OR	-	4. OR	22.6768	0	2.02395	245.218	105.733	0.000354	TTTACCCT	1
chr12	464288	464296	chr12_464288_464296_-	4. OR	-	4. OR	0	0	0	173.776	0	0.00051	AGTACCCG	1
chr12	455151	455159	chr12_455151_455159_-	4. OR	-	4. OR	0	0	0	167.621	0	0.00051	AGTACCCG	1
chr14	131	139	chr14_131_139_+	4. OR	+	4. OR	0	0	0	109.379	0	5.35e-05	CTTACCCG	0
chr5	117041	117049	chr5_117041_117049_+	4. OR	+	4. OR	12.2106	0	0	82.2052	323.24	2.67e-05	ATTACCCG	0
chr16	40	48	chr16_40_48_+	4. OR	+	4. OR	0	0	0	50.8691	0	5.35e-05	CTTACCCG	0
chr10	6750	6758	chr10_6750_6758_+	4. OR	+	4. OR	0	0	0	48.1934	0	0.00432	TTACCCCG	3
[truncated: 3,403 more rows]
